# Supplementary material for: Achieving Long‐Wavelength Electroluminescence Using Two‐Coordinate Gold(I) Complexes: Overcoming the Energy Gap Law
Source: PubMed Central journal article supplement (PMC10767458; doi:10.1002/advs.202305745), 2023-11-12
Supplement: ADVS-11-2305745-s001.pdf [file ADVS-11-2305745-s001.pdf]

## Supporting Information

for *Adv. Sci.*, DOI 10.1002/adv.202305745

Achieving Long-Wavelength Electroluminescence Using Two-Coordinate Gold(I) Complexes:  
Overcoming the Energy Gap Law

*Sreenivas Avula, Byung Hak Jhun, Unhyeok Jo, Seunga Heo, Jun Yeob Lee\* and Youngmin You\**

Copyright WILEY-VCH Verlag GmbH & Co. KGaA, 69469 Weinheim, Germany, 2016.

## Supporting Information

### Achieving Long-Wavelength Electroluminescence Using Two-Coordinate Gold(I) Complexes: Overcoming the Energy Gap Law

Sreenivas Avula,<sup>1†</sup> Byung Hak Jhun,<sup>1†</sup> Unhyeok Jo,<sup>2</sup> Seunga Heo,<sup>3</sup> Jun Yeob Lee,<sup>2\*</sup> and Youngmin You<sup>1\*</sup>

<sup>1</sup> Department of Chemical and Biomolecular Engineering, Yonsei University, Seoul 03722, Republic of Korea.

<sup>2</sup> School of Chemical Engineering, Sungkyunkwan University, Suwon, Gyeonggi-do 16419, Republic of Korea.

<sup>3</sup> Division of Chemical Engineering and Materials Science, Ewha Womans University, Seoul 03760, Republic of Korea.

#### Experimental Details

**Materials.** Commercially available chemicals, including 2,3-dichloropyrazine, 2,6-diisopropyl aniline, tris(dibenzylideneacetone)dipalladium(0) (Pd<sub>2</sub>(dba)<sub>3</sub>), tricyclohexylphosphine (PCy<sub>3</sub>), trimethylsilyl chloride, sodium *tert*-butoxide (NaO<sup>t</sup>Bu), chloro(dimethylsulfido)gold(I), potassium bis(trimethylsilyl)amide (KHMDs), and triethylorthoformate were used as received, unless otherwise stated. Toluene and tetrahydrofuran (THF) were distilled over sodium prior to use. Au(I) complexes were prepared following the methods developed by Hame *et al.* after minor modifications.<sup>[1]</sup> The synthesis of [Au(<sup>Dipp</sup>PZI)(Cz)] was reported by Muniz *et al.*<sup>[2]</sup> All glassware, magnetic stir bars, syringes, and needles were dried in a convection oven at 120 °C. Reactions were monitored by using thin-layer chromatography (TLC). Commercial TLC plates (silica gel 254, Merck Co.) were developed, and the spots were visualized under UV irradiation at wavelengths of 254 or 365 nm. Column chromatography was performed on silica gel 60G (particle size 5–40 μm, Merck Co.). <sup>1</sup>H and <sup>13</sup>C{<sup>1</sup>H} NMR spectra were collected using Bruker, Avance III-300 and 500 NMR spectrometers. Chemical shifts were referenced to tetramethylsilane. High-resolution mass spectra were acquired using JEOL, JMS-700GC or Agilent, 6890 series instruments. Elemental analyses were performed using a Thermo Fisher Scientific, Flash 2000 instrument.

**Synthesis of N<sup>2</sup>,N<sup>3</sup>-bis(2,6-diisopropylphenyl)pyrazine-2,3-diamine.** 2,3-Dichloropyrazine (5.00 g, 33.6 mmol), 2,6-diisopropylaniline (17.9 g, 101 mmol), and NaO<sup>t</sup>Bu (9.70 g, 101 mmol) were added to an oven-dried 250 mL two-neck round-bottom flask equipped with a condenser and a magnetic stir bar. The mixtures were suspended in dry toluene (150 mL), and the mixture was purged with stream of an Ar gas for 15 min. After then, Pd<sub>2</sub>(dba)<sub>3</sub> (7.68 g, 8.39 mmol) and PCy<sub>3</sub> (3.76 g, 13.4 mmol) dissolved in 150 mL dry toluene were added to the reaction solution. The reaction mixture was allowed to be refluxed for 15 h under an Ar atmosphere. After cooling the reaction mixture, the solvent was evaporated under a reduced pressure. The crude product was diluted with CH<sub>2</sub>Cl<sub>2</sub>, and filtered through a celite pad to remove solid particles. The filtrate was poured onto water, and extracted with CH<sub>2</sub>Cl<sub>2</sub> (100

mL × twice). The combined organic layers were dried over anhydrous MgSO<sub>4</sub>, filtered, and concentrated. Finally, the product was purified by silica gel column chromatography using an eluent of EtOAc:*n*-hexane (3:17, v/v) to afford 5.80 g of red powders (40%). *R*<sub>f</sub> = 0.4 (EtOAc:*n*-hexane = 1:4, v/v). <sup>1</sup>H NMR (300 MHz, CD<sub>2</sub>Cl<sub>2</sub>) δ(ppm): 7.45 (s, 2H), 7.29–7.32 (m, 2H), 7.22–7.25 (m, 4H), 5.72 (s, 2H), 3.11 (m, 4H), 1.17 (d, *J* = 6.6 Hz, 24 H). <sup>13</sup>C{<sup>1</sup>H} NMR (126 MHz, CD<sub>2</sub>Cl<sub>2</sub>) δ(ppm): 146.8, 144.8, 134.7, 132.5, 128.0, 124.2, 29.2, 24.1, 23.9, 23.4. HR MS (FAB<sup>+</sup>, *m*-NBA): calcd for C<sub>28</sub>H<sub>39</sub>N<sub>4</sub> ([M+H]<sup>+</sup>), 431.3169; found, 431.3180.

**Synthesis of 1,3-bis(2,6-diisopropylphenyl)-1*H*-imidazo[4,5-*b*]pyrazine-3-ium chloride.**

*N*<sup>2</sup>,*N*<sup>3</sup>-Bis(2,6-diisopropylphenyl)pyrazine-2,3-diamine (1.000 g, 2.32 mmol) was dissolved in 250 mL of triethylorthoformate in an oven-dried 250 mL round-bottom flask equipped with a condenser and a magnetic stir bar. The reaction mixture was heated at 150 °C for 48 h. Fractional distillation apparatus was equipped to the reaction flask, and ca. 200 mL of a liquid containing ethanol formed during the condensation reaction was distilled off over the course of 4 h. After cooling the reaction solution to room temperature, 50 mL of fresh triethylorthoformate and trimethylsilyl chloride (2.52 g, 23.2 mmol) were added and the reaction mixture was stirred at 50 °C for additional 8 h. After the reaction mixtures cooled to room temperature, the solvent was removed under a reduced pressure, and the resultant solids were washed with diethyl ether to give 0.550 g of brown solids (50%). <sup>1</sup>H NMR (300 MHz, CD<sub>2</sub>Cl<sub>2</sub>) δ(ppm): 14.14 (s, 1H), 8.88 (s, 2H), 7.73 (t, *J* = 7.8 Hz, 2H), 7.49 (d, *J* = 7.8 Hz, 4H), 2.18–2.26 (m, 4H), 1.31 (d, *J* = 6.6 Hz, 12H), 1.14 (d, *J* = 6.6 Hz, 12H). <sup>13</sup>C{<sup>1</sup>H} NMR (126 MHz, CD<sub>2</sub>Cl<sub>2</sub>) δ(ppm): 163.5, 151.2, 151.0, 148.2, 147.0, 146.5, 146.2, 140.7, 138.2, 134.1, 133.1, 132.0, 130.4, 127.9, 126.8, 126.5, 125.4, 125.2, 124.9, 124.4, 124.2, 30.5, 30.4, 29.5, 28.9, 24.8, 24.2, 23.7. LR MS (FAB<sup>+</sup>, *m*-NBA): 441 ([M-Cl]<sup>+</sup>).

**Synthesis of [Au(<sup>Dipp</sup>PZI)(Cl)].** An oven-dried 50 mL Schlenk flask was charged with 1,3-bis(2,6-diisopropylphenyl)-1*H*-imidazo[4,5-*b*]pyrazine-3-ium chloride (0.500 g, 1.05 mmol) and freshly distilled THF. 1.0 M KHMDS (THF) (1.4 mL, 1.38 mmol) was dropwise added to the stirred reaction mixture, and the solution was stirred at room temperature for 1 h. Chloro(dimethylsulfido)gold(I) (0.412 g, 1.4 mmol) was added to the reaction flask. The reaction mixture was stirred at room temperature under an Ar atmosphere overnight. The reaction mixture was filtered through a layer of celite. The filtrate was collected and concentrated under a reduced pressure. Diethyl ether was poured onto the concentrated solution to afford precipitates. 0.250 g of brown solids were collected (35%). <sup>1</sup>H NMR (300 MHz, CD<sub>2</sub>Cl<sub>2</sub>) δ(ppm): 8.57 (s, 2H), 7.69 (t, *J* = 7.8 Hz, 2H), 7.46 (d, *J* = 7.8 Hz, 4H), 2.33 (m, 4H), 1.33 (d, *J* = 6.9 Hz, 12H), 1.10 (d, *J* = 6.9 Hz, 12H). <sup>13</sup>C{<sup>1</sup>H} NMR (126 MHz, CD<sub>2</sub>Cl<sub>2</sub>) δ(ppm): 188.2, 147.0, 146.9, 142.7, 142.3, 140.4, 132.3, 132.1, 130.6, 125.3, 30.0, 24.8, 24.6, 24.1. LR MS (FAB<sup>+</sup>, *m*-NBA): 637 ([M-Cl]<sup>+</sup>) and 439 ([M-(AuCl)]<sup>+</sup>).

**Synthesis of [Au(<sup>Dipp</sup>PZI)(ACD)].** To a flame-dried round-bottom flask, 9(10*H*)-acridone (0.072 g, 0.37 mmol) was added and dissolved in dry THF (10 mL). Na<sup>t</sup>BuO (0.046 g, 0.48 mmol) was added to the stirred solution, and stirred for 0.5 h under an Ar atmosphere. [Au(<sup>Dipp</sup>PZI)(Cl)] (0.250 g, 0.37 mmol) was subsequently added to the reaction mixture, which was stirred at room temperature for additional 12 h under dark. The reaction solution was diluted with 25 mL CH<sub>2</sub>Cl<sub>2</sub>, and filtered through celite. The filtrate was concentrated under a reduced pressure. The addition of 13 mL of CH<sub>2</sub>Cl<sub>2</sub>:diethyl ether (3:10, v/v) yielded yellow powders. Finally, purification by recrystallization in CH<sub>2</sub>Cl<sub>2</sub> and *n*-pentane afforded 0.220 g of single crystals (72%). <sup>1</sup>H NMR (300 MHz, CD<sub>2</sub>Cl<sub>2</sub>) δ(ppm): 8.65 (s, 2H), 8.27

(dd,  $J = 8.4$  and  $1.8$  Hz, 4 H), 7.86 (t,  $J = 7.8$  Hz, 2H), 7.58 (d,  $J = 7.8$  Hz, 4H), 7.12 (dt,  $J = 6.6$  and  $1.5$  Hz, 2H), 6.94–7.00 (m, 4H), 2.47 (m, 4H), 1.30 (d,  $J = 6.9$  Hz, 12H), 1.17 (d,  $J = 6.9$  Hz, 12H).  $^{13}\text{C}\{^1\text{H}\}$  NMR (126 MHz,  $\text{CD}_2\text{Cl}_2$ )  $\delta$  (ppm): 189.8, 177.8, 150.6, 147.6, 142.3, 140.7, 133.7, 132.2, 131.4, 131.0, 127.2, 126.7, 125.4, 125.3, 123.3, 122.7, 121.5, 119.7, 117.7, 30.2, 24.5, 24.4. HR MS (FAB<sup>+</sup>, *m*-NBA): calcd for  $\text{C}_{42}\text{H}_{45}\text{AuN}_5\text{O}$  ( $[\text{M}+\text{H}]^+$ ), 832.3284; found, 832.3282. Anal. Calcd for  $\text{C}_{42}\text{H}_{44}\text{AuN}_5\text{O}$ : C, 60.65; N, 8.42; H, 5.33. Found: C, 60.84; N, 8.30; H, 5.24%.

**Characterization of  $[\text{Au}(\text{DippPZI})(\text{Cz})]$ .**  $^1\text{H}$  NMR (300 MHz,  $\text{CD}_2\text{Cl}_2$ )  $\delta$  (ppm): 8.60 (s, 2H), 7.88–7.91 (m, 2 H), 7.81 (t,  $J = 7.8$  Hz, 2H), 7.57 (d,  $J = 7.8$  Hz, 4H), 7.02–7.08 (m, 2H), 6.89 (td,  $J = 7.8$  and  $0.9$  Hz, 2H), 6.63 (d,  $J = 8.1$  Hz, 2H), 2.50 (m, 4H), 1.35 (d,  $J = 6.9$  Hz, 12H), 1.16 (d,  $J = 6.9$  Hz, 12H).  $^{13}\text{C}\{^1\text{H}\}$  NMR (126 MHz,  $\text{CD}_2\text{Cl}_2$ )  $\delta$  (ppm): 192.2, 149.7, 147.5, 141.9, 140.9, 132.1, 131.1, 125.3, 124.2, 124.1, 119.7, 116.7, 113.9, 30.1, 24.6, 24.3. HR MS (FAB<sup>+</sup>, *m*-NBA): calcd for  $\text{C}_{41}\text{H}_{44}\text{AuN}_5$  ( $[\text{M}]^+$ ), 803.3262; found, 803.3262. Anal. Calcd for  $\text{C}_{41}\text{H}_{44}\text{AuN}_5$ : C, 61.27; N, 8.71; H, 5.52. Found: C, 61.51; N, 9.83; H, 5.54%.

**Synthesis of  $[\text{Au}(\text{DippPZI})(\text{DPA})]$ .**  $[\text{Au}(\text{DippPZI})(\text{DPA})]$  was prepared following the procedure used for the synthesis of  $[\text{Au}(\text{DippPZI})(\text{ACD})]$ , except employing diphenylamine (63 mg, 0.37 mmol) in place of 9(10*H*)-acridone. Purification by recrystallization with  $\text{CH}_2\text{Cl}_2$  and diethyl ether gave 0.215 g of red crystalline solids (72%).  $^1\text{H}$  NMR (300 MHz,  $\text{CD}_2\text{Cl}_2$ )  $\delta$  (ppm): 8.53 (s, 2H), 7.73 (t,  $J = 7.8$  Hz, 2H), 7.63 (d,  $J = 7.8$  Hz, 4H), 6.80 (m, 4H), 6.61 (t,  $J = 2.1$  and  $1.2$  Hz, 4H), 6.59 (m, 2H), 2.39 (m, 4H), 1.24 (d,  $J = 6.9$  Hz, 12H), 1.11 (d,  $J = 6.9$  Hz, 12H).  $^{13}\text{C}\{^1\text{H}\}$  NMR (126 MHz,  $\text{CD}_2\text{Cl}_2$ )  $\delta$  (ppm): 191.4, 154.4, 147.3, 141.5, 141.0, 131.8, 131.3, 128.7, 120.0, 118.1, 117.5, 30.3, 30.0, 24.3, 24.3, 24.1. HR MS (FAB<sup>+</sup>, *m*-NBA): calcd for  $\text{C}_{41}\text{H}_{46}\text{AuN}_5$  ( $[\text{M}]^+$ ), 805.3419; found, 805.3423. Anal. Calcd for  $\text{C}_{41}\text{H}_{46}\text{AuN}_5$ : C, 61.11; N, 8.69; H, 6.75. Found: C, 61.99; N, 8.33; H, 6.06%.

**Synthesis of  $[\text{Au}(\text{DippPZI})(\text{DPAC})]$ .**  $[\text{Au}(\text{DippPZI})(\text{DPAC})]$  was prepared following the procedure used for the synthesis of  $[\text{Au}(\text{DippPZI})(\text{ACD})]$ , except employing 9,9-diphenyl-9,10-dihydroacridine (0.123 g, 0.37 mmol) in place of 9(10*H*)-acridone. Purification by recrystallization with  $\text{CH}_2\text{Cl}_2$  and pentane gave 0.252 g of red crystalline solids (70%).  $^1\text{H}$  NMR (300 MHz,  $\text{CD}_2\text{Cl}_2$ )  $\delta$  (ppm): 8.54 (s, 2H), 7.74 (t,  $J = 7.8$  Hz, 2H), 7.48 (d,  $J = 7.8$  Hz, 4H), 7.06–7.12 (m, 6H), 6.85 (dt,  $J = 8.1$  and  $1.8$  Hz, 4H), 6.61 (td,  $J = 8.1$  and  $1.8$  Hz, 2H), 6.55 (dd,  $J = 8.1$  and  $1.8$  Hz, 2H), 6.46–6.50 (m, 4H), 2.41 (m, 4H), 1.21 (d,  $J = 6.9$  Hz, 12H), 1.11 (d,  $J = 6.9$  Hz, 12H).  $^{13}\text{C}\{^1\text{H}\}$  NMR (126 MHz,  $\text{CD}_2\text{Cl}_2$ )  $\delta$  (ppm): 192.0, 149.3, 148.6, 147.4, 141.6, 141.0, 131.8, 131.1, 130.8, 130.1, 129.4, 127.6, 126.3, 125.8, 125.2, 117.6, 117.3, 57.2, 30.2, 30.0, 24.4, 24.3, 24.1. HR MS (FAB<sup>+</sup>, *m*-NBA): calcd for  $\text{C}_{54}\text{H}_{54}\text{AuN}_5$  ( $[\text{M}]^+$ ), 969.4045; found, 969.4047. Anal. Calcd for  $\text{C}_{54}\text{H}_{54}\text{AuN}_5$ : C, 66.86; N, 7.22; H, 5.61. Found: C, 67.02; N, 7.62; H, 5.95%.

**Synthesis of  $[\text{Au}(\text{DippPZI})(\text{DMAC})]$ .**  $[\text{Au}(\text{DippPZI})(\text{DMAC})]$  was prepared following the procedure used for the synthesis of  $[\text{Au}(\text{DippPZI})(\text{ACD})]$ , except employing 9,9-dimethyl-9,10-dihydroacridine (0.077 g, 0.37 mmol) in place of 9(10*H*)-acridone. Purification by recrystallization with  $\text{CH}_2\text{Cl}_2$  and hexane gave 0.150 g of red crystalline solids (48%).  $^1\text{H}$  NMR (300 MHz,  $\text{CD}_2\text{Cl}_2$ )  $\delta$  (ppm): 8.57 (s, 2H), 7.76 (t,  $J = 7.8$  Hz, 2H), 7.51 (d,  $J = 7.8$  Hz, 4H), 7.08 (dd,  $J = 7.2$  and  $1.8$  Hz, 2H), 6.51–6.45 (m, 4H), 6.38 (dd,  $J = 7.8$  and  $1.8$  Hz, 2H), 2.47 (m, 4H), 1.37 (s, 6H), 1.32 (d,  $J = 6.9$  Hz, 12H), 1.14 (d,  $J = 6.9$  Hz, 12H).  $^{13}\text{C}\{^1\text{H}\}$  NMR (126 MHz,  $\text{CD}_2\text{Cl}_2$ )  $\delta$  (ppm): 192.3, 148.4, 147.4, 147.0, 142.3, 141.6, 141.1, 132.1,

132.0, 131.9, 131.2, 130.4, 125.9, 125.7, 125.4, 125.3, 125.2, 121.0, 117.5, 117.2, 32.7, 30.1, 30.0, 24.6, 24.4, 24.4, 24.1. LR MS (FAB<sup>+</sup>, *m*-NBA): 867 ([M+Na]<sup>+</sup>), 637 ([M-DMAC]<sup>+</sup>), and 439 ([M-(AuDMAC)]<sup>+</sup>). Anal.Calcd for C<sub>44</sub>H<sub>50</sub>AuN<sub>5</sub>: C, 62.48; N, 8.28; H, 5.96. Found: C, 62.56; N, 7.99; H, 5.81%.

**Synthesis of [Au(<sup>Dipp</sup>PZI)(PXZ)].** [Au(<sup>Dipp</sup>PZI)(PXZ)] was prepared following the procedure used for the synthesis of [Au(<sup>Dipp</sup>PZI)(ACD)], except employing 10*H*-phenoxazine (0.068 g, 0.37 mmol) in place of 9(10*H*)-acridone. Purification by repeated reprecipitation with CH<sub>2</sub>Cl<sub>2</sub> and hexane gave 0.164 g of blue powders (54%). <sup>1</sup>H NMR (300 MHz, CD<sub>2</sub>Cl<sub>2</sub>) δ (ppm): 8.57 (d, *J* = 9.9 Hz, 2H), 7.66–7.74 (m, 2 H), 7.44–7.50 (m, 4H), 6.57–6.62 (m, 2H), 6.04–6.18 (m, 4H), 5.62–5.77 (m, 2H), 2.33–2.47 (m, 4H), 1.30–1.35 (m, 12H), 1.11–1.15 (m, 12H); <sup>13</sup>C{<sup>1</sup>H} NMR (126 MHz, CD<sub>2</sub>Cl<sub>2</sub>) δ (ppm): 191.6, 191.1, 147.4, 147.2, 145.6, 144.5, 142.9, 142.3, 141.8, 141.6, 141.0, 140.4, 135.4, 132.1, 131.9, 131.8, 131.0, 130.6, 128.2, 125.3, 125.2, 124.7, 123.8, 123.1, 121.1, 118.8, 118.0, 116.7, 115.9, 115.7, 114.6, 114.4, 114.0, 30.1, 30.0, 24.6, 24.5, 24.4; LR MS (FAB<sup>+</sup>, *m*-NBA): 819 ([M+H]<sup>+</sup>), 637 ([M-PXZ]<sup>+</sup>), and 429 ([M-(AuPXZ)]<sup>+</sup>). Anal.Calcd for C<sub>41</sub>H<sub>44</sub>AuN<sub>5</sub>O: C, 60.07; N, 8.54; H, 5.41. Found: C, 60.58; N, 8.40; H, 5.40%.

**X-ray Crystallography.** Single crystals suitable for X-ray crystallographic analysis were grown by layering pentane or hexane on top of dichloromethane containing Au(I) complexes, or by diffusion of diethyl ether vapor at room temperature. A single crystal was picked up from the solution and mounted on a Bruker SMART CCD diffractometer equipped with a graphite-monochromated Mo *K*α ( $\lambda = 0.71073 \text{ \AA}$ ) radiation source under nitrogen cold stream at 223 K. The CCD data collected and integrated by using a Bruker-S SAINT software program. Semi-empirical absorption corrections based on equivalent reflections were applied by Bruker SADABS. Structures were solved and refined using SHELXL97.<sup>[3]</sup> Hydrogen atoms were placed on the geometrically ideal positions. All non-hydrogen atoms were refined anisotropic thermal parameters. Crystal data for [Au(<sup>Dipp</sup>PZI)(ACD)] (CCDC 2256305): C<sub>42</sub>H<sub>44</sub>AuN<sub>5</sub>O, monoclinic, *P*2<sub>1</sub>/*n*, *Z* = 4, *a* = 15.218(3), *b* = 14.128(3), *c* = 19.271(4) Å,  $\alpha = 90^\circ$ ,  $\beta = 111.515(6)^\circ$ ,  $\gamma = 90^\circ$ , *V* = 3854.5(15) Å<sup>3</sup>,  $\mu = 3.854 \text{ mm}^{-1}$ ,  $\rho_{\text{calcd}} = 1.433 \text{ Mg/m}^3$ , *R*<sub>1</sub> = 0.0225, *wR*<sub>2</sub> = 0.0500 for 9595 unique reflections and 450 variables. Crystal data for [Au(<sup>Dipp</sup>PZI)(Cz)] (CCDC 2256275): C<sub>41</sub>H<sub>44</sub>AuN<sub>5</sub>, triclinic, *P* $\bar{1}$ , *Z* = 8, *a* = 14.649(9), *b* = 17.043(10), *c* = 30.319(18) Å,  $\alpha = 89.146(19)^\circ$ ,  $\beta = 82.470(19)^\circ$ ,  $\gamma = 88.197(19)^\circ$ , *V* = 7500(8) Å<sup>3</sup>,  $\mu = 3.957 \text{ mm}^{-1}$ ,  $\rho_{\text{calcd}} = 1.424 \text{ Mg/m}^3$ , *R*<sub>1</sub> = 0.0459, *wR*<sub>2</sub> = 0.0696 for 36720 unique reflections and 1724 variables. Crystal data for [Au(<sup>Dipp</sup>PZI)(DPA)] (CCDC 2256306): C<sub>41</sub>H<sub>46</sub>AuN<sub>5</sub>, orthorhombic, *Pbca*, *Z* = 8, *a* = 19.901(17), *b* = 16.114(16), *c* = 24.04(3) Å,  $\alpha = 90^\circ$ ,  $\beta = 90^\circ$ ,  $\gamma = 90^\circ$ , *V* = 7709(13) Å<sup>3</sup>,  $\mu = 3.850 \text{ mm}^{-1}$ ,  $\rho_{\text{calcd}} = 1.389 \text{ Mg/m}^3$ , *R*<sub>1</sub> = 0.0554, *wR*<sub>2</sub> = 0.1202 for 9215 unique reflections and 432 variables. Crystal data for [Au(<sup>Dipp</sup>PZI)(DPAC)] (CCDC 2256307): C<sub>54</sub>H<sub>54</sub>AuN<sub>5</sub>, monoclinic, *P*2<sub>1</sub>/*c*, *Z* = 4, *a* = 14.645(3), *b* = 14.248(3), *c* = 21.785(5) Å,  $\alpha = 90^\circ$ ,  $\beta = 98.474(7)^\circ$ ,  $\gamma = 90^\circ$ , *V* = 4496.2(16) Å<sup>3</sup>,  $\mu = 3.314 \text{ mm}^{-1}$ ,  $\rho_{\text{calcd}} = 1.433 \text{ Mg/m}^3$ , *R*<sub>1</sub> = 0.0512, *wR*<sub>2</sub> = 0.0882 for 11156 unique reflections and 549 variables. Crystal data for [Au(<sup>Dipp</sup>PZI)(DMAC)] (CCDC 2256308): C<sub>44</sub>H<sub>50</sub>AuN<sub>5</sub>, orthorhombic, *P*2<sub>1</sub>2<sub>1</sub>2<sub>1</sub>, *Z* = 8, *a* = 16.035(9), *b* = 20.631(10), *c* = 23.907(11) Å,  $\alpha = 90^\circ$ ,  $\beta = 90^\circ$ ,  $\gamma = 90^\circ$ , *V* = 7909(7) Å<sup>3</sup>,  $\mu = 3.756 \text{ mm}^{-1}$ ,  $\rho_{\text{calcd}} = 1.421 \text{ Mg/m}^3$ , *R*<sub>1</sub> = 0.0449, *wR*<sub>2</sub> = 0.0752 for 20215 unique reflections and 920 variables.

**Steady-State UV–Vis Absorption Measurements.** UV–Vis absorption spectra were collected on a Shimadzu, UV-1650 PC spectrometer at 298 K. Sample solutions were prepared prior to measurements at a concentration of 10  $\mu\text{M}$  in toluene, unless otherwise stated. The solution was delivered into a quartz cell (Hellma, beam path length = 1.0 cm). Toluene containing 5 wt % of Zeonex and Au(I) complexes (5 wt % relative to Zeonex) were allowed to pass poly(tetrafluoroethylene) syringe filters (pore size = 0.45  $\mu\text{m}$ ), and spincoated onto 2 cm  $\times$  2 cm quartz plates using an EPLEX, SPIN-1200D spin coater.

**Steady-state Photoluminescence Measurements.** Photoluminescence spectra were collected on a PTI, Quanta Master 40 scanning spectrofluorimeter or a Varian, Cary Eclipse fluorescence spectrophotometer. The solutions and films used for the steady-state UV–Vis absorption studies were also used for the photoluminescence measurements. Solution samples were photoexcited at the following wavelengths: [Au(<sup>Dipp</sup>PZI)(ACD)], 462 nm; [Au(<sup>Dipp</sup>PZI)(Cz)], 475 nm; [Au(<sup>Dipp</sup>PZI)(DPA)], 549 nm; [Au(<sup>Dipp</sup>PZI)(DPAC)], 560 nm; [Au(<sup>Dipp</sup>PZI)(DMAC)], 590 nm; [Au(<sup>Dipp</sup>PZI)(PXZ)], 619 nm. Film samples were photoexcited at the following wavelengths: [Au(<sup>Dipp</sup>PZI)(ACD)], 472 nm; [Au(<sup>Dipp</sup>PZI)(Cz)], 473 nm; [Au(<sup>Dipp</sup>PZI)(DPA)], 575 nm; [Au(<sup>Dipp</sup>PZI)(DPAC)], 583 nm; [Au(<sup>Dipp</sup>PZI)(DMAC)], 596 nm; [Au(<sup>Dipp</sup>PZI)(PXZ)], 626 nm. The solutions were deaerated by bubbling Ar prior to the measurements. A quartz cell (Hellma, beam path length = 1.0 cm) was used for solution samples.

**Determination of Relative Photoluminescence Quantum Yields.** The photoluminescence quantum yield ( $\Phi$ ) was determined for 10  $\mu\text{M}$  sample solutions dissolved in Ar-saturated toluene. The  $\Phi$  was calculated using the equation  $\Phi = \Phi_{\text{ref}} \times (I/I_{\text{ref}}) \times (A_{\text{ref}}/A) \times (n/n_{\text{ref}})^2$ , where  $A$ ,  $I$ , and  $n$  are the absorbance at the excitation wavelength, the integrated photoluminescence intensity, and the refractive index of the solvent, respectively. 9,10-Diphenylanthracene ( $\Phi_{\text{ref}} = 1.00$ , toluene;  $\lambda_{\text{ex}} = 366$  nm) was used as the reference material.<sup>[4]</sup> Photoluminescence spectra were collected at 298 K in the emission range 350–850 nm and were integrated using the OriginLab, OriginPro 2018 software.

**Determination of Absolute Photoluminescence Quantum Yields.** The  $\Phi$  values of Zeonex films doped with 5 wt % samples (quartz substrates) were determined absolutely, using the methods embedded on a PTI, FelixGX software. The photon flux of an excitation beam ( $I_{\text{ex}}(0)$ ) was quantified in the absence of a sample. The sample was placed into an integrating sphere (PTI), and an excitation beam was focused at the center of the sample. The flux of the excitation photons ( $I_{\text{ex}}(s)$ ) was then quantitated. Finally, the photon flux of the photoluminescence emission from the sample ( $I_{\text{em}}$ ) was measured under the following conditions: integration time, 0.1 s; step size, 0.0625 nm; emission range, 410–900 nm. The ratio between the absorbed photon flux and the emission photon flux corresponded to  $\Phi$ :  $\Phi = I_{\text{em}}/(I_{\text{ex}}(0) - I_{\text{ex}}(s))$ . The measurement was repeated in triplicate for each fresh sample.

**Photoluminescence Lifetime Measurements.** Photoluminescence decay traces were collected by employing time-correlated single-photon-counting (TCSPC) technique using a PicoQuant, FluoTime 200 instrument through a motorized monochromator at the peak emission wavelength of each sample. A diode laser that produced 377 nm pulses (PicoQuant, LDH375) was driven by a PDL800-D driver (PicoQuant). The details about the measurement conditions are indicated in the caption of Figures S9 and S10. Temperature-dependent measurements were conducted in the range 79–315 K using an Oxford Instruments Omicron

Nanoscience, Optistat DN2 variable-temperature liquid N<sub>2</sub> cryostat equipped with a MercuryITC temperature controller. Fluorescence decay profiles were fitted to a triexponential decay model embedded on an OriginLab, OriginPro 2022b software.

**Determination of  $S_1$ – $T_1$  Energy Difference.** The energy difference between the  $S_1$  and the  $T_1$  states ( $\Delta E_{S_1-T_1}$ ) was determined based on the variable-temperature photoluminescence lifetime data, following eq S1 developed by Hofbeck *et al.*<sup>[5]</sup>

$$\tau(T) = \frac{3 + \exp\left(\frac{-\Delta E_{S_1-T_1}}{k_B T}\right)}{3k_r^{T_1} + k_r^{S_1} \exp\left(\frac{-\Delta E_{S_1-T_1}}{k_B T}\right)} \quad (\text{eq S1})$$

In eq S1,  $\tau(T)$  is the observed photoluminescence lifetime determined at temperature  $T$ ,  $k_B$  is the Boltzmann constant,  $T$  is the absolute temperature,  $k_r^{S_1}$  and  $k_r^{T_1}$  are the radiative decay rates of the  $S_1$  and  $T_1$  states, respectively.

**Determination of Rate Constants for ISC and rISC.** The photophysical processes involved in TADF of the Au(I) complexes were analyzed based on eqs S2–S5 developed by Ying *et al.*<sup>[6]</sup>

$$k_r^{S_1} = \Phi_{PF}k_{PF} + \Phi_{DF}k_{DF} \quad (\text{eq S2})$$

$$k_{nr}^{S_1} = \frac{1 - \Phi_{total}}{\Phi_{total}} k_r^{S_1} \quad (\text{eq S3})$$

$$k_{rISC} \approx \frac{(\Phi_{PF} + \Phi_{DF})k_{PF}k_{DF}}{\Phi_{PF}k_{PF} + \Phi_{DF}k_{DF}} = \frac{\Phi_{total}k_{PF}k_{DF}}{k_r^{S_1}} \quad (\text{eq S4})$$

$$k_{ISC} = \frac{\Phi_{PF}\Phi_{DF}k_{PF}k_{DF}(k_{PF} - k_{DF})^2}{(\Phi_{PF}k_{PF} + \Phi_{DF}k_{DF})^2 k_{rISC}} \approx \frac{\Phi_{PF}\Phi_{DF}(k_{PF} - k_{DF})^2}{k_r^{S_1}\Phi_{total}} \quad (\text{eq S5})$$

In these equations,  $k_{nr}^{S_1}$  is the nonradiative decay rate of the  $S_1$  state,  $k_{PF}$  is the rate for prompt fluorescence,  $k_{DF}$  is the rate for delayed fluorescence,  $k_{ISC}$  is the rate for intersystem crossing from the  $S_1$  state to the  $T_1$  state,  $k_{rISC}$  is the rate for reverse intersystem crossing,  $\Phi_{PF}$  is the quantum yield for prompt fluorescence,  $\Phi_{DF}$  is the quantum yield for delayed fluorescence, and  $\Phi_{total} = \Phi_{PF} + \Phi_{DF}$ .

**Electrochemical Characterization.** Cyclic and differential pulse voltammograms of the Ar-saturated anhydrous THF solutions (2.0 mL) containing 2.0 mM sample and 0.10 M tetrabutylammonium hexafluorophosphate were collected using a CH instruments, CHI630B instrument at 298 K. Standard three-electrode-assembly consisting of a platinum working electrode, a platinum counter electrode and an Ag/AgNO<sub>3</sub> pseudo reference electrode was used. The potentials were reported against saturated calomel electrode. The ferrocene/ferrocenium redox couple was employed as an external standard. Scan rates for cyclic and differential pulse voltammetries were 0.1 V s<sup>-1</sup> and 4 mV s<sup>-1</sup>, respectively.

**Quantum Chemical Calculations.** Quantum chemical calculations based on density functional theory (DFT) were performed using a Gaussian 09 program. Ground-state geometry optimization was performed using the B3LYP functional, the “double- $\xi$ ” quality LANL2DZ basis set for the Au atom, and the 6-311G(d) basis set for all other atoms (i.e., C, H, O, and N). A pseudo-potential (LANL2DZ) was used to replace the inner core electrons of the Au(I) atom, leaving the outer core and valence electrons. The S<sub>1</sub> and T<sub>1</sub> state geometries were optimized at the time-dependent (TD)-Coulomb-attenuated method (CAM)-B3LYP level of theory using basis sets identical to those used for the ground-state optimization. Single-point calculations were carried out for the optimized geometries using the TD-CAM-B3LYP functional with the same basis set used in geometry optimization. The conductor-like polarizable continuum model (CPCM) parameterized for THF was applied for TD-DFT calculations.

**Determination of Overlap between Hole and Electron Distribution.** The overlap between hole and electron distributions ( $S_i(r)$ ) was calculated using a Multiwfn software,<sup>[7]</sup> following the method developed by Liu *et al.*<sup>[8]</sup> Hole and electron distributions of the excited state were calculated based on the protocols reported by Li *et al.*<sup>[9]</sup> and Jin *et al.*<sup>[10]</sup> The hole and electron distributions for each fragment of the carbene ligand, Au(I), and the amido ligand were computed using the Multiwfn program. Each fragment is defined as a selection of constituent atoms excluding hydrogen.  $S_{i,\text{total}}(r)$  value was multiplied by the fragmental contribution to the entire structure to derive the  $S_i(r)$  value for each fragment. This calculation automatically yielded the Cartesian coordinates for centroids of hole and electron distributions. The distance between the centroid of hole and the N atom in the amido ligand ( $d_{h-N}$ ) was computed from their Cartesian coordinates.

**Thermal Analysis.** Thermogravimetric analysis (TGA) and differential scanning calorimetry (DSC) were simultaneously collected using a TA instruments, SDT Q600 in the range 30–500 °C under nitrogen atmosphere with heating rate of 10 °C min<sup>-1</sup>. Au(I) complexes were loaded on an alumina pan. The decomposition temperature and melting temperature of the Au(I) complexes were characterized by the temperature at their 5 % of weight loss point in TGA and that at the endothermic peak in DSC.

**Device Fabrication and Characterization.** Multilayer OLEDs were constructed with the following configuration: 50 nm of indium tin oxide (ITO)/60 nm of poly(3,4-ethylenedioxythiophene):polystyrenesulfonate (PEDOT:PSS)/20 nm of 4,4'-cyclohexylidenebis[*N,N*-bis(4-methylphenyl)aniline] (TAPC)/10 nm of 9,9-dimethyl-10-(9-phenyl-9H-carbazol-3-yl)-9,10-dihydroacridine (PCZAC)/emitting layer (25 nm)/5 nm of diphenyl-4-triphenylsilylphenyl-phosphineoxide (TSPO1)/40 nm of 2,2',2''-(1,3,5-benzinetriyl)-tris(1-phenyl-1H-benzimidazole) (TPBi)/LiF (1.5 nm)/Al (200 nm). The emitting layer involved a mixed host system of 2-phenyl-4,6-bis(12-phenylindolo[2,3-*a*]carbazole-11-yl)-1,3,5-triazine (PBICT) and 4-(3-(triphenylene-2-yl)phenyl)dibenzo[*b,d*]thiophene (DBTTP1) at a ratio of 70 and 30%, respectively. Au(I) complexes were co-evaporated with the hosts at doping concentrations of 1–10%. ITO served as the anode, PEDOT:PSS was a hole-injection layer, TAPC was a hole-transporting layer, PCZAC was an electron-blocking layer, PBICT was a TADF host, DBTTP1 was a triplet-exciton-guiding host,<sup>[11]</sup> TSPO1 was a hole-blocking layer, TPBi was an electron-transporting layer, LiF was an electron-injection layer, and Al served as a cathode. All devices were fabricated by thermal evaporation under  $5 \times 10^{-7}$  torr. Encapsulation was subsequently



conducted under a nitrogen atmosphere to prevent the degradation. The characteristics of devices were measured using a Keithley, 2400 source meter and a Konica Minolta, CS2000 spectroradiometer.

**Table S1.** Selected geometry parameters of the single crystal structures of Au(I) complexes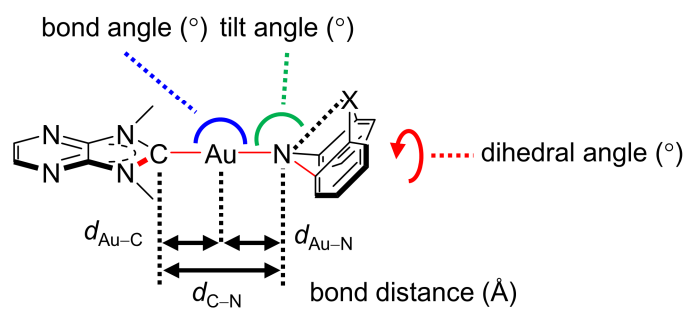

|                                  | bond length ( $\text{\AA}$ ) |                   |                  | bond angle ( $^{\circ}$ ) | dihedral angle ( $^{\circ}$ ) | tilt angle ( $^{\circ}$ ) |
|----------------------------------|------------------------------|-------------------|------------------|---------------------------|-------------------------------|---------------------------|
|                                  | $d_{\text{Au-C}}$            | $d_{\text{Au-N}}$ | $d_{\text{C-N}}$ |                           |                               |                           |
| [Au( <sup>Dipp</sup> PZI)(ACD)]  | 1.970(2)                     | 2.040(2)          | 4.010            | 179.4(1)                  | 10.7                          | 176.9                     |
| [Au( <sup>Dipp</sup> PZI)(Cz)]   | 1.982(5)                     | 2.021(4)          | 3.998            | 174.4(2)                  | 0.3                           | 172.2                     |
| [Au( <sup>Dipp</sup> PZI)(DPA)]  | 2.000(9)                     | 2.063(7)          | 4.062            | 176.7(3)                  | 24.1                          | not defined               |
| [Au( <sup>Dipp</sup> PZI)(DPAC)] | 1.956(6)                     | 2.036(5)          | 3.991            | 176.6(2)                  | 2.8                           | 178.4                     |
| [Au( <sup>Dipp</sup> PZI)(DMAC)] | 1.968(10)                    | 2.027(8)          | 3.993            | 178.7(4)                  | 3.5                           | 172.9                     |

**Table S2.** Crystallographic data for [Au<sup>(DippPZI)</sup>(ACD)]

|                                                     | [Au <sup>(DippPZI)</sup> (ACD)]                                 |
|-----------------------------------------------------|-----------------------------------------------------------------|
| Empirical formula                                   | C <sub>42</sub> H <sub>44</sub> AuN <sub>5</sub> O              |
| Formula weight                                      | 831.79                                                          |
| Temperature (K)                                     | 223(2)                                                          |
| Wavelength (Å)                                      | 0.71073                                                         |
| Crystal system                                      | monoclinic                                                      |
| Space group                                         | <i>P</i> 2 <sub>1</sub> / <i>n</i>                              |
| Unit cell dimensions                                |                                                                 |
| <i>a</i> (Å)                                        | 15.218(3)                                                       |
| <i>b</i> (Å)                                        | 14.128(3)                                                       |
| <i>c</i> (Å)                                        | 19.271(4)                                                       |
| <i>α</i> (°)                                        | 90                                                              |
| <i>β</i> (°)                                        | 111.515(6)                                                      |
| <i>γ</i> (°)                                        | 90                                                              |
| Volume (Å <sup>3</sup> )                            | 3854.5(15)                                                      |
| Z                                                   | 4                                                               |
| Calculated density (g cm <sup>-3</sup> )            | 1.433                                                           |
| Absorption coefficient (mm <sup>-1</sup> )          | 3.854                                                           |
| F(000)                                              | 1672                                                            |
| Crystal size (mm <sup>3</sup> )                     | 0.240 × 0.142 × 0.105                                           |
| Theta range for data collection                     | 2.135 to 28.412°.                                               |
| Index ranges                                        | -15 ≤ <i>h</i> ≤ 20, -18 ≤ <i>k</i> ≤ 18, -25 ≤ <i>l</i> ≤ 25   |
| Reflections collected                               | 84055                                                           |
| Independent reflections [ <i>R</i> (int)]           | 9595 [0.0593]                                                   |
| Completeness to theta = 25.242°                     | 99.90%                                                          |
| Absorption correction                               | Semi-empirical from equivalents                                 |
| Max. and min. transmission                          | 0.7457 and 0.6563                                               |
| Refinement method                                   | Full-matrix least-squares on <i>F</i> <sup>2</sup>              |
| Data / restraints / parameters                      | 9595 / 0 / 450                                                  |
| Goodness-of-fit on <i>F</i> <sup>2</sup>            | 1.03                                                            |
| Final <i>R</i> indices [ <i>I</i> > 2σ( <i>I</i> )] | <i>R</i> <sub>1</sub> = 0.0225, <i>wR</i> <sub>2</sub> = 0.0500 |
| <i>R</i> indices (all data)                         | <i>R</i> <sub>1</sub> = 0.0302, <i>wR</i> <sub>2</sub> = 0.0534 |
| Extinction coefficient                              | n/a                                                             |
| Largest diff. peak and hole (e Å <sup>-3</sup> )    | 0.461 and -0.416                                                |

**Table S3.** Selected bond distances and bond angles of [Au(Di<sup>pp</sup>PZI)(ACD)]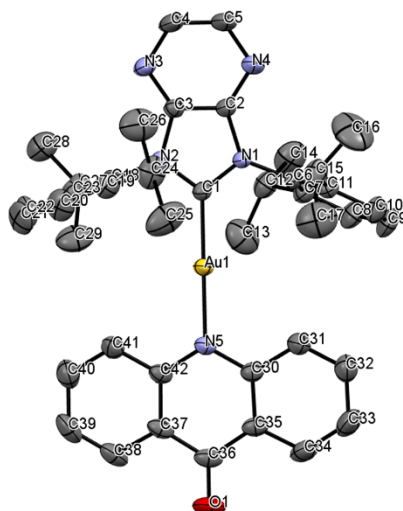

| bond distances (Å) |            |             |          | bond angles (°)  |            |                   |          |
|--------------------|------------|-------------|----------|------------------|------------|-------------------|----------|
| Au(1)-C(1)         | 1.970(2)   | C(30)-C(31) | 1.408(3) | C(1)-Au(1)-N(5)  | 179.42(9)  | C(19)-C(18)-C(23) | 124.1(2) |
| Au(1)-N(5)         | 2.0397(19) | C(30)-C(35) | 1.413(3) | C(1)-N(1)-C(2)   | 109.60(18) | C(19)-C(18)-N(2)  | 117.6(2) |
| O(1)-C(36)         | 1.245(3)   | C(31)-C(32) | 1.373(4) | C(1)-N(1)-C(6)   | 122.15(18) | C(23)-C(18)-N(2)  | 118.3(2) |
| N(1)-C(1)          | 1.357(3)   | C(32)-C(33) | 1.406(4) | C(2)-N(1)-C(6)   | 128.16(18) | C(20)-C(19)-C(18) | 116.7(3) |
| N(1)-C(2)          | 1.399(3)   | C(33)-C(34) | 1.359(4) | C(1)-N(2)-C(3)   | 109.83(19) | C(20)-C(19)-C(24) | 121.0(3) |
| N(1)-C(6)          | 1.460(3)   | C(34)-C(35) | 1.411(4) | C(1)-N(2)-C(18)  | 123.40(18) | C(18)-C(19)-C(24) | 122.3(2) |
| N(2)-C(1)          | 1.362(3)   | C(35)-C(36) | 1.460(4) | C(3)-N(2)-C(18)  | 126.37(18) | C(21)-C(20)-C(19) | 121.0(3) |
| N(2)-C(3)          | 1.391(3)   | C(36)-C(37) | 1.454(4) | C(3)-N(3)-C(4)   | 111.5(2)   | C(20)-C(21)-C(22) | 120.7(3) |
| N(2)-C(18)         | 1.442(3)   | C(37)-C(38) | 1.408(4) | C(2)-N(4)-C(5)   | 111.7(2)   | C(21)-C(22)-C(23) | 121.0(3) |
| N(3)-C(3)          | 1.328(3)   | C(37)-C(42) | 1.421(3) | C(42)-N(5)-C(30) | 118.40(19) | C(18)-C(23)-C(22) | 116.5(2) |
| N(3)-C(4)          | 1.342(3)   | C(38)-C(39) | 1.360(4) | C(42)-N(5)-Au(1) | 121.27(15) | C(18)-C(23)-C(27) | 122.2(2) |
| N(4)-C(2)          | 1.328(3)   | C(39)-C(40) | 1.410(4) | C(30)-N(5)-Au(1) | 120.31(15) | C(22)-C(23)-C(27) | 121.2(2) |
| N(4)-C(5)          | 1.347(3)   | C(40)-C(41) | 1.370(4) | N(1)-C(1)-N(2)   | 107.15(18) | C(26)-C(24)-C(19) | 111.1(3) |
| N(5)-C(42)         | 1.373(3)   | C(41)-C(42) | 1.419(3) | N(1)-C(1)-Au(1)  | 127.21(16) | C(26)-C(24)-C(25) | 111.9(3) |
| N(5)-C(30)         | 1.387(3)   |             |          | N(2)-C(1)-Au(1)  | 125.61(16) | C(19)-C(24)-C(25) | 110.9(3) |
| C(2)-C(3)          | 1.386(3)   |             |          | N(4)-C(2)-C(3)   | 124.1(2)   | C(23)-C(27)-C(28) | 112.3(2) |
| C(4)-C(5)          | 1.394(4)   |             |          | N(4)-C(2)-N(1)   | 129.2(2)   | C(23)-C(27)-C(29) | 110.9(2) |
| C(6)-C(11)         | 1.394(3)   |             |          | C(3)-C(2)-N(1)   | 106.71(19) | C(28)-C(27)-C(29) | 110.9(2) |
| C(6)-C(7)          | 1.398(3)   |             |          | N(3)-C(3)-C(2)   | 124.9(2)   | N(5)-C(30)-C(31)  | 119.5(2) |
| C(7)-C(8)          | 1.392(3)   |             |          | N(3)-C(3)-N(2)   | 128.4(2)   | N(5)-C(30)-C(35)  | 122.6(2) |
| C(7)-C(12)         | 1.520(4)   |             |          | C(2)-C(3)-N(2)   | 106.69(19) | C(31)-C(30)-C(35) | 117.9(2) |
| C(8)-C(9)          | 1.382(4)   |             |          | N(3)-C(4)-C(5)   | 123.8(2)   | C(32)-C(31)-C(30) | 121.3(2) |
| C(9)-C(10)         | 1.377(4)   |             |          | N(4)-C(5)-C(4)   | 123.8(2)   | C(31)-C(32)-C(33) | 120.3(3) |
| C(10)-C(11)        | 1.404(3)   |             |          | C(11)-C(6)-C(7)  | 124.2(2)   | C(34)-C(33)-C(32) | 119.6(3) |
| C(11)-C(15)        | 1.514(4)   |             |          | C(11)-C(6)-N(1)  | 117.9(2)   | C(33)-C(34)-C(35) | 121.3(3) |
| C(12)-C(14)        | 1.528(4)   |             |          | C(7)-C(6)-N(1)   | 117.8(2)   | C(34)-C(35)-C(30) | 119.6(2) |
| C(12)-C(13)        | 1.538(4)   |             |          | C(8)-C(7)-C(6)   | 116.4(2)   | C(34)-C(35)-C(36) | 119.9(2) |
| C(15)-C(16)        | 1.512(5)   |             |          | C(8)-C(7)-C(12)  | 120.1(2)   | C(30)-C(35)-C(36) | 120.5(2) |
| C(15)-C(17)        | 1.515(5)   |             |          | C(6)-C(7)-C(12)  | 123.4(2)   | O(1)-C(36)-C(37)  | 122.4(3) |
| C(18)-C(19)        | 1.393(3)   |             |          | C(9)-C(8)-C(7)   | 121.2(3)   | O(1)-C(36)-C(35)  | 122.7(3) |
| C(18)-C(23)        | 1.393(3)   |             |          | C(10)-C(9)-C(8)  | 120.9(2)   | C(37)-C(36)-C(35) | 114.9(2) |
| C(19)-C(20)        | 1.389(4)   |             |          | C(9)-C(10)-C(11) | 120.6(3)   | C(38)-C(37)-C(42) | 119.2(3) |
| C(19)-C(24)        | 1.523(4)   |             |          | C(6)-C(11)-C(10) | 116.6(2)   | C(38)-C(37)-C(36) | 119.8(2) |
| C(20)-C(21)        | 1.376(5)   |             |          | C(6)-C(11)-C(15) | 123.5(2)   | C(42)-C(37)-C(36) | 120.9(2) |

# WILEY-VCH

|             |          |                   |          |                   |          |
|-------------|----------|-------------------|----------|-------------------|----------|
| C(21)-C(22) | 1.379(4) | C(10)-C(11)-C(15) | 119.9(2) | C(39)-C(38)-C(37) | 121.4(3) |
| C(22)-C(23) | 1.393(4) | C(7)-C(12)-C(14)  | 112.3(2) | C(38)-C(39)-C(40) | 119.8(3) |
| C(23)-C(27) | 1.519(3) | C(7)-C(12)-C(13)  | 110.4(2) | C(41)-C(40)-C(39) | 120.4(3) |
| C(24)-C(26) | 1.521(5) | C(14)-C(12)-C(13) | 110.0(3) | C(40)-C(41)-C(42) | 120.8(3) |
| C(24)-C(25) | 1.525(4) | C(16)-C(15)-C(11) | 110.8(3) | N(5)-C(42)-C(41)  | 119.5(2) |
| C(27)-C(28) | 1.528(4) | C(16)-C(15)-C(17) | 111.0(3) | N(5)-C(42)-C(37)  | 122.2(2) |
| C(27)-C(29) | 1.528(4) | C(11)-C(15)-C(17) | 111.7(2) | C(41)-C(42)-C(37) | 118.3(2) |

---

**Table S4.** Crystallographic data for [Au(<sup>Dipp</sup>PZI)(Cz)]

|                                                     | [Au( <sup>Dipp</sup> PZI)(Cz)]                                  |
|-----------------------------------------------------|-----------------------------------------------------------------|
| Empirical formula                                   | C <sub>41</sub> H <sub>44</sub> AuN <sub>5</sub>                |
| Formula weight                                      | 803.78                                                          |
| Temperature (K)                                     | 223(2)                                                          |
| Wavelength (Å)                                      | 0.71073                                                         |
| Crystal system                                      | triclinic                                                       |
| Space group                                         | <i>P</i> -1                                                     |
| Unit cell dimensions                                |                                                                 |
| <i>a</i> (Å)                                        | 14.649(9)                                                       |
| <i>b</i> (Å)                                        | 17.043(10)                                                      |
| <i>c</i> (Å)                                        | 30.319(18)                                                      |
| α (°)                                               | 89.146(19)                                                      |
| β (°)                                               | 82.470(19)                                                      |
| γ (°)                                               | 88.197(19)                                                      |
| Volume (Å <sup>3</sup> )                            | 7500(8)                                                         |
| Z                                                   | 8                                                               |
| Calculated density (g cm <sup>-3</sup> )            | 1.424                                                           |
| Absorption coefficient (mm <sup>-1</sup> )          | 3.957                                                           |
| F(000)                                              | 3232                                                            |
| Crystal size (mm <sup>3</sup> )                     | 0.190 × 0.165 × 0.150                                           |
| Theta range for data collection                     | 1.797 to 28.232°                                                |
| Index ranges                                        | -19 ≤ <i>h</i> ≤ 19, -22 ≤ <i>k</i> ≤ 22, -40 ≤ <i>l</i> ≤ 40   |
| Reflections collected                               | 348632                                                          |
| Independent reflections [ <i>R</i> (int)]           | 36720 [0.1464]                                                  |
| Completeness to theta = 25.242°                     | 100.00%                                                         |
| Absorption correction                               | Semi-empirical from equivalents                                 |
| Max. and min. transmission                          | 0.7457 and 0.6110                                               |
| Refinement method                                   | Full-matrix least-squares on <i>F</i> <sup>2</sup>              |
| Data / restraints / parameters                      | 36720 / 0 / 1724                                                |
| Goodness-of-fit on <i>F</i> <sup>2</sup>            | 1.009                                                           |
| Final <i>R</i> indices [ <i>I</i> > 2σ( <i>I</i> )] | <i>R</i> <sub>1</sub> = 0.0459, <i>wR</i> <sub>2</sub> = 0.0696 |
| <i>R</i> indices (all data)                         | <i>R</i> <sub>1</sub> = 0.1098, <i>wR</i> <sub>2</sub> = 0.0846 |
| Extinction coefficient                              | n/a                                                             |
| Largest diff. peak and hole (e Å <sup>-3</sup> )    | 0.950 and -1.818                                                |

**Table S5.** Selected bond distances and bond angles of [Au(Di<sup>pp</sup>PZI)(Cz)]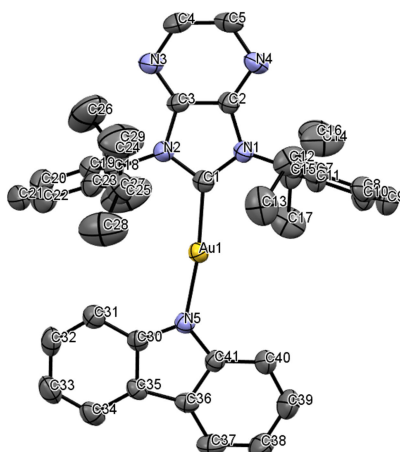

| bond distances (Å) |          |             |          | bond angles (°)  |            |                   |          |
|--------------------|----------|-------------|----------|------------------|------------|-------------------|----------|
| Au(1)-C(1)         | 1.985(5) | C(24)-C(25) | 1.511(8) | C(1)-Au(1)-N(5)  | 172.26(19) | C(11)-C(15)-C(17) | 111.1(5) |
| Au(1)-N(5)         | 2.022(4) | C(27)-C(29) | 1.502(9) | C(1)-N(1)-C(2)   | 109.9(4)   | C(11)-C(15)-C(16) | 110.0(5) |
| N(1)-C(1)          | 1.372(6) | C(27)-C(28) | 1.518(8) | C(1)-N(1)-C(6)   | 124.2(4)   | C(17)-C(15)-C(16) | 111.7(5) |
| N(1)-C(2)          | 1.403(6) | C(30)-C(31) | 1.400(7) | C(2)-N(1)-C(6)   | 125.8(4)   | C(23)-C(18)-C(19) | 123.9(5) |
| N(1)-C(6)          | 1.448(6) | C(30)-C(35) | 1.419(6) | C(1)-N(2)-C(3)   | 110.2(4)   | C(23)-C(18)-N(2)  | 118.4(5) |
| N(2)-C(1)          | 1.370(6) | C(31)-C(32) | 1.381(7) | C(1)-N(2)-C(18)  | 123.5(4)   | C(19)-C(18)-N(2)  | 117.7(5) |
| N(2)-C(3)          | 1.397(6) | C(32)-C(33) | 1.397(8) | C(3)-N(2)-C(18)  | 126.2(4)   | C(18)-C(19)-C(20) | 116.5(6) |
| N(2)-C(18)         | 1.459(6) | C(33)-C(34) | 1.374(8) | C(3)-N(3)-C(4)   | 111.7(5)   | C(18)-C(19)-C(24) | 122.1(5) |
| N(3)-C(3)          | 1.322(6) | C(34)-C(35) | 1.407(7) | C(2)-N(4)-C(5)   | 111.7(5)   | C(20)-C(19)-C(24) | 121.3(6) |
| N(3)-C(4)          | 1.340(7) | C(35)-C(36) | 1.435(7) | C(30)-N(5)-C(41) | 105.9(4)   | C(21)-C(20)-C(19) | 120.8(7) |
| N(4)-C(2)          | 1.329(6) | C(36)-C(37) | 1.413(7) | C(30)-N(5)-Au(1) | 121.8(3)   | C(22)-C(21)-C(20) | 121.0(7) |
| N(4)-C(5)          | 1.345(7) | C(36)-C(41) | 1.434(6) | C(41)-N(5)-Au(1) | 131.7(3)   | C(21)-C(22)-C(23) | 120.7(7) |
| N(5)-C(30)         | 1.391(6) | C(37)-C(38) | 1.371(8) | N(2)-C(1)-N(1)   | 106.4(4)   | C(18)-C(23)-C(22) | 117.0(6) |
| N(5)-C(41)         | 1.393(6) | C(38)-C(39) | 1.405(8) | N(2)-C(1)-Au(1)  | 122.8(4)   | C(18)-C(23)-C(27) | 122.1(5) |
| C(2)-C(3)          | 1.389(7) | C(39)-C(40) | 1.383(7) | N(1)-C(1)-Au(1)  | 130.6(4)   | C(22)-C(23)-C(27) | 120.9(6) |
| C(4)-C(5)          | 1.405(8) | C(40)-C(41) | 1.392(7) | N(4)-C(2)-C(3)   | 124.3(5)   | C(26)-C(24)-C(25) | 110.3(6) |
| C(6)-C(11)         | 1.397(7) |             |          | N(4)-C(2)-N(1)   | 129.0(5)   | C(26)-C(24)-C(19) | 112.8(6) |
| C(6)-C(7)          | 1.405(7) |             |          | C(3)-C(2)-N(1)   | 106.7(4)   | C(25)-C(24)-C(19) | 111.4(6) |
| C(7)-C(8)          | 1.385(7) |             |          | N(3)-C(3)-C(2)   | 124.9(5)   | C(29)-C(27)-C(23) | 112.5(6) |
| C(7)-C(12)         | 1.516(7) |             |          | N(3)-C(3)-N(2)   | 128.3(5)   | C(29)-C(27)-C(28) | 110.6(6) |

|             |          |                   |          |                   |          |
|-------------|----------|-------------------|----------|-------------------|----------|
| C(8)-C(9)   | 1.367(8) | C(2)-C(3)-N(2)    | 106.8(4) | C(23)-C(27)-C(28) | 113.4(6) |
| C(9)-C(10)  | 1.378(8) | N(3)-C(4)-C(5)    | 123.8(5) | N(5)-C(30)-C(31)  | 128.0(5) |
| C(10)-C(11) | 1.386(7) | N(4)-C(5)-C(4)    | 123.6(5) | N(5)-C(30)-C(35)  | 111.5(4) |
| C(10)-H(10) | 0.94     | C(11)-C(6)-C(7)   | 123.4(5) | C(31)-C(30)-C(35) | 120.5(5) |
| C(11)-C(15) | 1.519(7) | C(11)-C(6)-N(1)   | 118.6(5) | C(32)-C(31)-C(30) | 118.2(5) |
| C(12)-C(14) | 1.527(8) | C(7)-C(6)-N(1)    | 117.9(4) | C(31)-C(32)-C(33) | 121.6(5) |
| C(12)-C(13) | 1.551(8) | C(8)-C(7)-C(6)    | 116.3(5) | C(34)-C(35)-C(36) | 134.3(5) |
| C(15)-C(17) | 1.533(7) | C(8)-C(7)-C(12)   | 122.3(5) | C(30)-C(35)-C(36) | 105.8(4) |
| C(15)-C(16) | 1.537(7) | C(6)-C(7)-C(12)   | 121.4(5) | C(37)-C(36)-C(41) | 118.5(5) |
| C(18)-C(23) | 1.387(7) | C(9)-C(8)-C(7)    | 122.0(6) | C(37)-C(36)-C(35) | 135.3(5) |
| C(18)-C(19) | 1.390(7) | C(8)-C(9)-C(10)   | 120.1(6) | C(41)-C(36)-C(35) | 106.2(4) |
| C(19)-C(20) | 1.398(8) | C(9)-C(10)-C(11)  | 121.6(6) | C(38)-C(37)-C(36) | 120.2(5) |
| C(19)-C(24) | 1.519(8) | C(10)-C(11)-C(6)  | 116.6(5) | C(37)-C(38)-C(39) | 120.1(5) |
| C(20)-C(21) | 1.380(9) | C(10)-C(11)-C(15) | 120.9(5) | C(40)-C(39)-C(38) | 121.8(6) |
| C(21)-C(22) | 1.365(9) | C(6)-C(11)-C(15)  | 122.5(5) | C(39)-C(40)-C(41) | 118.5(5) |
| C(22)-C(23) | 1.399(8) | C(7)-C(12)-C(14)  | 113.8(6) | C(40)-C(41)-N(5)  | 128.7(5) |
| C(23)-C(27) | 1.516(8) | C(7)-C(12)-C(13)  | 110.9(5) | C(40)-C(41)-C(36) | 120.8(5) |
| C(24)-C(26) | 1.501(8) | C(14)-C(12)-C(13) | 109.9(5) | N(5)-C(41)-C(36)  | 110.5(4) |

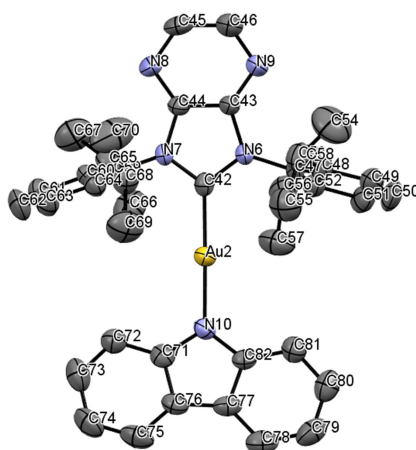

| bond distances (Å) |          |             | bond angles (°) |                   |            |                   |          |
|--------------------|----------|-------------|-----------------|-------------------|------------|-------------------|----------|
| Au(2)-C(42)        | 1.982(5) | C(71)-C(72) | 1.391(7)        | C(42)-Au(2)-N(10) | 174.41(18) | C(57)-C(56)-C(58) | 109.5(5) |



|             |          |             |          |                   |          |                   |          |
|-------------|----------|-------------|----------|-------------------|----------|-------------------|----------|
| Au(2)-N(10) | 2.021(4) | C(71)-C(76) | 1.424(7) | C(42)-N(6)-C(43)  | 109.8(4) | C(60)-C(59)-C(64) | 124.1(5) |
| N(6)-C(42)  | 1.373(6) | C(72)-C(73) | 1.384(7) | C(42)-N(6)-C(47)  | 125.0(4) | C(60)-C(59)-N(7)  | 118.3(5) |
| N(6)-C(43)  | 1.399(6) | C(73)-C(74) | 1.400(8) | C(43)-N(6)-C(47)  | 125.1(4) | C(64)-C(59)-N(7)  | 117.6(5) |
| N(6)-C(47)  | 1.446(6) | C(74)-C(75) | 1.368(8) | C(42)-N(7)-C(44)  | 109.7(4) | C(59)-C(60)-C(61) | 116.2(5) |
| N(7)-C(42)  | 1.368(6) | C(75)-C(76) | 1.414(7) | C(42)-N(7)-C(59)  | 124.2(4) | C(59)-C(60)-C(65) | 121.3(5) |
| N(7)-C(44)  | 1.399(6) | C(76)-C(77) | 1.432(7) | C(44)-N(7)-C(59)  | 125.9(4) | C(61)-C(60)-C(65) | 122.4(5) |
| N(7)-C(59)  | 1.455(6) | C(77)-C(78) | 1.407(7) | C(44)-N(8)-C(45)  | 110.5(5) | C(62)-C(61)-C(60) | 121.6(6) |
| N(8)-C(44)  | 1.332(6) | C(77)-C(82) | 1.422(7) | C(43)-N(9)-C(46)  | 111.1(5) | C(63)-C(62)-C(61) | 120.7(6) |
| N(8)-C(45)  | 1.357(7) | C(78)-C(79) | 1.389(8) | C(82)-N(10)-C(71) | 106.6(4) | C(62)-C(63)-C(64) | 121.6(6) |
| N(9)-C(43)  | 1.326(6) | C(79)-C(80) | 1.405(8) | C(82)-N(10)-Au(2) | 128.4(3) | C(63)-C(64)-C(59) | 115.8(5) |
| N(9)-C(46)  | 1.348(7) | C(80)-C(81) | 1.377(7) | C(71)-N(10)-Au(2) | 124.2(3) | C(63)-C(64)-C(68) | 122.4(5) |
| N(10)-C(82) | 1.388(6) | C(81)-C(82) | 1.390(7) | N(7)-C(42)-N(6)   | 106.5(4) | C(59)-C(64)-C(68) | 121.7(5) |
| N(10)-C(71) | 1.393(6) |             |          | N(7)-C(42)-Au(2)  | 126.7(4) | C(66)-C(65)-C(60) | 110.2(5) |
| C(43)-C(44) | 1.381(7) |             |          | N(6)-C(42)-Au(2)  | 126.2(4) | C(66)-C(65)-C(67) | 110.4(5) |
| C(45)-C(46) | 1.377(8) |             |          | N(9)-C(43)-C(44)  | 125.0(5) | C(60)-C(65)-C(67) | 112.7(5) |
| C(47)-C(48) | 1.386(7) |             |          | N(9)-C(43)-N(6)   | 128.2(5) | C(70)-C(68)-C(69) | 114.0(6) |
| C(47)-C(52) | 1.398(7) |             |          | C(44)-C(43)-N(6)  | 106.7(4) | C(70)-C(68)-C(64) | 111.5(5) |
| C(48)-C(49) | 1.408(8) |             |          | N(8)-C(44)-C(43)  | 124.8(4) | C(69)-C(68)-C(64) | 111.6(5) |
| C(48)-C(53) | 1.533(8) |             |          | N(8)-C(44)-N(7)   | 128.0(5) | C(72)-C(71)-N(10) | 128.4(5) |
| C(49)-C(50) | 1.376(8) |             |          | C(43)-C(44)-N(7)  | 107.2(4) | C(72)-C(71)-C(76) | 120.9(5) |
| C(50)-C(51) | 1.368(8) |             |          | N(8)-C(45)-C(46)  | 124.6(5) | N(10)-C(71)-C(76) | 110.7(5) |
| C(51)-C(52) | 1.391(7) |             |          | N(9)-C(46)-C(45)  | 124.0(5) | C(73)-C(72)-C(71) | 117.9(5) |
| C(52)-C(56) | 1.520(8) |             |          | C(48)-C(47)-C(52) | 123.6(5) | C(72)-C(73)-C(74) | 122.7(6) |
| C(53)-C(54) | 1.521(8) |             |          | C(48)-C(47)-N(6)  | 117.9(5) | C(75)-C(74)-C(73) | 119.3(6) |
| C(53)-C(55) | 1.536(8) |             |          | C(52)-C(47)-N(6)  | 118.5(5) | C(74)-C(75)-C(76) | 120.4(6) |
| C(56)-C(57) | 1.539(7) |             |          | C(47)-C(48)-C(49) | 116.7(6) | C(75)-C(76)-C(71) | 118.7(6) |
| C(56)-C(58) | 1.551(8) |             |          | C(47)-C(48)-C(53) | 122.7(5) | C(75)-C(76)-C(77) | 135.7(5) |
| C(59)-C(60) | 1.391(7) |             |          | C(49)-C(48)-C(53) | 120.6(6) | C(71)-C(76)-C(77) | 105.6(5) |
| C(59)-C(64) | 1.412(7) |             |          | C(50)-C(49)-C(48) | 120.4(6) | C(78)-C(77)-C(82) | 118.9(6) |

|             |          |                   |          |                   |          |
|-------------|----------|-------------------|----------|-------------------|----------|
| C(60)-C(61) | 1.394(7) | C(51)-C(50)-C(49) | 121.5(6) | C(78)-C(77)-C(76) | 134.0(5) |
| C(60)-C(65) | 1.526(7) | C(50)-C(51)-C(52) | 120.5(6) | C(82)-C(77)-C(76) | 107.1(5) |
| C(61)-C(62) | 1.373(8) | C(51)-C(52)-C(47) | 117.3(6) | C(79)-C(78)-C(77) | 119.4(6) |
| C(62)-C(63) | 1.368(8) | C(51)-C(52)-C(56) | 119.6(6) | C(78)-C(79)-C(80) | 120.2(6) |
| C(63)-C(64) | 1.395(7) | C(47)-C(52)-C(56) | 123.1(5) | C(81)-C(80)-C(79) | 121.7(6) |
| C(64)-C(68) | 1.516(7) | C(54)-C(53)-C(48) | 112.9(6) | C(80)-C(81)-C(82) | 118.4(5) |
| C(65)-C(66) | 1.524(7) | C(54)-C(53)-C(55) | 110.8(6) | N(10)-C(82)-C(81) | 128.6(5) |
| C(65)-C(67) | 1.534(8) | C(48)-C(53)-C(55) | 110.0(5) | N(10)-C(82)-C(77) | 110.0(5) |
| C(68)-C(70) | 1.499(8) | C(52)-C(56)-C(57) | 112.2(5) | C(81)-C(82)-C(77) | 121.4(5) |
| C(68)-C(69) | 1.514(7) | C(52)-C(56)-C(58) | 111.2(5) |                   |          |

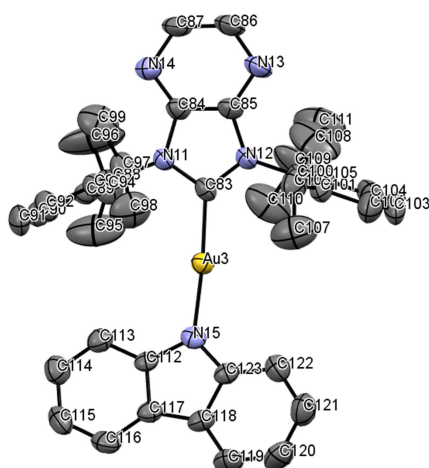

| bond distances (Å) |          |               |          | bond angles (°)    |            |                      |          |
|--------------------|----------|---------------|----------|--------------------|------------|----------------------|----------|
| Au(3)-C(83)        | 1.977(5) | C(112)-C(113) | 1.398(7) | C(83)-Au(3)-N(15)  | 174.72(18) | C(99)-C(97)-C(98)    | 110.8(5) |
| Au(3)-N(15)        | 2.009(4) | C(112)-C(117) | 1.401(7) | C(83)-N(11)-C(84)  | 109.4(4)   | C(105)-C(100)-C(101) | 124.7(6) |
| N(11)-C(83)        | 1.369(6) | C(113)-C(114) | 1.385(7) | C(83)-N(11)-C(88)  | 122.7(4)   | C(105)-C(100)-N(12)  | 117.5(5) |
| N(11)-C(84)        | 1.397(6) | C(114)-C(115) | 1.393(8) | C(84)-N(11)-C(88)  | 127.1(4)   | C(101)-C(100)-N(12)  | 117.8(5) |
| N(11)-C(88)        | 1.449(6) | C(115)-C(116) | 1.380(8) | C(83)-N(12)-C(85)  | 109.3(4)   | C(102)-C(101)-C(100) | 116.3(6) |
| N(12)-C(83)        | 1.365(6) | C(116)-C(117) | 1.414(7) | C(83)-N(12)-C(100) | 123.8(4)   | C(102)-C(101)-C(106) | 120.6(6) |
| N(12)-C(85)        | 1.389(6) | C(117)-C(118) | 1.440(7) | C(85)-N(12)-C(100) | 126.9(4)   | C(100)-C(101)-C(106) | 123.0(5) |
| N(12)-C(100)       | 1.442(6) | C(118)-C(119) | 1.389(7) | C(85)-N(13)-C(86)  | 111.9(5)   | C(103)-C(102)-C(101) | 120.1(7) |

|               |           |               |          |                     |          |                      |          |
|---------------|-----------|---------------|----------|---------------------|----------|----------------------|----------|
| N(13)-C(85)   | 1.330(6)  | C(118)-C(123) | 1.428(7) | C(84)-N(14)-C(87)   | 110.0(5) | C(104)-C(103)-C(102) | 121.8(7) |
| N(13)-C(86)   | 1.341(7)  | C(119)-C(120) | 1.382(8) | C(123)-N(15)-C(112) | 106.1(4) | C(103)-C(104)-C(105) | 121.7(7) |
| N(14)-C(84)   | 1.330(6)  | C(120)-C(121) | 1.389(8) | C(123)-N(15)-Au(3)  | 130.4(4) | C(100)-C(105)-C(104) | 115.3(6) |
| N(14)-C(87)   | 1.343(6)  | C(121)-C(122) | 1.384(8) | C(112)-N(15)-Au(3)  | 122.8(3) | C(100)-C(105)-C(109) | 123.3(7) |
| N(15)-C(123)  | 1.381(6)  | C(122)-C(123) | 1.395(7) | N(12)-C(83)-N(11)   | 107.2(4) | C(104)-C(105)-C(109) | 121.3(7) |
| N(15)-C(112)  | 1.404(6)  |               |          | N(12)-C(83)-Au(3)   | 129.4(4) | C(107)-C(106)-C(108) | 111.3(6) |
| C(84)-C(85)   | 1.383(7)  |               |          | N(11)-C(83)-Au(3)   | 123.0(4) | C(107)-C(106)-C(101) | 114.0(5) |
| C(86)-C(87)   | 1.401(8)  |               |          | N(14)-C(84)-C(85)   | 125.6(5) | C(108)-C(106)-C(101) | 110.8(6) |
| C(88)-C(89)   | 1.399(7)  |               |          | N(14)-C(84)-N(11)   | 127.8(5) | C(110)-C(109)-C(111) | 122.7(7) |
| C(88)-C(93)   | 1.412(7)  |               |          | C(85)-C(84)-N(11)   | 106.6(5) | C(110)-C(109)-C(105) | 115.3(6) |
| C(89)-C(90)   | 1.403(7)  |               |          | N(13)-C(85)-C(84)   | 124.2(5) | C(111)-C(109)-C(105) | 114.7(7) |
| C(89)-C(94)   | 1.527(7)  |               |          | N(13)-C(85)-N(12)   | 128.2(5) | C(113)-C(112)-C(117) | 121.1(5) |
| C(90)-C(91)   | 1.371(8)  |               |          | C(84)-C(85)-N(12)   | 107.6(5) | C(113)-C(112)-N(15)  | 128.0(5) |
| C(91)-C(92)   | 1.379(8)  |               |          | N(13)-C(86)-C(87)   | 122.9(5) | C(117)-C(112)-N(15)  | 110.8(5) |
| C(92)-C(93)   | 1.386(7)  |               |          | N(14)-C(87)-C(86)   | 125.3(6) | C(114)-C(113)-C(112) | 118.6(5) |
| C(93)-C(97)   | 1.517(7)  |               |          | C(89)-C(88)-C(93)   | 123.8(5) | C(113)-C(114)-C(115) | 120.6(6) |
| C(94)-C(96)   | 1.469(9)  |               |          | C(89)-C(88)-N(11)   | 118.9(4) | C(116)-C(115)-C(114) | 121.7(6) |
| C(94)-C(95)   | 1.505(9)  |               |          | C(93)-C(88)-N(11)   | 117.3(4) | C(115)-C(116)-C(117) | 118.3(5) |
| C(97)-C(99)   | 1.525(8)  |               |          | C(88)-C(89)-C(90)   | 116.5(5) | C(112)-C(117)-C(116) | 119.7(5) |
| C(97)-C(98)   | 1.529(8)  |               |          | C(88)-C(89)-C(94)   | 122.4(5) | C(112)-C(117)-C(118) | 106.6(5) |
| C(100)-C(105) | 1.395(8)  |               |          | C(90)-C(89)-C(94)   | 121.0(5) | C(116)-C(117)-C(118) | 133.7(5) |
| C(100)-C(101) | 1.404(7)  |               |          | C(91)-C(90)-C(89)   | 120.9(5) | C(119)-C(118)-C(123) | 119.2(6) |
| C(101)-C(102) | 1.398(8)  |               |          | C(90)-C(91)-C(92)   | 121.0(6) | C(119)-C(118)-C(117) | 135.0(6) |
| C(101)-C(106) | 1.515(8)  |               |          | C(91)-C(92)-C(93)   | 121.7(6) | C(123)-C(118)-C(117) | 105.7(5) |
| C(102)-C(103) | 1.379(9)  |               |          | C(92)-C(93)-C(88)   | 116.2(5) | C(120)-C(119)-C(118) | 119.8(6) |
| C(103)-C(104) | 1.360(10) |               |          | C(92)-C(93)-C(97)   | 121.7(5) | C(119)-C(120)-C(121) | 120.6(6) |
| C(104)-C(105) | 1.399(9)  |               |          | C(88)-C(93)-C(97)   | 122.1(5) | C(122)-C(121)-C(120) | 121.2(6) |
| C(105)-C(109) | 1.532(9)  |               |          | C(96)-C(94)-C(95)   | 109.2(6) | C(121)-C(122)-C(123) | 118.7(6) |
| C(106)-C(107) | 1.506(8)  |               |          | C(96)-C(94)-C(89)   | 111.9(6) | N(15)-C(123)-C(122)  | 128.8(5) |

|               |          |                       |          |                          |          |
|---------------|----------|-----------------------|----------|--------------------------|----------|
| C(106)-C(108) | 1.512(8) | C(95)-C(94)-<br>C(89) | 112.8(6) | N(15)-C(123)-<br>C(118)  | 110.8(5) |
| C(109)-C(110) | 1.427(9) | C(93)-C(97)-<br>C(99) | 111.1(5) | C(122)-C(123)-<br>C(118) | 120.4(5) |
| C(109)-C(111) | 1.440(8) | C(93)-C(97)-<br>C(98) | 111.6(5) |                          |          |

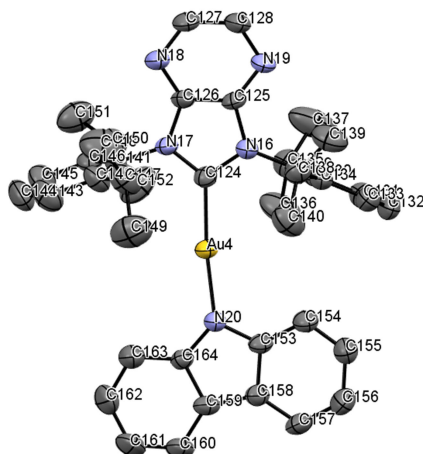

| bond distances (Å) |          |                   |          | bond angles (°)         |            |                          |          |
|--------------------|----------|-------------------|----------|-------------------------|------------|--------------------------|----------|
| Au(4)-C(124)       | 1.974(5) | C(153)-<br>C(154) | 1.400(7) | C(124)-Au(4)-<br>N(20)  | 172.34(19) | C(140)-C(138)-<br>C(134) | 111.3(5) |
| Au(4)-N(20)        | 1.999(4) | C(153)-<br>C(158) | 1.420(7) | C(124)-N(16)-<br>C(125) | 109.0(4)   | C(142)-C(141)-<br>C(146) | 124.4(5) |
| N(16)-C(124)       | 1.369(6) | C(154)-<br>C(155) | 1.370(7) | C(124)-N(16)-<br>C(129) | 123.9(4)   | C(142)-C(141)-<br>N(17)  | 117.3(5) |
| N(16)-C(125)       | 1.395(6) | C(155)-<br>C(156) | 1.397(8) | C(125)-N(16)-<br>C(129) | 127.0(4)   | C(146)-C(141)-<br>N(17)  | 118.3(5) |
| N(16)-C(129)       | 1.442(6) | C(156)-<br>C(157) | 1.368(8) | C(124)-N(17)-<br>C(126) | 110.1(4)   | C(141)-C(142)-<br>C(143) | 116.0(6) |
| N(17)-C(124)       | 1.358(6) | C(157)-<br>C(158) | 1.397(7) | C(124)-N(17)-<br>C(141) | 123.5(4)   | C(141)-C(142)-<br>C(147) | 123.5(6) |
| N(17)-C(126)       | 1.384(6) | C(158)-<br>C(159) | 1.436(7) | C(126)-N(17)-<br>C(141) | 126.0(4)   | C(143)-C(142)-<br>C(147) | 120.5(6) |
| N(17)-C(141)       | 1.456(6) | C(159)-<br>C(160) | 1.395(7) | C(126)-N(18)-<br>C(127) | 111.6(5)   | C(144)-C(143)-<br>C(142) | 121.3(6) |
| N(18)-C(126)       | 1.317(6) | C(159)-<br>C(164) | 1.425(7) | C(125)-N(19)-<br>C(128) | 111.2(5)   | C(143)-C(144)-<br>C(145) | 120.6(7) |
| N(18)-C(127)       | 1.345(6) | C(160)-<br>C(161) | 1.370(8) | C(153)-N(20)-<br>C(164) | 106.0(4)   | C(144)-C(145)-<br>C(146) | 121.6(6) |
| N(19)-C(125)       | 1.328(6) | C(161)-<br>C(162) | 1.393(8) | C(153)-N(20)-<br>Au(4)  | 121.8(3)   | C(145)-C(146)-<br>C(141) | 116.1(5) |
| N(19)-C(128)       | 1.353(6) | C(162)-<br>C(163) | 1.381(8) | C(164)-N(20)-<br>Au(4)  | 132.2(3)   | C(145)-C(146)-<br>C(150) | 121.5(5) |
| N(20)-C(153)       | 1.387(6) | C(163)-<br>C(164) | 1.397(7) | N(17)-C(124)-<br>N(16)  | 107.2(4)   | C(141)-C(146)-<br>C(150) | 122.4(5) |
| N(20)-C(164)       | 1.392(6) |                   |          | N(17)-C(124)-<br>Au(4)  | 128.9(4)   | C(142)-C(147)-<br>C(148) | 111.5(6) |
| C(125)-C(126)      | 1.394(7) |                   |          | N(16)-C(124)-<br>Au(4)  | 122.9(4)   | C(142)-C(147)-<br>C(149) | 112.0(6) |

|               |          |                          |          |                          |          |
|---------------|----------|--------------------------|----------|--------------------------|----------|
| C(127)-C(128) | 1.395(7) | N(19)-C(125)-<br>C(126)  | 124.9(5) | C(148)-C(147)-<br>C(149) | 109.6(5) |
| C(129)-C(134) | 1.401(7) | N(19)-C(125)-<br>N(16)   | 128.0(5) | C(146)-C(150)-<br>C(151) | 113.9(5) |
| C(129)-C(130) | 1.408(7) | C(126)-C(125)-<br>N(16)  | 107.0(4) | C(146)-C(150)-<br>C(152) | 111.2(5) |
| C(130)-C(131) | 1.409(8) | N(18)-C(126)-<br>N(17)   | 129.0(5) | C(151)-C(150)-<br>C(152) | 109.5(5) |
| C(130)-C(135) | 1.505(8) | N(18)-C(126)-<br>C(125)  | 124.4(5) | N(20)-C(153)-<br>C(154)  | 127.9(5) |
| C(131)-C(132) | 1.374(8) | N(17)-C(126)-<br>C(125)  | 106.5(4) | N(20)-C(153)-<br>C(158)  | 111.2(5) |
| C(132)-C(133) | 1.378(8) | N(18)-C(127)-<br>C(128)  | 124.3(5) | C(154)-C(153)-<br>C(158) | 120.9(5) |
| C(133)-C(134) | 1.393(7) | N(19)-C(128)-<br>C(127)  | 123.4(5) | C(155)-C(154)-<br>C(153) | 118.1(5) |
| C(134)-C(138) | 1.534(7) | C(134)-C(129)-<br>C(130) | 123.4(5) | C(154)-C(155)-<br>C(156) | 121.6(6) |
| C(135)-C(136) | 1.526(7) | C(134)-C(129)-<br>N(16)  | 118.1(4) | C(157)-C(156)-<br>C(155) | 120.7(6) |
| C(135)-C(137) | 1.529(8) | C(130)-C(129)-<br>N(16)  | 118.5(5) | C(156)-C(157)-<br>C(158) | 119.7(6) |
| C(138)-C(139) | 1.529(8) | C(129)-C(130)-<br>C(131) | 115.8(6) | C(157)-C(158)-<br>C(153) | 119.0(5) |
| C(138)-C(140) | 1.533(7) | C(129)-C(130)-<br>C(135) | 122.7(5) | C(157)-C(158)-<br>C(159) | 135.0(5) |
| C(141)-C(142) | 1.393(7) | C(131)-C(130)-<br>C(135) | 121.5(5) | C(153)-C(158)-<br>C(159) | 106.0(5) |
| C(141)-C(146) | 1.404(7) | C(132)-C(131)-<br>C(130) | 121.6(6) | C(160)-C(159)-<br>C(164) | 119.8(5) |
| C(142)-C(143) | 1.405(8) | C(131)-C(132)-<br>C(133) | 121.0(6) | C(160)-C(159)-<br>C(158) | 134.3(5) |
| C(142)-C(147) | 1.514(8) | C(132)-C(133)-<br>C(134) | 120.5(6) | C(164)-C(159)-<br>C(158) | 105.9(5) |
| C(143)-C(144) | 1.367(9) | C(133)-C(134)-<br>C(129) | 117.7(5) | C(161)-C(160)-<br>C(159) | 119.1(6) |
| C(144)-C(145) | 1.383(8) | C(133)-C(134)-<br>C(138) | 120.5(5) | C(160)-C(161)-<br>C(162) | 121.1(6) |
| C(145)-C(146) | 1.385(8) | C(129)-C(134)-<br>C(138) | 121.8(5) | C(163)-C(162)-<br>C(161) | 121.5(6) |
| C(146)-C(150) | 1.521(8) | C(130)-C(135)-<br>C(136) | 112.5(5) | C(162)-C(163)-<br>C(164) | 118.1(6) |
| C(147)-C(148) | 1.544(9) | C(130)-C(135)-<br>C(137) | 112.0(6) | N(20)-C(164)-<br>C(163)  | 128.8(5) |
| C(147)-C(149) | 1.544(8) | C(136)-C(135)-<br>C(137) | 109.1(5) | N(20)-C(164)-<br>C(159)  | 110.8(5) |
| C(150)-C(151) | 1.538(8) | C(139)-C(138)-<br>C(140) | 111.8(5) | C(163)-C(164)-<br>C(159) | 120.3(5) |
| C(150)-C(152) | 1.542(8) | C(139)-C(138)-<br>C(134) | 111.0(5) |                          |          |

**Table S6.** Crystallographic data for [Au(<sup>Dipp</sup>PZI)(DPA)]

|                                                     | [Au( <sup>Dipp</sup> PZI)(DPA)]                                 |
|-----------------------------------------------------|-----------------------------------------------------------------|
| Empirical formula                                   | C <sub>41</sub> H <sub>46</sub> AuN <sub>5</sub>                |
| Formula weight                                      | 805.79                                                          |
| Temperature (K)                                     | 223(2)                                                          |
| Wavelength (Å)                                      | 0.71073                                                         |
| Crystal system                                      | orthorhombic                                                    |
| Space group                                         | <i>Pbca</i>                                                     |
| Unit cell dimensions                                |                                                                 |
| <i>a</i> (Å)                                        | 19.901(17)                                                      |
| <i>b</i> (Å)                                        | 16.114(16)                                                      |
| <i>c</i> (Å)                                        | 24.04(3)                                                        |
| α (°)                                               | 90                                                              |
| β (°)                                               | 90                                                              |
| γ (°)                                               | 90                                                              |
| Volume (Å <sup>3</sup> )                            | 7709(13)                                                        |
| <i>Z</i>                                            | 8                                                               |
| Calculated density (g cm <sup>-3</sup> )            | 1.389                                                           |
| Absorption coefficient (mm <sup>-1</sup> )          | 3.850                                                           |
| F(000)                                              | 3248                                                            |
| Crystal size (mm <sup>3</sup> )                     | 0.132 × 0.116 × 0.020                                           |
| Theta range for data collection                     | 1.834 to 28.229°.                                               |
| Index ranges                                        | -22 ≤ <i>h</i> ≤ 26, -21 ≤ <i>k</i> ≤ 20, -31 ≤ <i>l</i> ≤ 31   |
| Reflections collected                               | 56503                                                           |
| Independent reflections [ <i>R</i> (int)]           | 9215 [0.1665]                                                   |
| Completeness to theta = 25.242°                     | 100.00%                                                         |
| Absorption correction                               | Semi-empirical from equivalents                                 |
| Max. and min. transmission                          | 0.7457 and 0.6039                                               |
| Refinement method                                   | Full-matrix least-squares on <i>F</i> <sup>2</sup>              |
| Data / restraints / parameters                      | 9215 / 12 / 432                                                 |
| Goodness-of-fit on <i>F</i> <sup>2</sup>            | 1.009                                                           |
| Final <i>R</i> indices [ <i>I</i> > 2σ( <i>I</i> )] | <i>R</i> <sub>1</sub> = 0.0554, <i>wR</i> <sub>2</sub> = 0.1202 |
| <i>R</i> indices (all data)                         | <i>R</i> <sub>1</sub> = 0.1633, <i>wR</i> <sub>2</sub> = 0.1757 |
| Extinction coefficient                              | n/a                                                             |
| Largest diff. peak and hole (e Å <sup>-3</sup> )    | 2.634 and -1.372                                                |

**Table S7.** Selected bond distances and bond angles of [Au(<sup>Di</sup>ppPZI)(DPA)]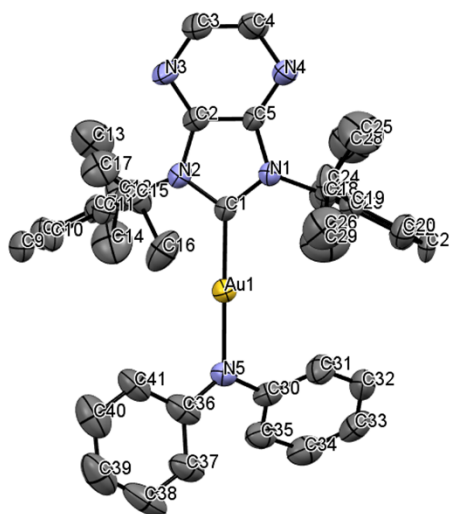

| bond distances (Å) |           |             |           | bond angles (°)   |           |                   |           |
|--------------------|-----------|-------------|-----------|-------------------|-----------|-------------------|-----------|
| Au(1)-C(1)         | 2.000(9)  | C(27)-C(29) | 1.521(14) | C(1)-Au(1)-N(5)   | 176.7(3)  | C(11)-C(15)-C(16) | 110.2(8)  |
| Au(1)-N(5)         | 2.063(7)  | C(27)-C(28) | 1.551(14) | C(1)-N(1)-C(5)    | 111.5(7)  | C(11)-C(15)-C(17) | 112.1(9)  |
| N(1)-C(1)          | 1.378(10) | C(30)-C(35) | 1.410(12) | C(1)-N(1)-C(18)   | 121.5(7)  | C(16)-C(15)-C(17) | 108.9(8)  |
| N(1)-C(5)          | 1.396(10) | C(30)-C(31) | 1.423(13) | C(5)-N(1)-C(18)   | 126.7(7)  | C(23)-C(18)-C(19) | 123.8(8)  |
| N(1)-C(18)         | 1.454(9)  | C(31)-C(32) | 1.362(13) | C(1)-N(2)-C(2)    | 109.7(7)  | C(23)-C(18)-N(1)  | 117.6(7)  |
| N(2)-C(1)          | 1.380(10) | C(32)-C(33) | 1.407(14) | C(1)-N(2)-C(6)    | 121.8(7)  | C(19)-C(18)-N(1)  | 118.4(8)  |
| N(2)-C(2)          | 1.423(10) | C(33)-C(34) | 1.368(14) | C(2)-N(2)-C(6)    | 128.5(7)  | C(20)-C(19)-C(18) | 117.9(9)  |
| N(2)-C(6)          | 1.452(10) | C(34)-C(35) | 1.395(13) | C(2)-N(3)-C(3)    | 112.4(8)  | C(20)-C(19)-C(24) | 119.7(9)  |
| N(3)-C(2)          | 1.348(10) | C(36)-C(41) | 1.409(14) | C(5)-N(4)-C(4)    | 111.6(8)  | C(18)-C(19)-C(24) | 122.2(8)  |
| N(3)-C(3)          | 1.362(11) | C(36)-C(37) | 1.418(14) | C(36)-N(5)-C(30)  | 121.6(8)  | C(21)-C(20)-C(19) | 119.0(10) |
| N(4)-C(5)          | 1.358(10) | C(37)-C(38) | 1.415(15) | C(36)-N(5)-Au(1)  | 122.5(7)  | C(20)-C(21)-C(22) | 123.8(9)  |
| N(4)-C(4)          | 1.367(11) | C(38)-C(39) | 1.368(17) | C(30)-N(5)-Au(1)  | 115.9(6)  | C(21)-C(22)-C(23) | 118.7(8)  |
| N(5)-C(36)         | 1.412(12) | C(39)-C(40) | 1.416(17) | N(1)-C(1)-N(2)    | 105.8(7)  | C(18)-C(23)-C(22) | 116.7(8)  |
| N(5)-C(30)         | 1.421(12) | C(40)-C(41) | 1.397(14) | N(1)-C(1)-Au(1)   | 128.1(6)  | C(18)-C(23)-C(27) | 122.8(8)  |
| C(2)-C(5)          | 1.401(11) |             |           | N(2)-C(1)-Au(1)   | 125.7(6)  | C(22)-C(23)-C(27) | 120.5(8)  |
| C(3)-C(4)          | 1.375(13) |             |           | N(3)-C(2)-C(5)    | 123.1(8)  | C(19)-C(24)-C(25) | 110.6(9)  |
| C(6)-C(7)          | 1.425(12) |             |           | N(3)-C(2)-N(2)    | 130.1(8)  | C(19)-C(24)-C(26) | 114.0(9)  |
| C(6)-C(11)         | 1.427(12) |             |           | C(5)-C(2)-N(2)    | 106.8(7)  | C(25)-C(24)-C(26) | 109.8(10) |
| C(7)-C(8)          | 1.399(12) |             |           | N(3)-C(3)-C(4)    | 124.5(9)  | C(29)-C(27)-C(23) | 112.8(9)  |
| C(7)-C(12)         | 1.555(13) |             |           | N(4)-C(4)-C(3)    | 123.8(9)  | C(29)-C(27)-C(28) | 108.1(10) |
| C(8)-C(9)          | 1.390(14) |             |           | N(4)-C(5)-N(1)    | 129.2(7)  | C(23)-C(27)-C(28) | 111.2(8)  |
| C(9)-C(10)         | 1.399(13) |             |           | N(4)-C(5)-C(2)    | 124.5(8)  | C(35)-C(30)-N(5)  | 123.2(9)  |
| C(10)-C(11)        | 1.415(12) |             |           | N(1)-C(5)-C(2)    | 106.2(7)  | C(35)-C(30)-C(31) | 118.2(9)  |
| C(11)-C(15)        | 1.538(13) |             |           | C(7)-C(6)-C(11)   | 123.8(8)  | N(5)-C(30)-C(31)  | 118.6(8)  |
| C(12)-C(13)        | 1.550(15) |             |           | C(7)-C(6)-N(2)    | 118.8(8)  | C(32)-C(31)-C(30) | 119.7(10) |
| C(12)-C(14)        | 1.565(14) |             |           | C(11)-C(6)-N(2)   | 117.4(8)  | C(31)-C(32)-C(33) | 121.9(10) |
| C(15)-C(16)        | 1.569(13) |             |           | C(8)-C(7)-C(6)    | 116.8(9)  | C(34)-C(33)-C(32) | 118.8(11) |
| C(15)-C(17)        | 1.582(13) |             |           | C(8)-C(7)-C(12)   | 122.0(9)  | C(33)-C(34)-C(35) | 121.0(11) |
| C(18)-C(23)        | 1.399(11) |             |           | C(6)-C(7)-C(12)   | 121.2(8)  | C(34)-C(35)-C(30) | 120.3(10) |
| C(18)-C(19)        | 1.427(12) |             |           | C(9)-C(8)-C(7)    | 121.2(10) | C(41)-C(36)-N(5)  | 117.2(9)  |
| C(19)-C(20)        | 1.404(12) |             |           | C(8)-C(9)-C(10)   | 121.2(10) | C(41)-C(36)-C(37) | 116.2(10) |
| C(19)-C(24)        | 1.511(13) |             |           | C(9)-C(10)-C(11)  | 121.2(9)  | N(5)-C(36)-C(37)  | 126.6(10) |
| C(20)-C(21)        | 1.372(13) |             |           | C(10)-C(11)-C(6)  | 115.8(9)  | C(38)-C(37)-C(36) | 122.4(12) |
| C(21)-C(22)        | 1.410(12) |             |           | C(10)-C(11)-C(15) | 122.4(9)  | C(39)-C(38)-C(37) | 119.9(14) |

|                       |                                |                             |
|-----------------------|--------------------------------|-----------------------------|
| C(22)-C(23) 1.431(11) | C(6)-C(11)-C(15) 121.8(8)      | C(38)-C(39)-C(40) 119.2(13) |
| C(23)-C(27) 1.538(12) | C(13)-C(12)-C(7) 111.9(8)      | C(41)-C(40)-C(39) 120.9(13) |
| C(24)-C(25) 1.540(15) | C(13)-C(12)-<br>C(14) 110.5(9) | C(40)-C(41)-C(36) 121.3(12) |
| C(24)-C(26) 1.575(14) | C(7)-C(12)-C(14) 110.2(9)      |                             |

---



**Table S8.** Crystallographic data for [Au<sup>(DippPZI)</sup>](DPAC)]

|                                                     | [Au <sup>(DippPZI)</sup> ](DPAC)]                               |
|-----------------------------------------------------|-----------------------------------------------------------------|
| Empirical formula                                   | C <sub>54</sub> H <sub>54</sub> AuN <sub>5</sub>                |
| Formula weight                                      | 969.99                                                          |
| Temperature (K)                                     | 223(2)                                                          |
| Wavelength (Å)                                      | 0.71073                                                         |
| Crystal system                                      | monoclinic                                                      |
| Space group                                         | <i>P</i> 2 <sub>1</sub> / <i>c</i>                              |
| Unit cell dimensions                                |                                                                 |
| <i>a</i> (Å)                                        | 14.645(3)                                                       |
| <i>b</i> (Å)                                        | 14.248(3)                                                       |
| <i>c</i> (Å)                                        | 21.785(5)                                                       |
| α (°)                                               | 90                                                              |
| β (°)                                               | 98.474(7)                                                       |
| γ (°)                                               | 90                                                              |
| Volume (Å <sup>3</sup> )                            | 4496.2(16)                                                      |
| Z                                                   | 4                                                               |
| Calculated density (g cm <sup>-3</sup> )            | 1.433                                                           |
| Absorption coefficient (mm <sup>-1</sup> )          | 3.314                                                           |
| F(000)                                              | 1968                                                            |
| Crystal size (mm <sup>3</sup> )                     | 0.100 × 0.067 × 0.047                                           |
| Theta range for data collection                     | 1.890 to 28.404°.                                               |
| Index ranges                                        | -17 ≤ <i>h</i> ≤ 19, -18 ≤ <i>k</i> ≤ 18, -28 ≤ <i>l</i> ≤ 28   |
| Reflections collected                               | 69346                                                           |
| Independent reflections [ <i>R</i> (int)]           | 11156 [0.1722]                                                  |
| Completeness to theta = 25.242°                     | 100.00%                                                         |
| Absorption correction                               | Semi-empirical from equivalents                                 |
| Max. and min. transmission                          | 0.7457 and 0.6369                                               |
| Refinement method                                   | Full-matrix least-squares on <i>F</i> <sup>2</sup>              |
| Data / restraints / parameters                      | 11156 / 0 / 549                                                 |
| Goodness-of-fit on <i>F</i> <sup>2</sup>            | 0.998                                                           |
| Final <i>R</i> indices [ <i>I</i> > 2σ( <i>I</i> )] | <i>R</i> <sub>1</sub> = 0.0512, <i>wR</i> <sub>2</sub> = 0.0882 |
| <i>R</i> indices (all data)                         | <i>R</i> <sub>1</sub> = 0.1305, <i>wR</i> <sub>2</sub> = 0.1150 |
| Extinction coefficient                              | n/a                                                             |
| Largest diff. peak and hole (e Å <sup>-3</sup> )    | 1.649 and -0.810                                                |

**Table S9.** Selected bond distances and bond angles of [Au(Di<sup>pp</sup>PZI)(DPAC)]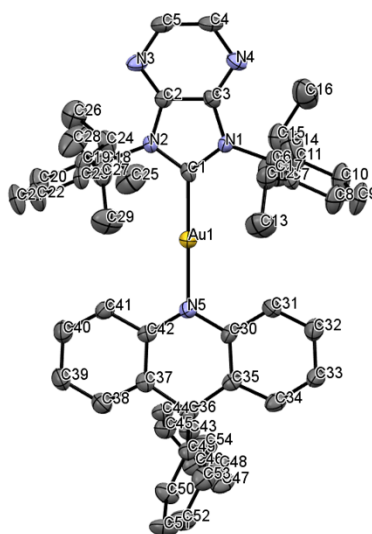

| bond distances (Å) |           |             |          | bond angles (°)  |          |                   |          |
|--------------------|-----------|-------------|----------|------------------|----------|-------------------|----------|
| Au(1)-C(1)         | 1.956(6)  | C(37)-C(42) | 1.413(8) | C(1)-Au(1)-N(5)  | 176.6(2) | C(22)-C(23)-C(27) | 120.1(6) |
| Au(1)-N(5)         | 2.036(5)  | C(38)-C(39) | 1.380(8) | C(1)-N(1)-C(3)   | 110.3(5) | C(18)-C(23)-C(27) | 122.9(6) |
| N(1)-C(1)          | 1.375(7)  | C(39)-C(40) | 1.382(8) | C(1)-N(1)-C(6)   | 122.8(5) | C(25)-C(24)-C(26) | 110.2(6) |
| N(1)-C(3)          | 1.387(7)  | C(40)-C(41) | 1.374(9) | C(3)-N(1)-C(6)   | 126.9(5) | C(25)-C(24)-C(19) | 112.5(6) |
| N(1)-C(6)          | 1.445(7)  | C(41)-C(42) | 1.409(8) | C(1)-N(2)-C(2)   | 110.7(5) | C(26)-C(24)-C(19) | 112.9(6) |
| N(2)-C(1)          | 1.375(7)  | C(43)-C(48) | 1.395(8) | C(1)-N(2)-C(18)  | 122.1(5) | C(28)-C(27)-C(29) | 111.6(6) |
| N(2)-C(2)          | 1.386(7)  | C(43)-C(44) | 1.396(8) | C(2)-N(2)-C(18)  | 127.2(5) | C(28)-C(27)-C(23) | 109.9(6) |
| N(2)-C(18)         | 1.462(7)  | C(44)-C(45) | 1.379(8) | C(2)-N(3)-C(5)   | 111.7(6) | C(29)-C(27)-C(23) | 111.7(6) |
| N(3)-C(2)          | 1.318(7)  | C(45)-C(46) | 1.382(8) | C(3)-N(4)-C(4)   | 112.7(6) | N(5)-C(30)-C(35)  | 123.4(6) |
| N(3)-C(5)          | 1.357(7)  | C(46)-C(47) | 1.372(9) | C(30)-N(5)-C(42) | 118.6(5) | N(5)-C(30)-C(31)  | 118.6(6) |
| N(4)-C(3)          | 1.324(7)  | C(47)-C(48) | 1.377(8) | C(30)-N(5)-Au(1) | 120.5(4) | C(35)-C(30)-C(31) | 118.0(6) |
| N(4)-C(4)          | 1.347(7)  | C(49)-C(54) | 1.381(8) | C(42)-N(5)-Au(1) | 120.4(4) | C(32)-C(31)-C(30) | 122.3(6) |
| N(5)-C(30)         | 1.390(7)  | C(49)-C(50) | 1.387(8) | N(2)-C(1)-N(1)   | 106.0(5) | C(31)-C(32)-C(33) | 119.2(7) |
| N(5)-C(42)         | 1.393(7)  | C(50)-C(51) | 1.394(8) | N(2)-C(1)-Au(1)  | 126.7(4) | C(34)-C(33)-C(32) | 119.1(6) |
| C(2)-C(3)          | 1.405(8)  | C(51)-C(52) | 1.381(9) | N(1)-C(1)-Au(1)  | 126.9(4) | C(33)-C(34)-C(35) | 123.6(6) |
| C(4)-C(5)          | 1.400(9)  | C(52)-C(53) | 1.391(9) | N(3)-C(2)-N(2)   | 128.4(6) | C(30)-C(35)-C(34) | 117.9(6) |
| C(6)-C(7)          | 1.388(8)  | C(53)-C(54) | 1.394(9) | N(3)-C(2)-C(3)   | 125.3(6) | C(30)-C(35)-C(36) | 121.2(5) |
| C(6)-C(11)         | 1.399(8)  |             |          | N(2)-C(2)-C(3)   | 106.3(5) | C(34)-C(35)-C(36) | 120.7(5) |
| C(7)-C(8)          | 1.404(8)  |             |          | N(4)-C(3)-N(1)   | 129.9(6) | C(35)-C(36)-C(43) | 107.6(5) |
| C(7)-C(12)         | 1.533(9)  |             |          | N(4)-C(3)-C(2)   | 123.2(6) | C(35)-C(36)-C(37) | 109.9(5) |
| C(8)-C(9)          | 1.365(10) |             |          | N(1)-C(3)-C(2)   | 106.8(5) | C(43)-C(36)-C(37) | 109.9(5) |
| C(9)-C(10)         | 1.365(10) |             |          | N(4)-C(4)-C(5)   | 123.6(6) | C(35)-C(36)-C(49) | 111.0(5) |

|                 |          |                   |          |                   |          |
|-----------------|----------|-------------------|----------|-------------------|----------|
| C(10)-<br>C(11) | 1.409(9) | N(3)-C(5)-C(4)    | 123.4(6) | C(43)-C(36)-C(49) | 110.9(5) |
| C(11)-<br>C(15) | 1.514(8) | C(7)-C(6)-C(11)   | 123.4(6) | C(37)-C(36)-C(49) | 107.5(5) |
| C(12)-<br>C(14) | 1.514(9) | C(7)-C(6)-N(1)    | 118.0(6) | C(38)-C(37)-C(42) | 118.2(6) |
| C(12)-<br>C(13) | 1.534(9) | C(11)-C(6)-N(1)   | 118.6(5) | C(38)-C(37)-C(36) | 120.5(6) |
| C(15)-<br>C(17) | 1.504(9) | C(6)-C(7)-C(8)    | 117.2(6) | C(42)-C(37)-C(36) | 121.2(6) |
| C(15)-<br>C(16) | 1.546(9) | C(6)-C(7)-C(12)   | 123.5(6) | C(39)-C(38)-C(37) | 124.0(6) |
| C(18)-<br>C(19) | 1.392(8) | C(8)-C(7)-C(12)   | 119.2(6) | C(38)-C(39)-C(40) | 117.6(7) |
| C(18)-<br>C(23) | 1.406(8) | C(9)-C(8)-C(7)    | 120.3(6) | C(41)-C(40)-C(39) | 120.1(7) |
| C(19)-<br>C(20) | 1.394(8) | C(8)-C(9)-C(10)   | 122.0(7) | C(40)-C(41)-C(42) | 123.3(6) |
| C(19)-<br>C(24) | 1.534(8) | C(9)-C(10)-C(11)  | 120.5(7) | N(5)-C(42)-C(41)  | 120.4(5) |
| C(20)-<br>C(21) | 1.374(9) | C(6)-C(11)-C(10)  | 116.6(6) | N(5)-C(42)-C(37)  | 122.8(5) |
| C(21)-<br>C(22) | 1.386(9) | C(6)-C(11)-C(15)  | 123.9(6) | C(41)-C(42)-C(37) | 116.8(6) |
| C(22)-<br>C(23) | 1.393(8) | C(10)-C(11)-C(15) | 119.5(6) | C(48)-C(43)-C(44) | 116.4(5) |
| C(23)-<br>C(27) | 1.534(8) | C(14)-C(12)-C(7)  | 109.1(6) | C(48)-C(43)-C(36) | 121.6(5) |
| C(24)-<br>C(25) | 1.519(8) | C(14)-C(12)-C(13) | 111.9(6) | C(44)-C(43)-C(36) | 121.9(5) |
| C(24)-<br>C(26) | 1.523(8) | C(7)-C(12)-C(13)  | 113.5(6) | C(45)-C(44)-C(43) | 121.4(6) |
| C(27)-<br>C(28) | 1.526(9) | C(17)-C(15)-C(11) | 112.6(6) | C(44)-C(45)-C(46) | 120.7(6) |
| C(27)-<br>C(29) | 1.527(9) | C(17)-C(15)-C(16) | 110.7(7) | C(47)-C(46)-C(45) | 119.0(6) |
| C(30)-<br>C(35) | 1.404(8) | C(11)-C(15)-C(16) | 111.1(6) | C(46)-C(47)-C(48) | 120.2(6) |
| C(30)-<br>C(31) | 1.432(8) | C(19)-C(18)-C(23) | 123.2(6) | C(47)-C(48)-C(43) | 122.3(6) |
| C(31)-<br>C(32) | 1.378(8) | C(19)-C(18)-N(2)  | 118.2(6) | C(54)-C(49)-C(50) | 117.0(6) |
| C(32)-<br>C(33) | 1.396(8) | C(23)-C(18)-N(2)  | 118.6(5) | C(54)-C(49)-C(36) | 120.0(6) |
| C(33)-<br>C(34) | 1.371(8) | C(18)-C(19)-C(20) | 116.9(6) | C(50)-C(49)-C(36) | 122.9(5) |
| C(34)-<br>C(35) | 1.406(8) | C(18)-C(19)-C(24) | 122.7(6) | C(49)-C(50)-C(51) | 122.6(6) |
| C(35)-<br>C(36) | 1.534(8) | C(20)-C(19)-C(24) | 120.4(6) | C(52)-C(51)-C(50) | 119.3(7) |
| C(36)-<br>C(43) | 1.541(8) | C(21)-C(20)-C(19) | 121.7(7) | C(51)-C(52)-C(53) | 119.2(6) |
| C(36)-<br>C(37) | 1.546(8) | C(20)-C(21)-C(22) | 120.2(7) | C(52)-C(53)-C(54) | 120.3(6) |
| C(36)-<br>C(49) | 1.551(8) | C(21)-C(22)-C(23) | 120.9(7) | C(49)-C(54)-C(53) | 121.5(6) |
| C(37)-<br>C(38) | 1.401(8) | C(22)-C(23)-C(18) | 117.1(6) |                   |          |

**Table S10.** Crystallographic data for [Au<sup>(DippPZI)</sup>(DMAC)]

|                                                     | [Au <sup>(DippPZI)</sup> (DMAC)]                                |
|-----------------------------------------------------|-----------------------------------------------------------------|
| Empirical formula                                   | C <sub>44</sub> H <sub>50</sub> AuN <sub>5</sub>                |
| Formula weight                                      | 845.85                                                          |
| Temperature (K)                                     | 223(2)                                                          |
| Wavelength (Å)                                      | 0.71073                                                         |
| Crystal system                                      | orthorhombic                                                    |
| Space group                                         | <i>P</i> 2 <sub>1</sub> 2 <sub>1</sub> 2 <sub>1</sub>           |
| Unit cell dimensions                                |                                                                 |
| <i>a</i> (Å)                                        | 16.035(9)                                                       |
| <i>b</i> (Å)                                        | 20.631(10)                                                      |
| <i>c</i> (Å)                                        | 23.907(11)                                                      |
| α (°)                                               | 90                                                              |
| β (°)                                               | 90                                                              |
| γ (°)                                               | 90                                                              |
| Volume (Å <sup>3</sup> )                            | 7909(7)                                                         |
| Z                                                   | 8                                                               |
| Calculated density (g cm <sup>-3</sup> )            | 1.421                                                           |
| Absorption coefficient (mm <sup>-1</sup> )          | 3.756                                                           |
| F(000)                                              | 3424                                                            |
| Crystal size (mm <sup>3</sup> )                     | 0.119 × 0.086 × 0.080                                           |
| Theta range for data collection                     | 1.820 to 29.275°.                                               |
| Index ranges                                        | -21 ≤ <i>h</i> ≤ 21, -27 ≤ <i>k</i> ≤ 27, -30 ≤ <i>l</i> ≤ 32   |
| Reflections collected                               | 145224                                                          |
| Independent reflections [ <i>R</i> (int)]           | 20215 [0.1405]                                                  |
| Completeness to theta = 25.242°                     | 99.90%                                                          |
| Absorption correction                               | Semi-empirical from equivalents                                 |
| Max. and min. transmission                          | 0.7457 and 0.6783                                               |
| Refinement method                                   | Full-matrix least-squares on <i>F</i> <sup>2</sup>              |
| Data / restraints / parameters                      | 20215 / 0 / 920                                                 |
| Goodness-of-fit on <i>F</i> <sup>2</sup>            | 1.005                                                           |
| Final <i>R</i> indices [ <i>I</i> > 2σ( <i>I</i> )] | <i>R</i> <sub>1</sub> = 0.0449, <i>wR</i> <sub>2</sub> = 0.0752 |
| <i>R</i> indices (all data)                         | <i>R</i> <sub>1</sub> = 0.1221, <i>wR</i> <sub>2</sub> = 0.0984 |
| Extinction coefficient                              | n/a                                                             |
| Largest diff. peak and hole (e Å <sup>-3</sup> )    | 1.508 and -1.656                                                |

**Table S11.** Selected bond distances and bond angles of [Au(DiPPZl)(DMAC)]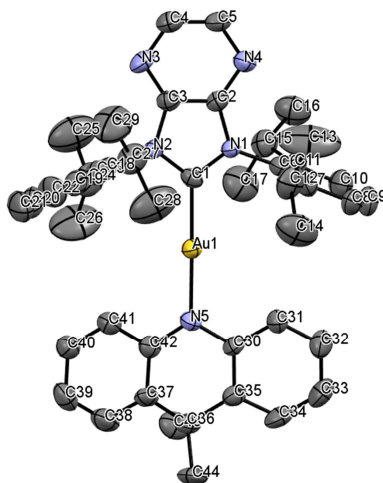

| bond distances (Å) |           |             |           | bond angles (°)  |           |                   |           |
|--------------------|-----------|-------------|-----------|------------------|-----------|-------------------|-----------|
| Au(1)-C(1)         | 1.968(10) | C(31)-C(32) | 1.388(13) | C(1)-Au(1)-N(5)  | 178.7(4)  | C(23)-C(18)-N(2)  | 115.3(10) |
| Au(1)-N(5)         | 2.027(8)  | C(32)-C(33) | 1.387(16) | C(1)-N(1)-C(2)   | 110.5(8)  | C(20)-C(19)-C(18) | 115.1(12) |
| N(1)-C(1)          | 1.363(11) | C(33)-C(34) | 1.346(17) | C(1)-N(1)-C(6)   | 123.6(8)  | C(20)-C(19)-C(24) | 122.8(13) |
| N(1)-C(2)          | 1.384(12) | C(34)-C(35) | 1.389(14) | C(2)-N(1)-C(6)   | 125.9(9)  | C(18)-C(19)-C(24) | 122.0(11) |
| N(1)-C(6)          | 1.472(11) | C(35)-C(36) | 1.528(16) | C(1)-N(2)-C(3)   | 110.5(8)  | C(21)-C(20)-C(19) | 122.9(15) |
| N(2)-C(1)          | 1.359(11) | C(36)-C(37) | 1.527(15) | C(1)-N(2)-C(18)  | 121.8(8)  | C(20)-C(21)-C(22) | 119.6(14) |
| N(2)-C(3)          | 1.396(13) | C(36)-C(43) | 1.535(15) | C(3)-N(2)-C(18)  | 127.6(8)  | C(21)-C(22)-C(23) | 122.1(14) |
| N(2)-C(18)         | 1.455(12) | C(36)-C(44) | 1.550(14) | C(3)-N(3)-C(4)   | 110.8(10) | C(22)-C(23)-C(18) | 115.2(13) |
| N(3)-C(3)          | 1.332(13) | C(37)-C(38) | 1.375(14) | C(2)-N(4)-C(5)   | 111.0(10) | C(22)-C(23)-C(27) | 120.3(12) |
| N(3)-C(4)          | 1.341(14) | C(37)-C(42) | 1.415(13) | C(42)-N(5)-C(30) | 117.8(8)  | C(18)-C(23)-C(27) | 124.4(11) |
| N(4)-C(2)          | 1.333(13) | C(38)-C(39) | 1.386(16) | C(42)-N(5)-Au(1) | 121.3(6)  | C(25)-C(24)-C(26) | 114.7(14) |
| N(4)-C(5)          | 1.347(13) | C(39)-C(40) | 1.388(17) | C(30)-N(5)-Au(1) | 120.2(7)  | C(25)-C(24)-C(19) | 110.1(12) |
| N(5)-C(42)         | 1.384(12) | C(40)-C(41) | 1.375(15) | N(2)-C(1)-N(1)   | 106.4(8)  | C(26)-C(24)-C(19) | 114.1(14) |
| N(5)-C(30)         | 1.401(12) | C(41)-C(42) | 1.417(14) | N(2)-C(1)-Au(1)  | 127.6(7)  | C(23)-C(27)-C(29) | 114.7(11) |
| C(2)-C(3)          | 1.401(14) |             |           | N(1)-C(1)-Au(1)  | 126.0(7)  | C(23)-C(27)-C(28) | 109.5(13) |
| C(4)-C(5)          | 1.365(15) |             |           | N(4)-C(2)-N(1)   | 129.4(9)  | C(29)-C(27)-C(28) | 112.3(12) |
| C(6)-C(11)         | 1.392(14) |             |           | N(4)-C(2)-C(3)   | 123.9(10) | C(31)-C(30)-N(5)  | 119.0(9)  |
| C(6)-C(7)          | 1.401(14) |             |           | N(1)-C(2)-C(3)   | 106.6(10) | C(31)-C(30)-C(35) | 119.1(9)  |
| C(7)-C(8)          | 1.393(13) |             |           | N(3)-C(3)-N(2)   | 129.5(10) | N(5)-C(30)-C(35)  | 121.9(10) |

|             |           |                   |           |                   |           |
|-------------|-----------|-------------------|-----------|-------------------|-----------|
| C(7)-C(12)  | 1.486(15) | N(3)-C(3)-C(2)    | 124.5(11) | C(32)-C(31)-C(30) | 121.7(11) |
| C(8)-C(9)   | 1.381(15) | N(2)-C(3)-C(2)    | 105.9(9)  | C(33)-C(32)-C(31) | 118.9(12) |
| C(9)-C(10)  | 1.341(16) | N(3)-C(4)-C(5)    | 125.0(11) | C(34)-C(33)-C(32) | 119.1(11) |
| C(10)-C(11) | 1.400(14) | N(4)-C(5)-C(4)    | 124.7(12) | C(33)-C(34)-C(35) | 124.4(13) |
| C(11)-C(15) | 1.508(15) | C(11)-C(6)-C(7)   | 124.9(9)  | C(34)-C(35)-C(30) | 116.7(11) |
| C(12)-C(13) | 1.469(19) | C(11)-C(6)-N(1)   | 117.7(9)  | C(34)-C(35)-C(36) | 122.3(11) |
| C(12)-C(14) | 1.525(16) | C(7)-C(6)-N(1)    | 117.4(9)  | C(30)-C(35)-C(36) | 120.9(9)  |
| C(15)-C(16) | 1.518(15) | C(8)-C(7)-C(6)    | 115.4(10) | C(37)-C(36)-C(35) | 109.6(9)  |
| C(15)-C(17) | 1.527(18) | C(8)-C(7)-C(12)   | 121.5(10) | C(37)-C(36)-C(43) | 107.4(9)  |
| C(18)-C(19) | 1.393(15) | C(6)-C(7)-C(12)   | 123.0(9)  | C(35)-C(36)-C(43) | 109.0(9)  |
| C(18)-C(23) | 1.401(14) | C(9)-C(8)-C(7)    | 120.7(11) | C(37)-C(36)-C(44) | 111.2(9)  |
| C(19)-C(20) | 1.389(17) | C(10)-C(9)-C(8)   | 122.1(11) | C(35)-C(36)-C(44) | 111.1(10) |
| C(19)-C(24) | 1.501(17) | C(9)-C(10)-C(11)  | 121.1(12) | C(43)-C(36)-C(44) | 108.6(10) |
| C(20)-C(21) | 1.367(19) | C(6)-C(11)-C(10)  | 115.8(11) | C(38)-C(37)-C(42) | 117.5(10) |
| C(21)-C(22) | 1.369(19) | C(6)-C(11)-C(15)  | 122.7(9)  | C(38)-C(37)-C(36) | 122.5(10) |
| C(21)-H(21) | 0.94      | C(10)-C(11)-C(15) | 121.5(11) | C(42)-C(37)-C(36) | 119.9(10) |
| C(22)-C(23) | 1.399(15) | C(13)-C(12)-C(7)  | 114.1(12) | C(37)-C(38)-C(39) | 124.5(12) |
| C(23)-C(27) | 1.493(17) | C(13)-C(12)-C(14) | 112.4(12) | C(38)-C(39)-C(40) | 117.7(12) |
| C(24)-C(25) | 1.458(18) | C(7)-C(12)-C(14)  | 113.0(12) | C(41)-C(40)-C(39) | 120.2(12) |
| C(24)-C(26) | 1.496(19) | C(11)-C(15)-C(16) | 113.5(10) | C(40)-C(41)-C(42) | 121.5(11) |
| C(27)-C(29) | 1.512(17) | C(11)-C(15)-C(17) | 109.9(11) | N(5)-C(42)-C(37)  | 123.1(9)  |
| C(27)-C(28) | 1.539(17) | C(16)-C(15)-C(17) | 110.2(11) | N(5)-C(42)-C(41)  | 118.4(10) |
| C(30)-C(31) | 1.391(14) | C(19)-C(18)-C(23) | 125.0(11) | C(37)-C(42)-C(41) | 118.5(10) |
| C(30)-C(35) | 1.413(15) | C(19)-C(18)-N(2)  | 119.6(10) |                   |           |

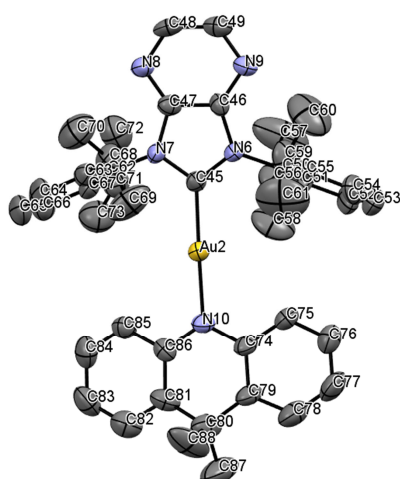

| bond distances (Å) |           |             |           | bond angles (°)   |           |                   |           |
|--------------------|-----------|-------------|-----------|-------------------|-----------|-------------------|-----------|
| Au(2)-C(45)        | 1.972(10) | C(76)-C(77) | 1.354(17) | C(45)-Au(2)-N(10) | 178.6(4)  | C(67)-C(62)-N(7)  | 117.7(10) |
| Au(2)-N(10)        | 2.035(8)  | C(77)-C(78) | 1.366(18) | C(45)-N(6)-C(46)  | 110.1(8)  | C(62)-C(63)-C(64) | 117.9(12) |
| N(6)-C(45)         | 1.355(12) | C(78)-C(79) | 1.416(16) | C(45)-N(6)-C(50)  | 123.3(9)  | C(62)-C(63)-C(68) | 120.5(11) |
| N(6)-C(46)         | 1.396(13) | C(79)-C(80) | 1.493(18) | C(46)-N(6)-C(50)  | 126.6(9)  | C(64)-C(63)-C(68) | 121.5(12) |
| N(6)-C(50)         | 1.455(12) | C(80)-C(81) | 1.529(17) | C(45)-N(7)-C(47)  | 109.9(9)  | C(65)-C(64)-C(63) | 120.0(13) |
| N(7)-C(45)         | 1.377(11) | C(80)-C(87) | 1.541(17) | C(45)-N(7)-C(62)  | 122.9(9)  | C(64)-C(65)-C(66) | 122.6(13) |
| N(7)-C(47)         | 1.395(14) | C(80)-C(88) | 1.568(18) | C(47)-N(7)-C(62)  | 127.0(8)  | C(65)-C(66)-C(67) | 120.0(13) |
| N(7)-C(62)         | 1.451(13) | C(81)-C(82) | 1.376(15) | C(47)-N(7)-C(48)  | 111.7(10) | C(66)-C(67)-C(62) | 115.9(12) |
| N(8)-C(47)         | 1.318(13) | C(81)-C(86) | 1.412(14) | C(46)-N(9)-C(49)  | 110.9(10) | C(66)-C(67)-C(71) | 122.6(11) |
| N(8)-C(48)         | 1.343(15) | C(82)-C(83) | 1.388(17) | C(86)-N(10)-C(74) | 118.9(9)  | C(62)-C(67)-C(71) | 121.5(10) |
| N(9)-C(46)         | 1.318(14) | C(83)-C(84) | 1.384(18) | C(86)-N(10)-Au(2) | 120.2(6)  | C(63)-C(68)-C(69) | 109.6(12) |
| N(9)-C(49)         | 1.353(14) | C(84)-C(85) | 1.356(16) | C(74)-N(10)-Au(2) | 120.8(7)  | C(63)-C(68)-C(70) | 113.1(10) |
| N(10)-C(86)        | 1.388(12) | C(85)-C(86) | 1.421(14) | N(6)-C(45)-N(7)   | 107.0(9)  | C(69)-C(68)-C(70) | 109.5(11) |
| N(10)-C(74)        | 1.393(12) |             |           | N(6)-C(45)-Au(2)  | 125.4(7)  | C(73)-C(71)-C(67) | 112.2(11) |
| C(46)-C(47)        | 1.403(14) |             |           | N(7)-C(45)-Au(2)  | 127.6(8)  | C(73)-C(71)-C(72) | 108.8(11) |
| C(48)-C(49)        | 1.382(17) |             |           | N(9)-C(46)-N(6)   | 128.5(10) | C(67)-C(71)-C(72) | 112.5(11) |
| C(50)-C(55)        | 1.375(15) |             |           | N(9)-C(46)-C(47)  | 124.6(11) | N(10)-C(74)-C(75) | 118.7(10) |
| C(50)-C(51)        | 1.394(15) |             |           | N(6)-C(46)-C(47)  | 106.9(10) | N(10)-C(74)-C(79) | 122.3(11) |
| C(51)-C(52)        | 1.397(14) |             |           | N(8)-C(47)-N(7)   | 129.3(11) | C(75)-C(74)-C(79) | 119.0(10) |

|                       |                                 |                             |
|-----------------------|---------------------------------|-----------------------------|
| C(51)-C(56) 1.484(16) | N(8)-C(47)-<br>C(46) 124.2(12)  | C(76)-C(75)-C(74) 121.0(11) |
| C(52)-C(53) 1.385(17) | N(7)-C(47)-<br>C(46) 106.1(10)  | C(77)-C(76)-C(75) 120.8(13) |
| C(53)-C(54) 1.348(18) | N(8)-C(48)-<br>C(49) 123.8(11)  | C(76)-C(77)-C(78) 118.8(12) |
| C(54)-C(55) 1.418(17) | N(9)-C(49)-<br>C(48) 124.5(12)  | C(77)-C(78)-C(79) 123.5(13) |
| C(55)-C(59) 1.498(17) | C(55)-C(50)-<br>C(51) 124.9(10) | C(74)-C(79)-C(78) 116.8(12) |
| C(56)-C(57) 1.429(17) | C(55)-C(50)-<br>N(6) 118.2(10)  | C(74)-C(79)-C(80) 121.5(11) |
| C(56)-C(58) 1.526(15) | C(51)-C(50)-<br>N(6) 116.8(9)   | C(78)-C(79)-C(80) 121.5(12) |
| C(59)-C(60) 1.493(18) | C(50)-C(51)-<br>C(52) 116.5(11) | C(79)-C(80)-C(81) 111.9(11) |
| C(59)-C(61) 1.50(2)   | C(50)-C(51)-<br>C(56) 122.4(10) | C(79)-C(80)-C(87) 109.9(12) |
| C(62)-C(63) 1.384(15) | C(52)-C(51)-<br>C(56) 121.1(11) | C(81)-C(80)-C(87) 110.0(10) |
| C(62)-C(67) 1.412(14) | C(53)-C(52)-<br>C(51) 120.3(12) | C(79)-C(80)-C(88) 109.7(11) |
| C(63)-C(64) 1.391(16) | C(54)-C(53)-<br>C(52) 121.0(12) | C(81)-C(80)-C(88) 106.3(12) |
| C(63)-C(68) 1.510(16) | C(53)-C(54)-<br>C(55) 121.8(13) | C(87)-C(80)-C(88) 109.0(13) |
| C(64)-C(65) 1.353(17) | C(50)-C(55)-<br>C(54) 115.4(13) | C(82)-C(81)-C(86) 118.8(12) |
| C(65)-C(66) 1.385(18) | C(50)-C(55)-<br>C(59) 123.8(11) | C(82)-C(81)-C(80) 121.4(12) |
| C(66)-C(67) 1.406(15) | C(54)-C(55)-<br>C(59) 120.8(12) | C(86)-C(81)-C(80) 119.7(11) |
| C(67)-C(71) 1.527(16) | C(57)-C(56)-<br>C(51) 117.0(12) | C(81)-C(82)-C(83) 122.5(13) |
| C(68)-C(69) 1.531(17) | C(57)-C(56)-<br>C(58) 114.8(13) | C(84)-C(83)-C(82) 118.9(13) |
| C(68)-C(70) 1.531(15) | C(51)-C(56)-<br>C(58) 114.3(12) | C(85)-C(84)-C(83) 120.1(13) |
| C(71)-C(73) 1.513(15) | C(60)-C(59)-<br>C(61) 112.0(13) | C(84)-C(85)-C(86) 122.0(12) |
| C(71)-C(72) 1.530(17) | C(60)-C(59)-<br>C(55) 113.0(13) | N(10)-C(86)-C(81) 122.9(10) |
| C(74)-C(75) 1.402(15) | C(61)-C(59)-<br>C(55) 111.9(13) | N(10)-C(86)-C(85) 119.4(10) |
| C(74)-C(79) 1.406(15) | C(63)-C(62)-<br>C(67) 123.7(11) | C(81)-C(86)-C(85) 117.6(10) |
| C(75)-C(76) 1.392(14) | C(63)-C(62)-<br>N(7) 118.6(10)  |                             |



**Table S12.** Photophysical data for Au(I) complexes<sup>a</sup>

|                                  | $\lambda_{\text{abs}}$ (nm) <sup>b</sup> | $\lambda_{\text{em}}$ (nm) <sup>c</sup> | $\tau$ ( $\mu\text{s}$ ) <sup>d</sup> | $\Phi$ <sup>e</sup> | $\Delta E_{\text{S1-T1}}$<br>(meV) <sup>f</sup> | $\tau_{\text{DP}} / \tau_{\text{PF}}$<br>( $\mu\text{s} / \text{ns}$ ) <sup>g</sup> |
|----------------------------------|------------------------------------------|-----------------------------------------|---------------------------------------|---------------------|-------------------------------------------------|-------------------------------------------------------------------------------------|
| [Au( <sup>Dipp</sup> PZI)(ACD)]  | 462                                      | 598                                     | 0.12                                  | 0.35                | 40 <sup>g</sup>                                 | N.D. <sup>h</sup> / 20                                                              |
| [Au( <sup>Dipp</sup> PZI)(Cz)]   | 475                                      | 607                                     | 0.11                                  | 0.13                | 55 <sup>g</sup>                                 | 76 / 15                                                                             |
| [Au( <sup>Dipp</sup> PZI)(DPA)]  | 549                                      | 710                                     | 0.017                                 | 0.003               | 49 <sup>g</sup>                                 | 39 / 40                                                                             |
| [Au( <sup>Dipp</sup> PZI)(DPAC)] | 560                                      | 717                                     | 0.018                                 | 0.005               | 64 <sup>g</sup>                                 | 34 / 10                                                                             |
| [Au( <sup>Dipp</sup> PZI)(DMAC)] | 590                                      | 760                                     | 0.005                                 | 0.001               | 52 <sup>g</sup>                                 | 23 / 14                                                                             |
| [Au( <sup>Dipp</sup> PZI)(PXZ)]  | 619                                      | 808                                     | 0.004                                 | 0.001               | 110 <sup>g</sup>                                | N.D. <sup>h</sup> / N.D. <sup>h</sup>                                               |

<sup>a</sup>10  $\mu\text{M}$  Au(I) complexes dissolved in toluene, 298 K. <sup>b</sup>Absorption peak wavelength. <sup>c</sup>Emission peak wavelength. <sup>d</sup>Weighted average photoluminescence lifetime determined through triexponential fits of the photoluminescence decay traces monitored after pulsed laser photoexcitation at 377 nm. Detection wavelengths: [Au(<sup>Dipp</sup>PZI)(ACD)], 598 nm; [Au(<sup>Dipp</sup>PZI)(Cz)], 607 nm; [Au(<sup>Dipp</sup>PZI)(DPA)], 710 nm; [Au(<sup>Dipp</sup>PZI)(DPAC)], 717 nm; [Au(<sup>Dipp</sup>PZI)(DMAC)], 760 nm; [Au(<sup>Dipp</sup>PZI)(PXZ)], 808 nm. <sup>e</sup>Photoluminescence quantum yields for 10  $\mu\text{M}$  Au(I) complex in deaerated toluene determined relatively using 9,10-diphenylanthracene as a standard (toluene,  $\Phi = 1.00$ ) at 298 K. <sup>f</sup>Energy difference between the singlet and the triplet excited states. <sup>g</sup>Lifetime of delayed photoluminescence ( $\tau_{\text{DP}}$ ) and prompt fluorescence ( $\tau_{\text{PF}}$ ) which were determined through nonlinear least-squares fits of variable-temperature photoluminescence lifetime data for Zeonex films doped with 5 wt % Au(I) complexes (quartz substrate). <sup>h</sup>Not determined due to low photoluminescence intensities.

**Table S13.** Geometry parameters of the ground ( $S_0$ ),  $S_1$ , and  $T_1$  states of the Au(I) complexes

|                                  | Au–C <sub>carbene</sub> (Å) <sup>a</sup> |                |                | Au–N <sub>amido</sub> (Å) <sup>b</sup> |                |                | C <sub>carbene</sub> –Au–N <sub>amido</sub> (°) <sup>c</sup> |                |                | dihedral angle (°) <sup>d</sup> |                |                |
|----------------------------------|------------------------------------------|----------------|----------------|----------------------------------------|----------------|----------------|--------------------------------------------------------------|----------------|----------------|---------------------------------|----------------|----------------|
|                                  | S <sub>0</sub><br>(crystal/cal)          | S <sub>1</sub> | T <sub>1</sub> | S <sub>0</sub><br>(crystal/cal)        | S <sub>1</sub> | T <sub>1</sub> | S <sub>0</sub><br>(crystal/cal)                              | S <sub>1</sub> | T <sub>1</sub> | S <sub>0</sub><br>(crystal/cal) | S <sub>1</sub> | T <sub>1</sub> |
| [Au( <sup>D</sup> ippPZI)(ACD)]  | 1.970/2.006                              | 2.016          | 2.000          | 2.040/2.080                            | 2.184          | 2.135          | 179/180                                                      | 180            | 180            | 11/0.0                          | 90             | 2.6            |
| [Au( <sup>D</sup> ippPZI)(Cz)]   | 1.982/2.003                              | 2.042          | 1.996          | 2.021/2.038                            | 2.145          | 2.085          | 174/180                                                      | 179            | 180            | 0.3/0.0                         | 0              | 0              |
| [Au( <sup>D</sup> ippPZI)(DPA)]  | 2.000/2.000                              | 2.019          | 1.996          | 2.063/2.055                            | 2.166          | 2.136          | 177/180                                                      | 180            | 180            | 24/12                           | 77             | 22             |
| [Au( <sup>D</sup> ippPZI)(DPAC)] | 1.956/2.001                              | 2.017          | 1.996          | 2.036/2.058                            | 2.171          | 2.143          | 177/177                                                      | 179            | 179            | 2.8/1.8                         | 90             | 3.6            |
| [Au( <sup>D</sup> ippPZI)(DMAC)] | 1.968/2.001                              | 2.019          | 1.996          | 2.027/2.056                            | 2.180          | 2.153          | 179/177                                                      | 180            | 180            | 3.5/4.3                         | 90             | 0.0            |
| [Au( <sup>D</sup> ippPZI)(PXZ)]  | N.D. <sup>e</sup> /1.999                 | 2.018          | 1.994          | N.D. <sup>e</sup> /2.056               | 2.163          | 2.137          | N.D. <sup>e</sup> /180                                       | 180            | 180            | N.D. <sup>e</sup> /0.0          | 90             | 3.6            |

<sup>a</sup>Bond length between Au and the C atom in the carbene ligand. <sup>b</sup>Bond length between Au and the N atom in the amido ligand. <sup>c</sup>Angle between Au–C<sub>carbene</sub> and Au–N<sub>amido</sub> bonds. <sup>d</sup>Dihedral angle between N<sub>carbene</sub>–C<sub>carbene</sub> and N<sub>amido</sub>–C<sub>amido</sub> bonds. Here, N<sub>carbene</sub> and C<sub>amido</sub> refer to the nitrogen and carbon atoms connected directly to C<sub>carbene</sub> and N<sub>amido</sub>, respectively. <sup>e</sup>Single crystal was not obtained.

**Table S14.** Cartesian coordinate for the optimized T<sub>1</sub> geometry of [Au(D<sup>ipp</sup>PZI)(ACD)]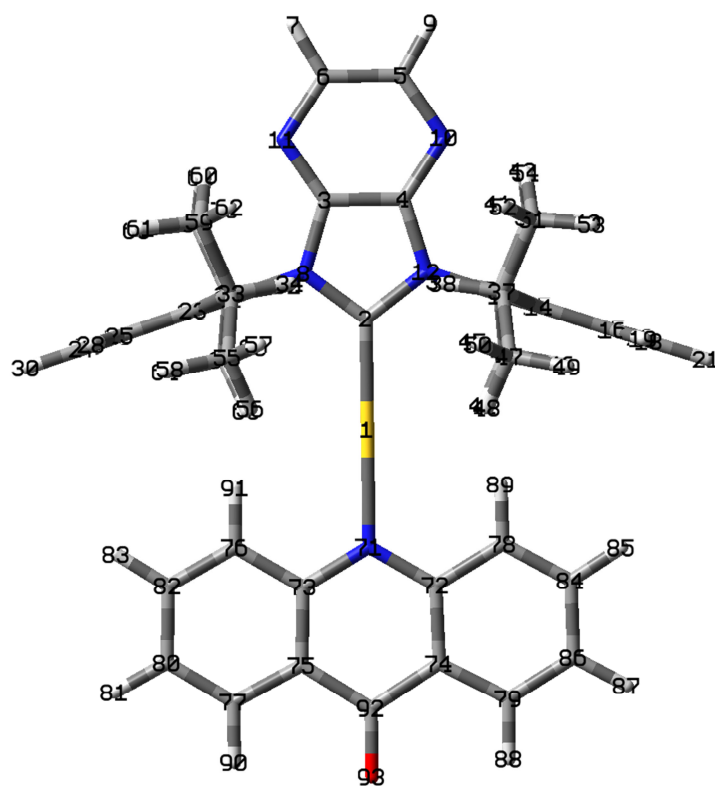

| label | atomic number | coordinates (Å) |           |           |
|-------|---------------|-----------------|-----------|-----------|
|       |               | <i>x</i>        | <i>y</i>  | <i>z</i>  |
| 1     | 79            | -0.70066        | -0.000009 | 0.000003  |
| 2     | 6             | 1.299282        | -0.000011 | -0.000005 |
| 3     | 6             | 3.461177        | 0.703283  | 0.011532  |
| 4     | 6             | 3.461166        | -0.703342 | -0.01153  |
| 5     | 6             | 5.687779        | -0.691412 | -0.01122  |
| 6     | 6             | 5.687788        | 0.691328  | 0.011211  |
| 7     | 1             | 6.626385        | 1.236173  | 0.020055  |
| 8     | 7             | 2.134058        | 1.101286  | 0.018268  |
| 9     | 1             | 6.626369        | -1.23627  | -0.02006  |
| 10    | 7             | 4.554345        | -1.456017 | -0.02371  |
| 11    | 7             | 4.554364        | 1.455946  | 0.023708  |
| 12    | 7             | 2.134041        | -1.101327 | -0.01825  |
| 13    | 6             | 1.679519        | -2.468886 | -0.03745  |
| 14    | 6             | 1.468524        | -3.12849  | 1.18685   |
| 15    | 6             | 1.484876        | -3.100667 | -1.27887  |
| 16    | 6             | 1.028331        | -4.454475 | 1.140301  |
| 17    | 6             | 1.044101        | -4.427233 | -1.26801  |
| 18    | 6             | 0.8146          | -5.097788 | -0.07282  |

|    |   |          |           |          |
|----|---|----------|-----------|----------|
| 19 | 1 | 0.86353  | -4.994848 | 2.066225 |
| 20 | 1 | 0.890429 | -4.946373 | -2.20783 |
| 21 | 1 | 0.480912 | -6.130984 | -0.08677 |
| 22 | 6 | 1.679563 | 2.468855  | 0.037467 |
| 23 | 6 | 1.484909 | 3.100634  | 1.278886 |
| 24 | 6 | 1.46864  | 3.128481  | -1.18684 |
| 25 | 6 | 1.044184 | 4.427216  | 1.268015 |
| 26 | 6 | 1.028498 | 4.454483  | -1.14029 |
| 27 | 6 | 0.814747 | 5.097792  | 0.072826 |
| 28 | 1 | 0.890506 | 4.946354  | 2.207843 |
| 29 | 1 | 0.863755 | 4.994871  | -2.06622 |
| 30 | 1 | 0.4811   | 6.131001  | 0.086775 |
| 31 | 6 | 1.75614  | 2.466707  | -2.5288  |
| 32 | 1 | 1.916842 | 1.401848  | -2.34797 |
| 33 | 6 | 1.789326 | 2.409227  | 2.602073 |
| 34 | 1 | 1.950512 | 1.349068  | 2.395606 |
| 35 | 6 | 1.789355 | -2.409278 | -2.60206 |
| 36 | 1 | 1.950547 | -1.349119 | -2.39559 |
| 37 | 6 | 1.756005 | -2.4667   | 2.528812 |
| 38 | 1 | 1.916675 | -1.401838 | 2.347961 |
| 39 | 6 | 3.092873 | -2.963416 | -3.20826 |
| 40 | 1 | 2.990576 | -4.021773 | -3.46728 |
| 41 | 1 | 3.35281  | -2.420491 | -4.12217 |
| 42 | 1 | 3.922536 | -2.867683 | -2.50483 |
| 43 | 6 | 0.622164 | -2.497387 | -3.59855 |
| 44 | 1 | -0.29854 | -2.093047 | -3.17023 |
| 45 | 1 | 0.852315 | -1.923786 | -4.50099 |
| 46 | 1 | 0.423159 | -3.526061 | -3.9122  |
| 47 | 6 | 0.577653 | -2.578839 | 3.509676 |
| 48 | 1 | -0.33853 | -2.165234 | 3.080335 |
| 49 | 1 | 0.37602  | -3.614504 | 3.797753 |
| 50 | 1 | 0.796773 | -2.025573 | 4.42739  |
| 51 | 6 | 3.053637 | -3.031761 | 3.137467 |
| 52 | 1 | 3.30265  | -2.508148 | 4.065566 |
| 53 | 1 | 2.950417 | -4.095585 | 3.372569 |
| 54 | 1 | 3.891091 | -2.920001 | 2.445665 |
| 55 | 6 | 0.622089 | 2.497346  | 3.598513 |
| 56 | 1 | -0.2986  | 2.092997  | 3.170162 |
| 57 | 1 | 0.852201 | 1.92376   | 4.500976 |
| 58 | 1 | 0.423068 | 3.526025  | 3.912136 |
| 59 | 6 | 3.092823 | 2.963338  | 3.20834  |
| 60 | 1 | 3.922519 | 2.867585  | 2.504954 |
| 61 | 1 | 2.99054  | 4.021697  | 3.467354 |
| 62 | 1 | 3.352702 | 2.420407  | 4.12226  |
| 63 | 6 | 0.577769 | 2.578829  | -3.50965 |

|    |   |          |           |          |
|----|---|----------|-----------|----------|
| 64 | 1 | 0.376067 | 3.6145    | -3.79765 |
| 65 | 1 | 0.796911 | 2.02563   | -4.4274  |
| 66 | 1 | -0.33838 | 2.16514   | -3.08032 |
| 67 | 6 | 3.053752 | 3.031803  | -3.13746 |
| 68 | 1 | 2.950525 | 4.095634  | -3.37253 |
| 69 | 1 | 3.891216 | 2.920026  | -2.44567 |
| 70 | 1 | 3.302759 | 2.508222  | -4.06558 |
| 71 | 7 | -2.8353  | 0.000019  | 0.00001  |
| 72 | 6 | -3.52939 | -1.193415 | 0.034707 |
| 73 | 6 | -3.52936 | 1.193472  | -0.0347  |
| 74 | 6 | -4.95595 | -1.238592 | 0.033653 |
| 75 | 6 | -4.95592 | 1.238683  | -0.03372 |
| 76 | 6 | -2.81398 | 2.412425  | -0.07247 |
| 77 | 6 | -5.60422 | 2.474948  | -0.06622 |
| 78 | 6 | -2.81404 | -2.412382 | 0.07252  |
| 79 | 6 | -5.60428 | -2.474842 | 0.066127 |
| 80 | 6 | -4.8792  | 3.661146  | -0.10049 |
| 81 | 1 | -5.39947 | 4.612863  | -0.1252  |
| 82 | 6 | -3.4793  | 3.626602  | -0.10437 |
| 83 | 1 | -2.90648 | 4.546531  | -0.13253 |
| 84 | 6 | -3.47939 | -3.626543 | 0.104397 |
| 85 | 1 | -2.90659 | -4.546484 | 0.132588 |
| 86 | 6 | -4.87929 | -3.661056 | 0.100445 |
| 87 | 1 | -5.39958 | -4.612761 | 0.125129 |
| 88 | 1 | -6.6879  | -2.473493 | 0.06376  |
| 89 | 1 | -1.73027 | -2.390336 | 0.076997 |
| 90 | 1 | -6.68783 | 2.473625  | -0.0639  |
| 91 | 1 | -1.73021 | 2.390354  | -0.07689 |
| 92 | 6 | -5.74149 | 0.000055  | -5.1E-05 |
| 93 | 8 | -6.97791 | 0.000071  | -8.8E-05 |

---

**Table S15.** Cartesian coordinate for the optimized T<sub>1</sub> geometry of [Au(DippPZI)(Cz)]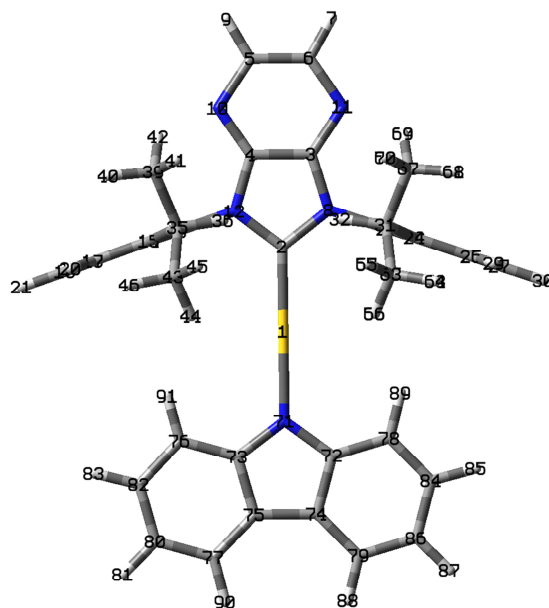

| label | atomic number | coordinates (Å) |           |           |
|-------|---------------|-----------------|-----------|-----------|
|       |               | <i>x</i>        | <i>y</i>  | <i>z</i>  |
| 1     | 79            | 0.842949        | -0.00046  | -0.00006  |
| 2     | 6             | -1.153107       | 0.000191  | -0.000062 |
| 3     | 6             | -3.320573       | 0.707173  | 0.000284  |
| 4     | 6             | -3.321149       | -0.70502  | 0.000267  |
| 5     | 6             | -5.549667       | -0.687912 | 0.000538  |
| 6     | 6             | -5.549105       | 0.691883  | 0.000554  |
| 7     | 1             | -6.48871        | 1.235653  | 0.000676  |
| 8     | 7             | -1.998162       | 1.103628  | 0.000095  |
| 9     | 1             | -6.489715       | -1.230915 | 0.000646  |
| 10    | 7             | -4.415054       | -1.461528 | 0.000387  |
| 11    | 7             | -4.413861       | 1.464575  | 0.000422  |
| 12    | 7             | -1.999061       | -1.102562 | 0.000067  |
| 13    | 6             | -1.537707       | -2.465828 | -0.000063 |
| 14    | 6             | -1.324422       | -3.109474 | -1.232352 |
| 15    | 6             | -1.324306       | -3.109664 | 1.232109  |
| 16    | 6             | -0.865399       | -4.429684 | -1.204432 |
| 17    | 6             | -0.865294       | -4.429872 | 1.203941  |
| 18    | 6             | -0.633567       | -5.083476 | -0.000307 |
| 19    | 1             | -0.699153       | -4.957341 | -2.137542 |
| 20    | 1             | -0.698966       | -4.957674 | 2.136955  |
| 21    | 1             | -0.283631       | -6.111548 | -0.000402 |
| 22    | 6             | -1.535655       | 2.466501  | 0.000008  |
| 23    | 6             | -1.32184        | 3.11001   | -1.232263 |

|    |   |           |           |           |
|----|---|-----------|-----------|-----------|
| 24 | 6 | -1.321719 | 3.11012   | 1.232201  |
| 25 | 6 | -0.861688 | 4.429826  | -1.204303 |
| 26 | 6 | -0.861577 | 4.429935  | 1.204076  |
| 27 | 6 | -0.629302 | 5.083381  | -0.000154 |
| 28 | 1 | -0.694998 | 4.957378  | -2.137394 |
| 29 | 1 | -0.694799 | 4.95757   | 2.137105  |
| 30 | 1 | -0.278513 | 6.111162  | -0.000217 |
| 31 | 6 | -1.631324 | 2.43534   | 2.562488  |
| 32 | 1 | -1.778397 | 1.371057  | 2.367831  |
| 33 | 6 | -1.631637 | 2.435128  | -2.562453 |
| 34 | 1 | -1.778676 | 1.370861  | -2.367689 |
| 35 | 6 | -1.63331  | -2.434679 | 2.562431  |
| 36 | 1 | -1.77955  | -1.370275 | 2.367819  |
| 37 | 6 | -1.633601 | -2.434299 | -2.562536 |
| 38 | 1 | -1.779835 | -1.369927 | -2.367746 |
| 39 | 6 | -2.949456 | -2.982899 | 3.146352  |
| 40 | 1 | -2.861448 | -4.046686 | 3.388898  |
| 41 | 1 | -3.212941 | -2.451393 | 4.066148  |
| 42 | 1 | -3.769827 | -2.865649 | 2.435379  |
| 43 | 6 | -0.47842  | -2.548923 | 3.570043  |
| 44 | 1 | 0.451239  | -2.151054 | 3.154708  |
| 45 | 1 | -0.710733 | -1.98122  | 4.47579   |
| 46 | 1 | -0.296002 | -3.583186 | 3.876166  |
| 47 | 6 | -0.478845 | -2.548378 | -3.570314 |
| 48 | 1 | 0.450857  | -2.150524 | -3.155059 |
| 49 | 1 | -0.296432 | -3.582597 | -3.87659  |
| 50 | 1 | -0.711308 | -1.980575 | -4.475961 |
| 51 | 6 | -2.949816 | -2.982456 | -3.146373 |
| 52 | 1 | -3.213419 | -2.450822 | -4.066062 |
| 53 | 1 | -2.86182  | -4.046206 | -3.389081 |
| 54 | 1 | -3.770104 | -2.865322 | -2.435286 |
| 55 | 6 | -0.476874 | 2.548346  | -3.570312 |
| 56 | 1 | 0.452542  | 2.149718  | -3.15516  |
| 57 | 1 | -0.70987  | 1.980788  | -4.475976 |
| 58 | 1 | -0.293656 | 3.582436  | -3.87654  |
| 59 | 6 | -2.94747  | 2.984331  | -3.146176 |
| 60 | 1 | -3.767803 | 2.867814  | -2.435038 |
| 61 | 1 | -2.858658 | 4.04802   | -3.388859 |
| 62 | 1 | -3.211544 | 2.452932  | -4.065863 |
| 63 | 6 | -0.476398 | 2.548627  | 3.570159  |
| 64 | 1 | -0.293131 | 3.582739  | 3.876287  |
| 65 | 1 | -0.70924  | 1.981126  | 4.475897  |
| 66 | 1 | 0.452951  | 2.149976  | 3.154879  |
| 67 | 6 | -2.947063 | 2.984589  | 3.146366  |
| 68 | 1 | -2.858214 | 4.048293  | 3.388973  |

|    |   |           |           |           |
|----|---|-----------|-----------|-----------|
| 69 | 1 | -3.767494 | 2.86803   | 2.435348  |
| 70 | 1 | -3.211013 | 2.453246  | 4.066123  |
| 71 | 7 | 2.92775   | -0.000802 | -0.000124 |
| 72 | 6 | 3.746948  | 1.110711  | -0.000088 |
| 73 | 6 | 3.746711  | -1.112491 | -0.000034 |
| 74 | 6 | 5.119193  | 0.729669  | 0.000037  |
| 75 | 6 | 5.119038  | -0.731737 | 0.000071  |
| 76 | 6 | 3.359647  | -2.457156 | -0.000045 |
| 77 | 6 | 6.102207  | -1.703308 | 0.000175  |
| 78 | 6 | 3.360157  | 2.455456  | -0.000166 |
| 79 | 6 | 6.102562  | 1.701038  | 0.000094  |
| 80 | 6 | 5.713776  | -3.055101 | 0.00017   |
| 81 | 1 | 6.476731  | -3.826174 | 0.000253  |
| 82 | 6 | 4.365633  | -3.422825 | 0.000061  |
| 83 | 1 | 4.096111  | -4.473004 | 0.000058  |
| 84 | 6 | 4.366344  | 3.420916  | -0.000108 |
| 85 | 1 | 4.097036  | 4.47115   | -0.000165 |
| 86 | 6 | 5.71441   | 3.052912  | 0.000022  |
| 87 | 1 | 6.477525  | 3.823826  | 0.000066  |
| 88 | 1 | 7.155332  | 1.43811   | 0.000194  |
| 89 | 1 | 2.311282  | 2.73054   | -0.000269 |
| 90 | 1 | 7.155031  | -1.440598 | 0.000262  |
| 91 | 1 | 2.310716  | -2.73202  | -0.000132 |

---



**Table S16.** Cartesian coordinate for the optimized T<sub>1</sub> geometry of [Au(DiPPZl)(DPA)]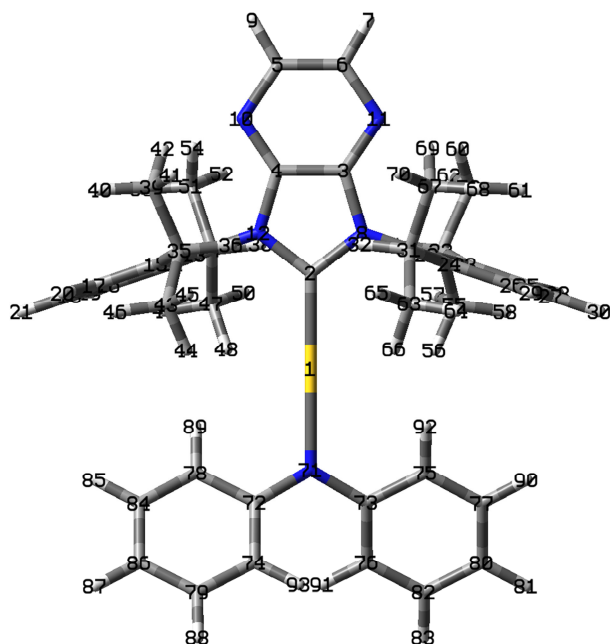

| label | atomic number | coordinates (Å) |           |           |
|-------|---------------|-----------------|-----------|-----------|
|       |               | <i>x</i>        | <i>y</i>  | <i>z</i>  |
| 1     | 79            | 0.916099        | 0.000011  | 0.000009  |
| 2     | 6             | -1.079707       | -0.00001  | 0.000016  |
| 3     | 6             | -3.248448       | 0.698754  | 0.095516  |
| 4     | 6             | -3.248429       | -0.698811 | -0.09566  |
| 5     | 6             | -5.478126       | -0.682364 | -0.094696 |
| 6     | 6             | -5.478143       | 0.682266  | 0.094427  |
| 7     | 1             | -6.417016       | 1.222091  | 0.169375  |
| 8     | 7             | -1.923957       | 1.093214  | 0.147783  |
| 9     | 1             | -6.416985       | -1.222207 | -0.169695 |
| 10    | 7             | -4.341044       | -1.447371 | -0.20014  |
| 11    | 7             | -4.341082       | 1.447294  | 0.199935  |
| 12    | 7             | -1.923927       | -1.09325  | -0.147827 |
| 13    | 6             | -1.466975       | -2.445012 | -0.329759 |
| 14    | 6             | -1.266209       | -2.92397  | -1.63725  |
| 15    | 6             | -1.258275       | -3.248187 | 0.806016  |
| 16    | 6             | -0.824263       | -4.242229 | -1.785371 |
| 17    | 6             | -0.818043       | -4.559515 | 0.602298  |
| 18    | 6             | -0.599541       | -5.052221 | -0.678606 |
| 19    | 1             | -0.667469       | -4.64521  | -2.780218 |
| 20    | 1             | -0.656701       | -5.207808 | 1.456949  |
| 21    | 1             | -0.266458       | -6.076821 | -0.815869 |
| 22    | 6             | -1.467047       | 2.444985  | 0.329763  |

|    |   |           |           |           |
|----|---|-----------|-----------|-----------|
| 23 | 6 | -1.258305 | 3.248186  | -0.805988 |
| 24 | 6 | -1.266372 | 2.923926  | 1.637272  |
| 25 | 6 | -0.818124 | 4.559523  | -0.602221 |
| 26 | 6 | -0.824484 | 4.2422    | 1.785442  |
| 27 | 6 | -0.599721 | 5.052217  | 0.678705  |
| 28 | 1 | -0.656747 | 5.207835  | -1.456852 |
| 29 | 1 | -0.667764 | 4.645168  | 2.780306  |
| 30 | 1 | -0.266679 | 6.076826  | 0.816005  |
| 31 | 6 | -1.575587 | 2.076148  | 2.864575  |
| 32 | 1 | -1.693419 | 1.042813  | 2.532278  |
| 33 | 6 | -1.556784 | 2.749893  | -2.214224 |
| 34 | 1 | -1.673091 | 1.665556  | -2.163472 |
| 35 | 6 | -1.556845 | -2.749877 | 2.214227  |
| 36 | 1 | -1.673163 | -1.665542 | 2.163451  |
| 37 | 6 | -1.5754   | -2.076227 | -2.864583 |
| 38 | 1 | -1.693255 | -1.042884 | -2.532314 |
| 39 | 6 | -2.890767 | -3.335415 | 2.716586  |
| 40 | 1 | -2.831255 | -4.423873 | 2.817497  |
| 41 | 1 | -3.146029 | -2.922613 | 3.697604  |
| 42 | 1 | -3.703718 | -3.104472 | 2.025287  |
| 43 | 6 | -0.413065 | -3.029586 | 3.201957  |
| 44 | 1 | 0.530782  | -2.60671  | 2.847989  |
| 45 | 1 | -0.637993 | -2.581148 | 4.174091  |
| 46 | 1 | -0.262285 | -4.100204 | 3.368903  |
| 47 | 6 | -0.438405 | -2.084088 | -3.898612 |
| 48 | 1 | 0.506881  | -1.762579 | -3.453151 |
| 49 | 1 | -0.285013 | -3.073464 | -4.33932  |
| 50 | 1 | -0.670888 | -1.399053 | -4.719205 |
| 51 | 6 | -2.912136 | -2.51515  | -3.493326 |
| 52 | 1 | -3.176097 | -1.862054 | -4.331132 |
| 53 | 1 | -2.851743 | -3.539519 | -3.874787 |
| 54 | 1 | -3.719657 | -2.474946 | -2.75959  |
| 55 | 6 | -0.412949 | 3.029631  | -3.201883 |
| 56 | 1 | 0.530884  | 2.606768  | -2.847863 |
| 57 | 1 | -0.63781  | 2.581197  | -4.174034 |
| 58 | 1 | -0.262178 | 4.100253  | -3.368811 |
| 59 | 6 | -2.890683 | 3.335424  | -2.716654 |
| 60 | 1 | -3.70367  | 3.104466  | -2.025403 |
| 61 | 1 | -2.831174 | 4.423883  | -2.817549 |
| 62 | 1 | -3.145885 | 2.922629  | -3.697691 |
| 63 | 6 | -0.43861  | 2.084002  | 3.898625  |
| 64 | 1 | -0.285234 | 3.073373  | 4.339351  |
| 65 | 1 | -0.6711   | 1.398951  | 4.719204  |
| 66 | 1 | 0.506685  | 1.762509  | 3.453173  |
| 67 | 6 | -2.912342 | 2.515032  | 3.493302  |

|    |   |           |           |           |
|----|---|-----------|-----------|-----------|
| 68 | 1 | -2.85198  | 3.539393  | 3.874791  |
| 69 | 1 | -3.719848 | 2.47483   | 2.75955   |
| 70 | 1 | -3.176308 | 1.86191   | 4.331086  |
| 71 | 7 | 3.052445  | 0.000033  | 0.000018  |
| 72 | 6 | 3.735489  | -1.172815 | 0.288128  |
| 73 | 6 | 3.735478  | 1.172886  | -0.288089 |
| 74 | 6 | 5.002563  | -1.183227 | 0.921039  |
| 75 | 6 | 3.111581  | 2.412675  | -0.013773 |
| 76 | 6 | 5.00255   | 1.183313  | -0.921004 |
| 77 | 6 | 3.751879  | 3.604264  | -0.310925 |
| 78 | 6 | 3.111604  | -2.41261  | 0.013817  |
| 79 | 6 | 5.621252  | -2.383665 | 1.233476  |
| 80 | 6 | 5.009398  | 3.599638  | -0.919856 |
| 81 | 1 | 5.499558  | 4.535317  | -1.166303 |
| 82 | 6 | 5.621225  | 2.383757  | -1.233441 |
| 83 | 1 | 6.580144  | 2.37318   | -1.740744 |
| 84 | 6 | 3.751916  | -3.604192 | 0.310968  |
| 85 | 1 | 3.261453  | -4.542415 | 0.076471  |
| 86 | 6 | 5.009438  | -3.599552 | 0.919894  |
| 87 | 1 | 5.499608  | -4.535226 | 1.16634   |
| 88 | 1 | 6.580173  | -2.373076 | 1.740777  |
| 89 | 1 | 2.13152   | -2.418551 | -0.448955 |
| 90 | 1 | 3.261408  | 4.542482  | -0.076424 |
| 91 | 1 | 5.462803  | 0.247614  | -1.211956 |
| 92 | 1 | 2.131499  | 2.418602  | 0.449004  |
| 93 | 1 | 5.462807  | -0.247523 | 1.211989  |

---

**Table S17.** Cartesian coordinate for the optimized T<sub>1</sub> geometry of [Au(D<sup>ipp</sup>PZI)(DPAC)]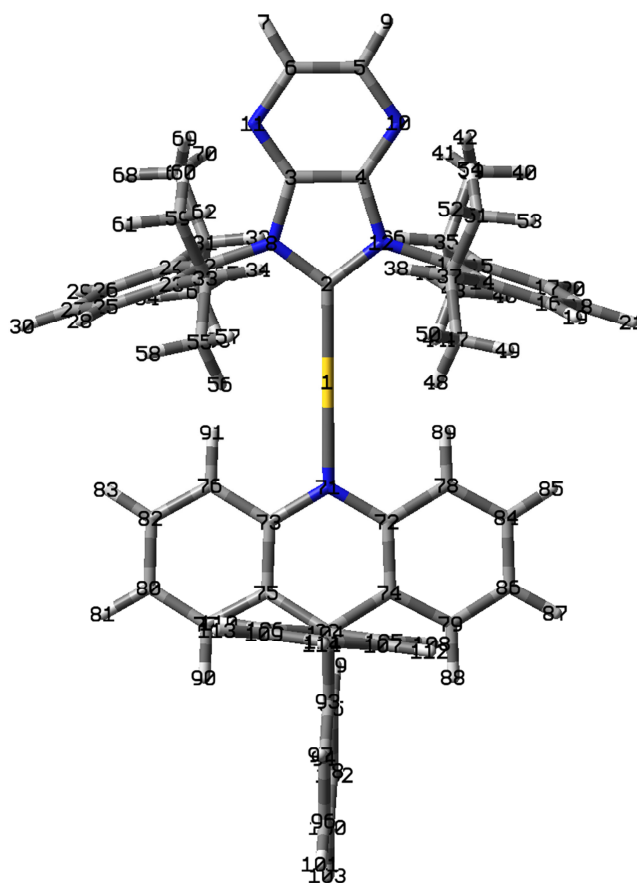

| label | atomic number | coordinates (Å) |           |           |
|-------|---------------|-----------------|-----------|-----------|
|       |               | x               | y         | z         |
| 1     | 79            | 0.37915         | -0.007575 | -0.259237 |
| 2     | 6             | 2.360058        | 0.002548  | -0.019087 |
| 3     | 6             | 4.502911        | 0.719592  | 0.29453   |
| 4     | 6             | 4.511845        | -0.690588 | 0.286978  |
| 5     | 6             | 6.719301        | -0.661873 | 0.598595  |
| 6     | 6             | 6.710541        | 0.715764  | 0.606024  |
| 7     | 1             | 7.636762        | 1.265977  | 0.740007  |
| 8     | 7             | 3.189299        | 1.109788  | 0.107521  |
| 9     | 1             | 7.652467        | -1.201661 | 0.726685  |
| 10    | 7             | 5.598519        | -1.440149 | 0.435163  |
| 11    | 7             | 5.579905        | 1.48137   | 0.450869  |
| 12    | 7             | 3.203273        | -1.095522 | 0.095947  |
| 13    | 6             | 2.761333        | -2.462146 | 0.019185  |
| 14    | 6             | 2.398583        | -3.125362 | 1.205335  |
| 15    | 6             | 2.728043        | -3.094877 | -1.23714  |
| 16    | 6             | 1.971586        | -4.452682 | 1.102722  |
| 17    | 6             | 2.292564        | -4.422864 | -1.284148 |
| 18    | 6             | 1.914505        | -5.095142 | -0.127859 |

|    |   |          |           |           |
|----|---|----------|-----------|-----------|
| 19 | 1 | 1.691451 | -4.994701 | 1.999632  |
| 20 | 1 | 2.264209 | -4.942994 | -2.235627 |
| 21 | 1 | 1.588282 | -6.129533 | -0.184392 |
| 22 | 6 | 2.729607 | 2.47117   | 0.043557  |
| 23 | 6 | 2.350833 | 3.116037  | 1.234768  |
| 24 | 6 | 2.694138 | 3.11716   | -1.20583  |
| 25 | 6 | 1.906294 | 4.438402  | 1.144386  |
| 26 | 6 | 2.240626 | 4.439552  | -1.240759 |
| 27 | 6 | 1.847095 | 5.093739  | -0.079263 |
| 28 | 1 | 1.613174 | 4.966171  | 2.045611  |
| 29 | 1 | 2.210761 | 4.969759  | -2.186659 |
| 30 | 1 | 1.506417 | 6.123925  | -0.126151 |
| 31 | 6 | 3.194114 | 2.444624  | -2.478274 |
| 32 | 1 | 3.29825  | 1.378008  | -2.270448 |
| 33 | 6 | 2.471508 | 2.440766  | 2.594927  |
| 34 | 1 | 2.647455 | 1.376754  | 2.42438   |
| 35 | 6 | 3.213292 | -2.402157 | -2.504558 |
| 36 | 1 | 3.297471 | -1.335534 | -2.287693 |
| 37 | 6 | 2.518608 | -2.464002 | 2.572412  |
| 38 | 1 | 2.682839 | -1.396365 | 2.413026  |
| 39 | 6 | 4.618245 | -2.909412 | -2.8838   |
| 40 | 1 | 4.596921 | -3.972843 | -3.142897 |
| 41 | 1 | 5.003405 | -2.362271 | -3.750032 |
| 42 | 1 | 5.317951 | -2.777384 | -2.05612  |
| 43 | 6 | 2.231449 | -2.541978 | -3.678607 |
| 44 | 1 | 1.237728 | -2.171065 | -3.413877 |
| 45 | 1 | 2.586137 | -1.963101 | -4.53636  |
| 46 | 1 | 2.127836 | -3.578845 | -4.011415 |
| 47 | 6 | 1.238555 | -2.596675 | 3.413222  |
| 48 | 1 | 0.371276 | -2.194575 | 2.883215  |
| 49 | 1 | 1.021499 | -3.636106 | 3.676548  |
| 50 | 1 | 1.345152 | -2.042337 | 4.350379  |
| 51 | 6 | 3.747197 | -3.011051 | 3.324566  |
| 52 | 1 | 3.878092 | -2.488479 | 4.277354  |
| 53 | 1 | 3.635613 | -4.078148 | 3.541934  |
| 54 | 1 | 4.655997 | -2.879334 | 2.73387   |
| 55 | 6 | 1.186251 | 2.550658  | 3.431125  |
| 56 | 1 | 0.325562 | 2.146319  | 2.892082  |
| 57 | 1 | 1.294056 | 1.986107  | 4.362022  |
| 58 | 1 | 0.957682 | 3.584666  | 3.705938  |
| 59 | 6 | 3.690844 | 2.99199   | 3.359007  |
| 60 | 1 | 4.603814 | 2.876377  | 2.771334  |
| 61 | 1 | 3.567203 | 4.055394  | 3.587643  |
| 62 | 1 | 3.822719 | 2.460165  | 4.306527  |
| 63 | 6 | 2.210382 | 2.57562   | -3.651709 |

|     |   |           |           |           |
|-----|---|-----------|-----------|-----------|
| 64  | 1 | 2.084373  | 3.613503  | -3.973505 |
| 65  | 1 | 2.577552  | 2.01347   | -4.515303 |
| 66  | 1 | 1.225021  | 2.180079  | -3.391216 |
| 67  | 6 | 4.589628  | 2.981289  | -2.851481 |
| 68  | 1 | 4.549125  | 4.046448  | -3.101047 |
| 69  | 1 | 5.290522  | 2.854534  | -2.023978 |
| 70  | 1 | 4.985976  | 2.449173  | -3.722006 |
| 71  | 7 | -1.751749 | -0.016948 | -0.489354 |
| 72  | 6 | -2.444548 | -1.20654  | -0.56042  |
| 73  | 6 | -2.448507 | 1.164796  | -0.629518 |
| 74  | 6 | -3.863487 | -1.260916 | -0.496359 |
| 75  | 6 | -3.867036 | 1.218265  | -0.565849 |
| 76  | 6 | -1.721643 | 2.350363  | -0.897269 |
| 77  | 6 | -4.499517 | 2.426376  | -0.840681 |
| 78  | 6 | -1.712941 | -2.402607 | -0.760167 |
| 79  | 6 | -4.490428 | -2.484191 | -0.711497 |
| 80  | 6 | -3.771434 | 3.580321  | -1.137905 |
| 81  | 1 | -4.295712 | 4.506153  | -1.349753 |
| 82  | 6 | -2.376115 | 3.541716  | -1.148944 |
| 83  | 1 | -1.799402 | 4.434581  | -1.3626   |
| 84  | 6 | -2.362162 | -3.608102 | -0.948994 |
| 85  | 1 | -1.781876 | -4.509112 | -1.112769 |
| 86  | 6 | -3.757404 | -3.649969 | -0.943076 |
| 87  | 1 | -4.278146 | -4.58694  | -1.110031 |
| 88  | 1 | -5.572452 | -2.533833 | -0.691348 |
| 89  | 1 | -0.630608 | -2.353516 | -0.791225 |
| 90  | 1 | -5.58126  | 2.474646  | -0.809499 |
| 91  | 1 | -0.639088 | 2.304621  | -0.928262 |
| 92  | 6 | -4.639757 | -0.009183 | -0.076824 |
| 93  | 6 | -6.064263 | -0.019422 | -0.676127 |
| 94  | 6 | -7.219199 | 0.063481  | 0.102987  |
| 95  | 6 | -6.208915 | -0.096168 | -2.069817 |
| 96  | 6 | -8.484165 | 0.06508   | -0.490949 |
| 97  | 1 | -7.143066 | 0.127947  | 1.181089  |
| 98  | 6 | -7.465708 | -0.095292 | -2.662356 |
| 99  | 1 | -5.325184 | -0.157007 | -2.696636 |
| 100 | 6 | -8.613365 | -0.015289 | -1.872129 |
| 101 | 1 | -9.367286 | 0.129837  | 0.136679  |
| 102 | 1 | -7.550546 | -0.156295 | -3.742707 |
| 103 | 1 | -9.596002 | -0.014735 | -2.33261  |
| 104 | 6 | -4.678721 | 0.02424   | 1.49273   |
| 105 | 6 | -4.840696 | -1.155403 | 2.231215  |
| 106 | 6 | -4.602233 | 1.229208  | 2.201116  |
| 107 | 6 | -4.92938  | -1.131202 | 3.620688  |
| 108 | 1 | -4.895383 | -2.111121 | 1.726402  |

|     |   |           |           |          |
|-----|---|-----------|-----------|----------|
| 109 | 6 | -4.689341 | 1.255113  | 3.592281 |
| 110 | 1 | -4.471412 | 2.16516   | 1.674458 |
| 111 | 6 | -4.85308  | 0.075531  | 4.310694 |
| 112 | 1 | -5.051611 | -2.063518 | 4.162759 |
| 113 | 1 | -4.621159 | 2.205776  | 4.111449 |
| 114 | 1 | -4.913459 | 0.094623  | 5.393923 |

---

**Table S18.** Cartesian coordinate for the optimized T<sub>1</sub> geometry of [Au(D<sup>ipp</sup>PZI)(DMAC)]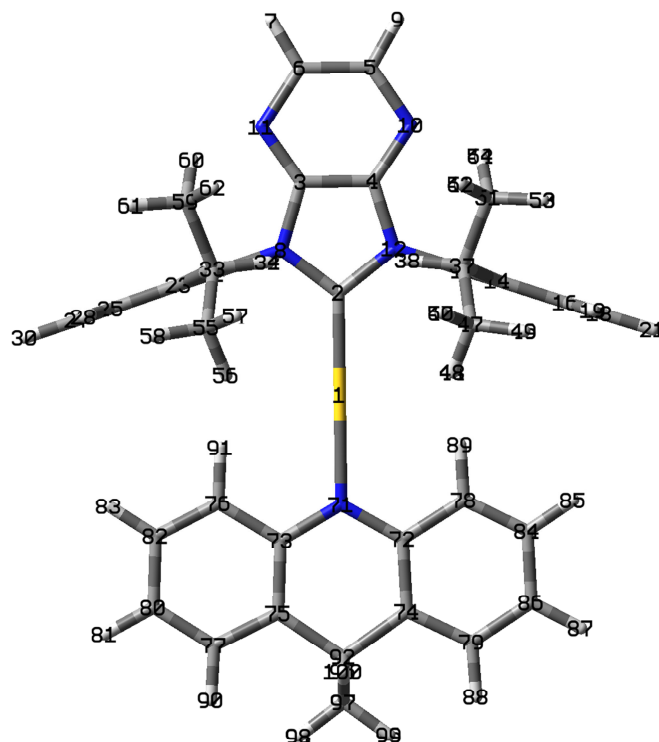

| label | atomic number | coordinates (Å) |           |           |
|-------|---------------|-----------------|-----------|-----------|
|       |               | <i>x</i>        | <i>y</i>  | <i>z</i>  |
| 1     | 79            | 0.559232        | -0.000009 | 0.000108  |
| 2     | 6             | -1.436777       | -0.000006 | -0.000023 |
| 3     | 6             | -3.606997       | -0.704999 | -0.000202 |
| 4     | 6             | -3.606993       | 0.704995  | -0.00024  |
| 5     | 6             | -5.836976       | 0.688861  | -0.00043  |
| 6     | 6             | -5.836981       | -0.688849 | -0.00039  |
| 7     | 1             | -6.775545       | -1.234355 | -0.000451 |
| 8     | 7             | -2.282246       | -1.103067 | -0.000073 |
| 9     | 1             | -6.775538       | 1.234373  | -0.000525 |
| 10    | 7             | -4.699772       | 1.459884  | -0.000354 |
| 11    | 7             | -4.699781       | -1.459879 | -0.00027  |
| 12    | 7             | -2.282242       | 1.103057  | -0.000134 |
| 13    | 6             | -1.828723       | 2.46826   | -0.0001   |
| 14    | 6             | -1.624363       | 3.11581   | 1.232055  |
| 15    | 6             | -1.624001       | 3.115755  | -1.232227 |
| 16    | 6             | -1.184817       | 4.442695  | 1.204199  |
| 17    | 6             | -1.184464       | 4.442639  | -1.204302 |
| 18    | 6             | -0.963522       | 5.100177  | -0.000033 |
| 19    | 1             | -1.026957       | 4.972866  | 2.137299  |
| 20    | 1             | -1.026326       | 4.972767  | -2.137379 |



|    |   |           |           |           |
|----|---|-----------|-----------|-----------|
| 21 | 1 | -0.63195  | 6.134417  | -0.000009 |
| 22 | 6 | -1.828714 | -2.468266 | 0.000035  |
| 23 | 6 | -1.62417  | -3.115694 | 1.232228  |
| 24 | 6 | -1.624147 | -3.115872 | -1.232057 |
| 25 | 6 | -1.184587 | -4.442566 | 1.204436  |
| 26 | 6 | -1.184575 | -4.442745 | -1.204066 |
| 27 | 6 | -0.963445 | -5.100159 | 0.000233  |
| 28 | 1 | -1.026571 | -4.972646 | 2.137561  |
| 29 | 1 | -1.026553 | -4.972956 | -2.137115 |
| 30 | 1 | -0.631844 | -6.13439  | 0.000313  |
| 31 | 6 | -1.926294 | -2.437018 | -2.562007 |
| 32 | 1 | -2.044763 | -1.36904  | -2.368292 |
| 33 | 6 | -1.926392 | -2.436646 | 2.562063  |
| 34 | 1 | -2.044575 | -1.368659 | 2.36822   |
| 35 | 6 | -1.925964 | 2.436763  | -2.56215  |
| 36 | 1 | -2.044273 | 1.36878   | -2.368365 |
| 37 | 6 | -1.926708 | 2.436892  | 2.561929  |
| 38 | 1 | -2.045239 | 1.368936  | 2.368134  |
| 39 | 6 | -3.259326 | 2.954895  | -3.134647 |
| 40 | 1 | -3.197021 | 4.020777  | -3.376271 |
| 41 | 1 | -3.517809 | 2.418707  | -4.053189 |
| 42 | 1 | -4.071214 | 2.818579  | -2.417475 |
| 43 | 6 | -0.783194 | 2.581699  | -3.579537 |
| 44 | 1 | 0.160958  | 2.210606  | -3.172417 |
| 45 | 1 | -1.007972 | 2.006404  | -4.48241  |
| 46 | 1 | -0.632625 | 3.620143  | -3.889055 |
| 47 | 6 | -0.784056 | 2.581573  | 3.579487  |
| 48 | 1 | 0.160045  | 2.210155  | 3.172544  |
| 49 | 1 | -0.633221 | 3.620002  | 3.888926  |
| 50 | 1 | -1.009148 | 2.00643   | 4.48238   |
| 51 | 6 | -3.260043 | 2.955322  | 3.134212  |
| 52 | 1 | -3.518786 | 2.419189  | 4.052712  |
| 53 | 1 | -3.197554 | 4.021191  | 3.375848  |
| 54 | 1 | -4.071843 | 2.819172  | 2.416909  |
| 55 | 6 | -0.783884 | -2.581636 | 3.579736  |
| 56 | 1 | 0.160403  | -2.210644 | 3.172836  |
| 57 | 1 | -1.008837 | -2.00628  | 4.482526  |
| 58 | 1 | -0.633487 | -3.620077 | 3.889345  |
| 59 | 6 | -3.259925 | -2.954672 | 3.134259  |
| 60 | 1 | -4.071637 | -2.818334 | 2.416893  |
| 61 | 1 | -3.197739 | -4.020551 | 3.375931  |
| 62 | 1 | -3.518588 | -2.418437 | 4.052723  |
| 63 | 6 | -0.783555 | -2.58185  | -3.579446 |
| 64 | 1 | -0.6328   | -3.620301 | -3.888847 |
| 65 | 1 | -1.0085   | -2.006706 | -4.482374 |

|     |   |           |           |           |
|-----|---|-----------|-----------|-----------|
| 66  | 1 | 0.160548  | -2.210523 | -3.172423 |
| 67  | 6 | -3.259608 | -2.955391 | -3.134399 |
| 68  | 1 | -3.197154 | -4.021277 | -3.375972 |
| 69  | 1 | -4.071473 | -2.819154 | -2.417189 |
| 70  | 1 | -3.51822  | -2.419292 | -4.052956 |
| 71  | 7 | 2.71194   | 0.000001  | 0.000221  |
| 72  | 6 | 3.403298  | 1.193191  | 0.000209  |
| 73  | 6 | 3.403311  | -1.193182 | 0.000186  |
| 74  | 6 | 4.82206   | 1.257416  | 0.000039  |
| 75  | 6 | 4.822074  | -1.257392 | 0.000006  |
| 76  | 6 | 2.655085  | -2.398424 | 0.00032   |
| 77  | 6 | 5.423025  | -2.516131 | -0.000059 |
| 78  | 6 | 2.65506   | 2.398426  | 0.000365  |
| 79  | 6 | 5.422997  | 2.51616   | 0.000008  |
| 80  | 6 | 4.676361  | -3.69162  | 0.000063  |
| 81  | 1 | 5.182123  | -4.651364 | 0.000007  |
| 82  | 6 | 3.280831  | -3.62815  | 0.000261  |
| 83  | 1 | 2.684106  | -4.533234 | 0.000363  |
| 84  | 6 | 3.280792  | 3.628158  | 0.000339  |
| 85  | 1 | 2.684059  | 4.533237  | 0.000458  |
| 86  | 6 | 4.676322  | 3.691642  | 0.000152  |
| 87  | 1 | 5.182076  | 4.651391  | 0.000123  |
| 88  | 1 | 6.50466   | 2.591083  | -0.000134 |
| 89  | 1 | 1.572972  | 2.33978   | 0.000516  |
| 90  | 1 | 6.504688  | -2.591042 | -0.000211 |
| 91  | 1 | 1.572997  | -2.33979  | 0.000479  |
| 92  | 6 | 5.681577  | 0.000016  | -0.000153 |
| 93  | 6 | 6.579311  | 0.000039  | -1.268799 |
| 94  | 1 | 7.223333  | -0.881068 | -1.292665 |
| 95  | 1 | 5.971842  | 0.000052  | -2.176193 |
| 96  | 1 | 7.223329  | 0.88115   | -1.292639 |
| 97  | 6 | 6.579843  | 0.000002  | 1.268125  |
| 98  | 1 | 7.223882  | -0.8811   | 1.291697  |
| 99  | 1 | 7.223872  | 0.881109  | 1.291727  |
| 100 | 1 | 5.972742  | -0.000016 | 2.175764  |

---

**Table S19.** Cartesian coordinate for the optimized T<sub>1</sub> geometry of [Au(<sup>Dipp</sup>PZI)(PXZ)]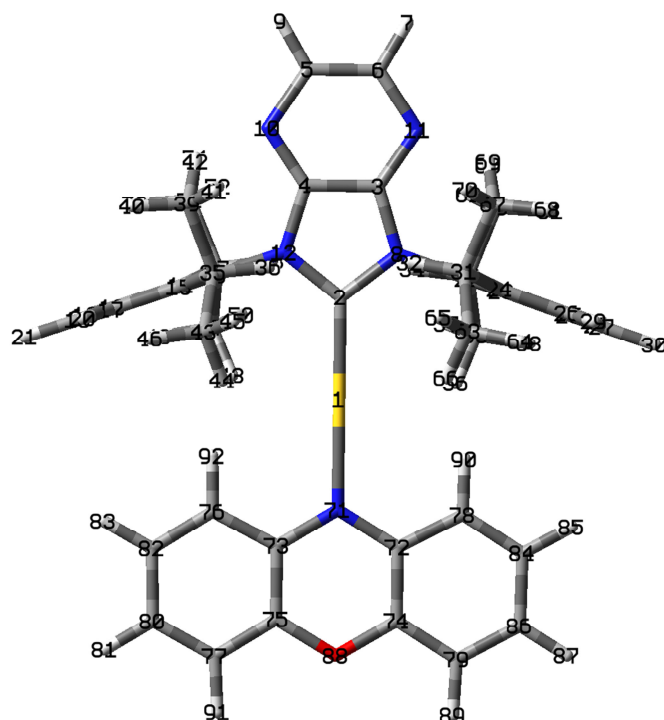

| label | atomic number | coordinates (Å) |           |           |
|-------|---------------|-----------------|-----------|-----------|
|       |               | <i>x</i>        | <i>y</i>  | <i>z</i>  |
| 1     | 79            | 0.795981        | 0.000152  | 0.000039  |
| 2     | 6             | -1.198445       | -0.000096 | -0.000038 |
| 3     | 6             | -3.367907       | 0.704614  | 0.014145  |
| 4     | 6             | -3.367686       | -0.705486 | -0.014367 |
| 5     | 6             | -5.597646       | -0.689496 | -0.013993 |
| 6     | 6             | -5.597855       | 0.687952  | 0.013645  |
| 7     | 1             | -6.536351       | 1.2334    | 0.024465  |
| 8     | 7             | -2.043098       | 1.10287   | 0.022228  |
| 9     | 1             | -6.535975       | -1.23523  | -0.024867 |
| 10    | 7             | -4.460207       | -1.459782 | -0.029442 |
| 11    | 7             | -4.460653       | 1.458581  | 0.029157  |
| 12    | 7             | -2.042755       | -1.103332 | -0.022359 |
| 13    | 6             | -1.584294       | -2.466612 | -0.050479 |
| 14    | 6             | -1.396237       | -3.094548 | -1.294998 |
| 15    | 6             | -1.354405       | -3.13048  | 1.168705  |
| 16    | 6             | -0.944972       | -4.417945 | -1.294018 |
| 17    | 6             | -0.903713       | -4.452712 | 1.113859  |
| 18    | 6             | -0.696885       | -5.0905   | -0.10373  |
| 19    | 1             | -0.798458       | -4.933156 | -2.237337 |
| 20    | 1             | -0.726349       | -4.995428 | 2.03619   |

|    |   |           |           |           |
|----|---|-----------|-----------|-----------|
| 21 | 1 | -0.355925 | -6.121453 | -0.124512 |
| 22 | 6 | -1.585107 | 2.466306  | 0.050424  |
| 23 | 6 | -1.355259 | 3.130263  | -1.168721 |
| 24 | 6 | -1.397502 | 3.094307  | 1.294969  |
| 25 | 6 | -0.905048 | 4.452652  | -1.113795 |
| 26 | 6 | -0.946732 | 4.417877  | 1.294069  |
| 27 | 6 | -0.698667 | 5.090519  | 0.103832  |
| 28 | 1 | -0.727729 | 4.995434  | -2.036097 |
| 29 | 1 | -0.800593 | 4.933138  | 2.23742   |
| 30 | 1 | -0.358083 | 6.121595  | 0.124672  |
| 31 | 6 | -1.726502 | 2.40003   | 2.610484  |
| 32 | 1 | -1.879261 | 1.340301  | 2.396849  |
| 33 | 6 | -1.644048 | 2.473069  | -2.51244  |
| 34 | 1 | -1.758324 | 1.401399  | -2.337647 |
| 35 | 6 | -1.643606 | -2.473363 | 2.512374  |
| 36 | 1 | -1.758151 | -1.401727 | 2.337548  |
| 37 | 6 | -1.725342 | -2.40037  | -2.610538 |
| 38 | 1 | -1.877926 | -1.340599 | -2.396977 |
| 39 | 6 | -2.975416 | -2.995831 | 3.084802  |
| 40 | 1 | -2.915567 | -4.065807 | 3.308221  |
| 41 | 1 | -3.226026 | -2.473988 | 4.013726  |
| 42 | 1 | -3.791757 | -2.845029 | 2.375563  |
| 43 | 6 | -0.495357 | -2.639907 | 3.520077  |
| 44 | 1 | 0.448385  | -2.26781  | 3.112636  |
| 45 | 1 | -0.711024 | -2.076468 | 4.43251   |
| 46 | 1 | -0.348714 | -3.68344  | 3.813977  |
| 47 | 6 | -0.580771 | -2.490125 | -3.632331 |
| 48 | 1 | 0.348946  | -2.08688  | -3.222504 |
| 49 | 1 | -0.390562 | -3.518858 | -3.952081 |
| 50 | 1 | -0.829575 | -1.914712 | -4.528858 |
| 51 | 6 | -3.043927 | -2.948885 | -3.188626 |
| 52 | 1 | -3.321136 | -2.404437 | -4.09672  |
| 53 | 1 | -2.951498 | -4.007971 | -3.449513 |
| 54 | 1 | -3.85676  | -2.848162 | -2.46665  |
| 55 | 6 | -0.49567  | 2.639942  | -3.519944 |
| 56 | 1 | 0.448102  | 2.268109  | -3.112332 |
| 57 | 1 | -0.711015 | 2.076442  | -4.432414 |
| 58 | 1 | -0.349268 | 3.683518  | -3.813812 |
| 59 | 6 | -2.97591  | 2.995165  | -3.08508  |
| 60 | 1 | -3.792326 | 2.84411   | -2.375979 |
| 61 | 1 | -2.916339 | 4.065165  | -3.308457 |
| 62 | 1 | -3.226224 | 2.473278  | -4.014059 |
| 63 | 6 | -0.581694 | 2.489549  | 3.632042  |
| 64 | 1 | -0.391153 | 3.518259  | 3.951669  |
| 65 | 1 | -0.830437 | 1.914243  | 4.528656  |

|    |   |           |           |           |
|----|---|-----------|-----------|-----------|
| 66 | 1 | 0.347824  | 2.086051  | 3.222015  |
| 67 | 6 | -3.044923 | 2.948607  | 3.188862  |
| 68 | 1 | -2.952401 | 4.00766   | 3.449853  |
| 69 | 1 | -3.857883 | 2.847997  | 2.467011  |
| 70 | 1 | -3.322022 | 2.404086  | 4.096946  |
| 71 | 7 | 2.932485  | 0.000314  | 0.000055  |
| 72 | 6 | 3.646089  | 1.174848  | -0.048965 |
| 73 | 6 | 3.646258  | -1.174125 | 0.049078  |
| 74 | 6 | 5.062489  | 1.172361  | -0.047985 |
| 75 | 6 | 5.062657  | -1.171434 | 0.048105  |
| 76 | 6 | 2.997312  | -2.429056 | 0.102462  |
| 77 | 6 | 5.798538  | -2.349508 | 0.096048  |
| 78 | 6 | 2.996957  | 2.429685  | -0.102348 |
| 79 | 6 | 5.798195  | 2.350547  | -0.095931 |
| 80 | 6 | 5.130839  | -3.565627 | 0.146859  |
| 81 | 1 | 5.698598  | -4.488513 | 0.184366  |
| 82 | 6 | 3.728426  | -3.599975 | 0.150171  |
| 83 | 1 | 3.207552  | -4.54964  | 0.190415  |
| 84 | 6 | 3.727897  | 3.60071   | -0.150057 |
| 85 | 1 | 3.206888  | 4.550301  | -0.1903   |
| 86 | 6 | 5.130318  | 3.566566  | -0.146746 |
| 87 | 1 | 5.697941  | 4.489535  | -0.184251 |
| 88 | 1 | 5.760419  | 0.000516  | 0.000072  |
| 89 | 1 | 6.880132  | 2.289061  | -0.092619 |
| 90 | 1 | 1.913325  | 2.452908  | -0.105856 |
| 91 | 1 | 6.880465  | -2.28786  | 0.092741  |
| 92 | 6 | 1.913685  | -2.452455 | 0.105975  |

---

**Table S20.** Summary of the TD-CAM-B3LYP calculation results for the T<sub>1</sub> geometry of [Au(DippPZI)(ACD)]

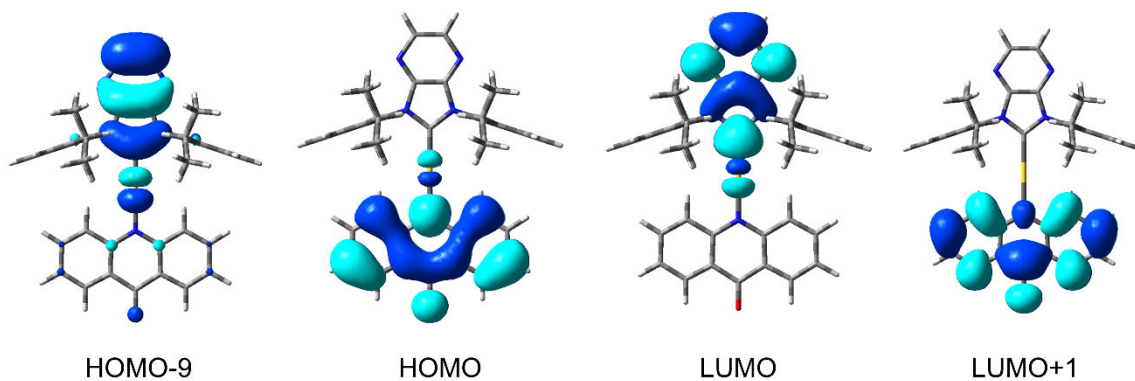

| state          | energy (eV) | participating molecular orbitals (expansion coefficient) | transition character         |
|----------------|-------------|----------------------------------------------------------|------------------------------|
| T <sub>1</sub> | 2.49        | HOMO → LUMO+1 (0.94)                                     | $\pi-\pi^*_{ACD}$            |
| T <sub>2</sub> | 3.08        | HOMO-9 → LUMO (0.56)<br>HOMO → LUMO (0.34)               | $\pi-\pi^*_{DippPZI} + LLCT$ |
| T <sub>3</sub> | 3.19        | HOMO → LUMO+1 (0.42)                                     | $\pi-\pi^*_{ACD}$            |
| T <sub>4</sub> | 3.33        | HOMO-9 → LUMO (0.26)<br>HOMO → LUMO (0.21)               | $\pi-\pi^*_{DippPZI} + LLCT$ |
| S <sub>1</sub> | 3.38        | HOMO → LUMO (0.91)                                       | LLCT                         |

**Table S21.** Summary of the TD-CAM-B3LYP calculation results for the T<sub>1</sub> geometry of [Au(<sup>Dipp</sup>PZI)(Cz)]

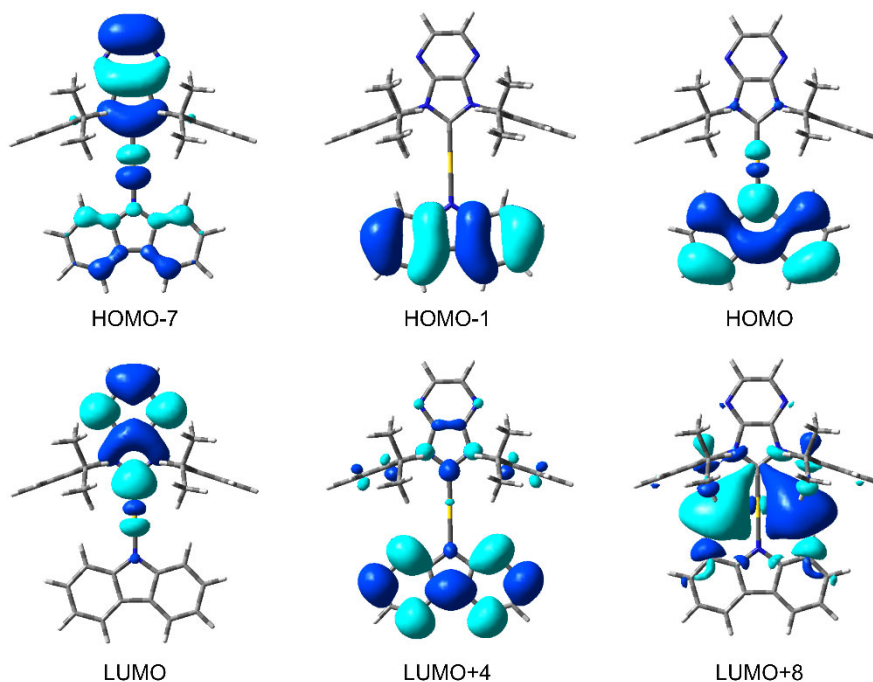

| state          | energy (eV) | participating molecular orbitals (expansion coefficient) | transition character             |
|----------------|-------------|----------------------------------------------------------|----------------------------------|
| T <sub>1</sub> | 2.94        | HOMO → LUMO (0.47)<br>HOMO-7 → LUMO (0.34)               | $\pi-\pi^*$ <sub>DippPZI</sub>   |
| T <sub>2</sub> | 3.10        | HOMO → LUMO+4 (0.59)                                     | $\pi-\pi^*$ <sub>Cz</sub>        |
| T <sub>3</sub> | 3.13        | HOMO-1 → LUMO+4 (0.40)<br>HOMO → LUMO+8 (0.31)           | $\pi-\pi^*$ <sub>Cz</sub> + LMCT |
| S <sub>1</sub> | 3.23        | HOMO → LUMO (0.91)                                       | LLCT                             |

**Table S22.** Summary of the TD-CAM-B3LYP calculation results for the  $T_1$  geometry of  $[\text{Au}(\text{DippPZI})(\text{DPA})]$

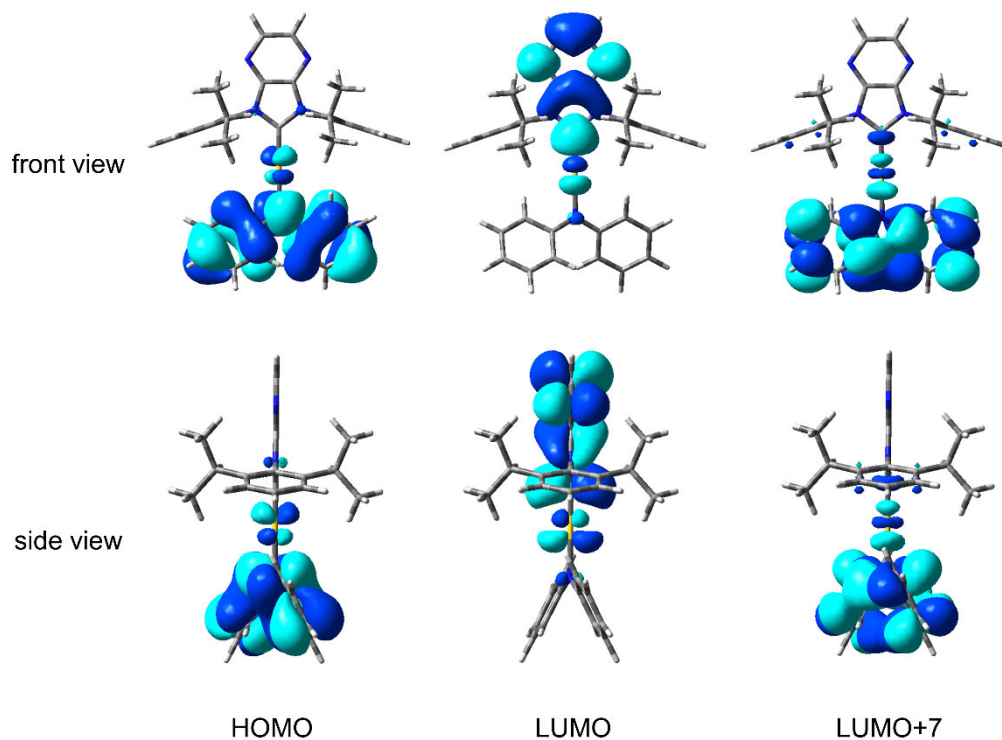

| state | energy (eV) | participating molecular orbitals (expansion coefficient) | transition character     |
|-------|-------------|----------------------------------------------------------|--------------------------|
| $T_1$ | 2.64        | HOMO $\rightarrow$ LUMO (0.83)                           | LLCT                     |
| $S_1$ | 2.78        | HOMO $\rightarrow$ LUMO (0.92)                           | LLCT                     |
| $T_2$ | 2.84        | HOMO $\rightarrow$ LUMO+7 (0.62)                         | $\pi-\pi^*_{\text{DPA}}$ |



**Table S23.** Summary of the TD-CAM-B3LYP calculation results for the  $T_1$  geometry of  $[\text{Au}(\text{DippPZI})(\text{DPAC})]$

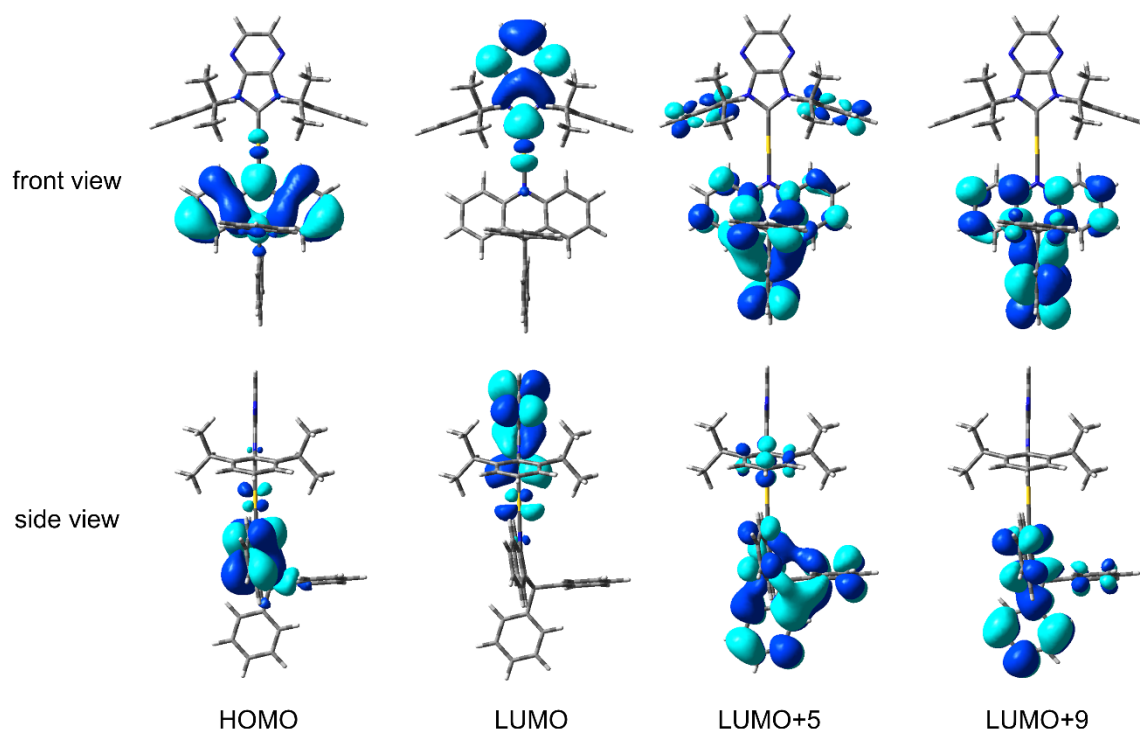

| state | energy (eV) | participating molecular orbitals (expansion coefficient)             | transition character        |
|-------|-------------|----------------------------------------------------------------------|-----------------------------|
| $T_1$ | 2.65        | HOMO $\rightarrow$ LUMO (0.80)                                       | LLCT                        |
| $S_1$ | 2.79        | HOMO $\rightarrow$ LUMO (0.91)                                       | LLCT                        |
| $T_2$ | 2.93        | HOMO $\rightarrow$ LUMO+5 (0.22)<br>HOMO $\rightarrow$ LUMO+9 (0.22) | $\pi-\pi^*$ <sub>DPAC</sub> |

**Table S24.** Summary of the TD-CAM-B3LYP calculation results for the  $T_1$  geometry of  $[\text{Au}(\text{DippPZI})(\text{DMAC})]$

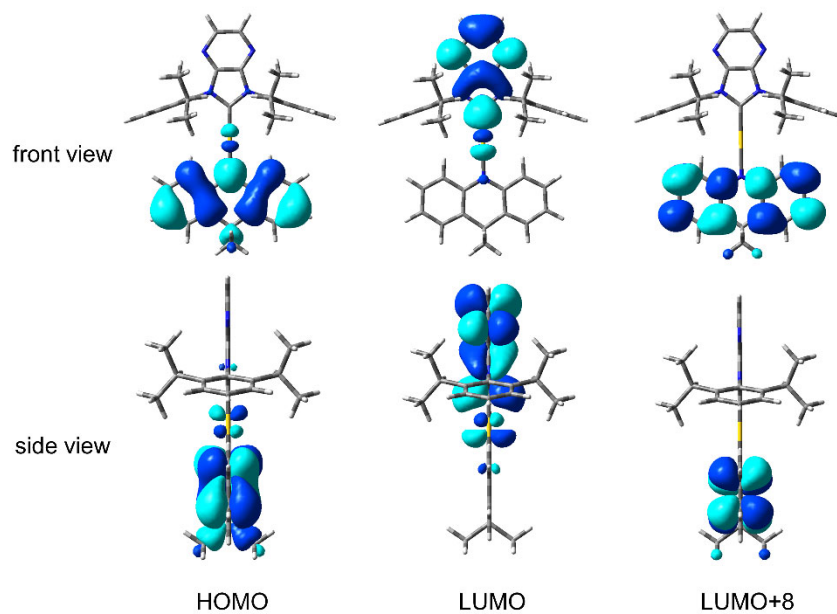

| state | energy (eV) | participating molecular orbitals (expansion coefficient) | transition character            |
|-------|-------------|----------------------------------------------------------|---------------------------------|
| $T_1$ | 2.50        | HOMO $\rightarrow$ LUMO (0.84)                           | LLCT                            |
| $S_1$ | 2.63        | HOMO $\rightarrow$ LUMO (0.91)                           | LLCT                            |
| $T_2$ | 2.87        | HOMO $\rightarrow$ LUMO+8 (0.78)                         | $\pi$ - $\pi^*$ <sub>DMAC</sub> |

**Table S25.** Summary of the TD-CAM-B3LYP calculation results for the  $T_1$  geometry of  $[\text{Au}(\text{DippPZI})(\text{PXZ})]$

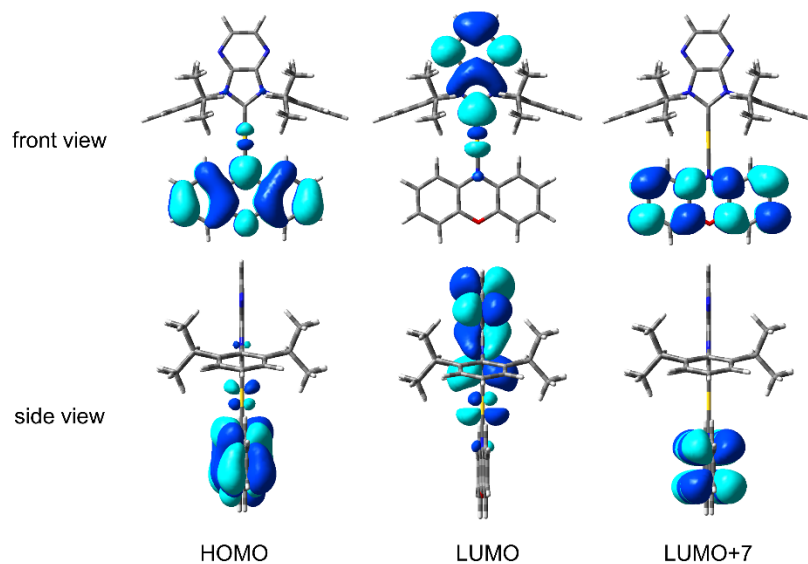

| state | energy (eV) | participating molecular orbitals (expansion coefficient) | transition character       |
|-------|-------------|----------------------------------------------------------|----------------------------|
| $T_1$ | 2.27        | HOMO $\rightarrow$ LUMO (0.87)                           | LLCT                       |
| $S_1$ | 2.40        | HOMO $\rightarrow$ LUMO (0.92)                           | LLCT                       |
| $T_2$ | 2.41        | HOMO $\rightarrow$ LUMO+7 (0.78)                         | $\pi-\pi^*$ <sub>PXZ</sub> |

**Table S26.**  $S_r(r)$  values calculated for the fragments in Au(I) complexes<sup>a</sup>

|                           | [Au( <sup>Dipp</sup> PZI)(ACD)] | [Au( <sup>Dipp</sup> PZI)(Cz)] | [Au( <sup>Dipp</sup> PZI)(DPA)] | [Au( <sup>Dipp</sup> PZI)(DPAC)] | [Au( <sup>Dipp</sup> PZI)(DMAC)] | [Au( <sup>Dipp</sup> PZI)(PXZ)] |
|---------------------------|---------------------------------|--------------------------------|---------------------------------|----------------------------------|----------------------------------|---------------------------------|
| $S_{r,\text{carbene}}(r)$ | 0.10                            | 0.10                           | 0.09                            | 0.09                             | 0.09                             | 0.10                            |
| $S_{r,\text{Au}}(r)$      | 0.06                            | 0.06                           | 0.05                            | 0.05                             | 0.05                             | 0.05                            |
| $S_{r,\text{amido}}(r)$   | 0.16                            | 0.14                           | 0.12                            | 0.15                             | 0.15                             | 0.16                            |

<sup>a</sup>Fragmental  $S_r(r)$  values were calculated for the carbene ligand ( $S_{r,\text{carbene}}(r)$ ), Au(I) ( $S_{r,\text{Au}}(r)$ ), and the amido ligand ( $S_{r,\text{amido}}(r)$ ).

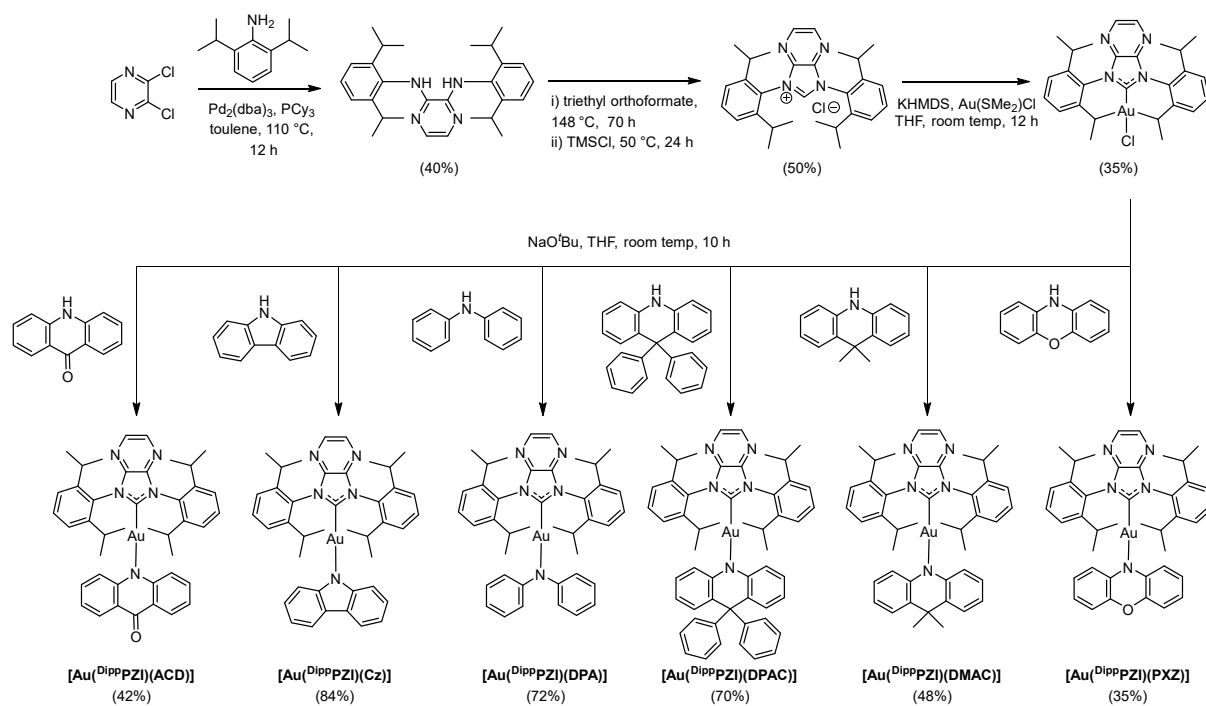

Scheme S1. Syntheses of the Au(I) complexes.

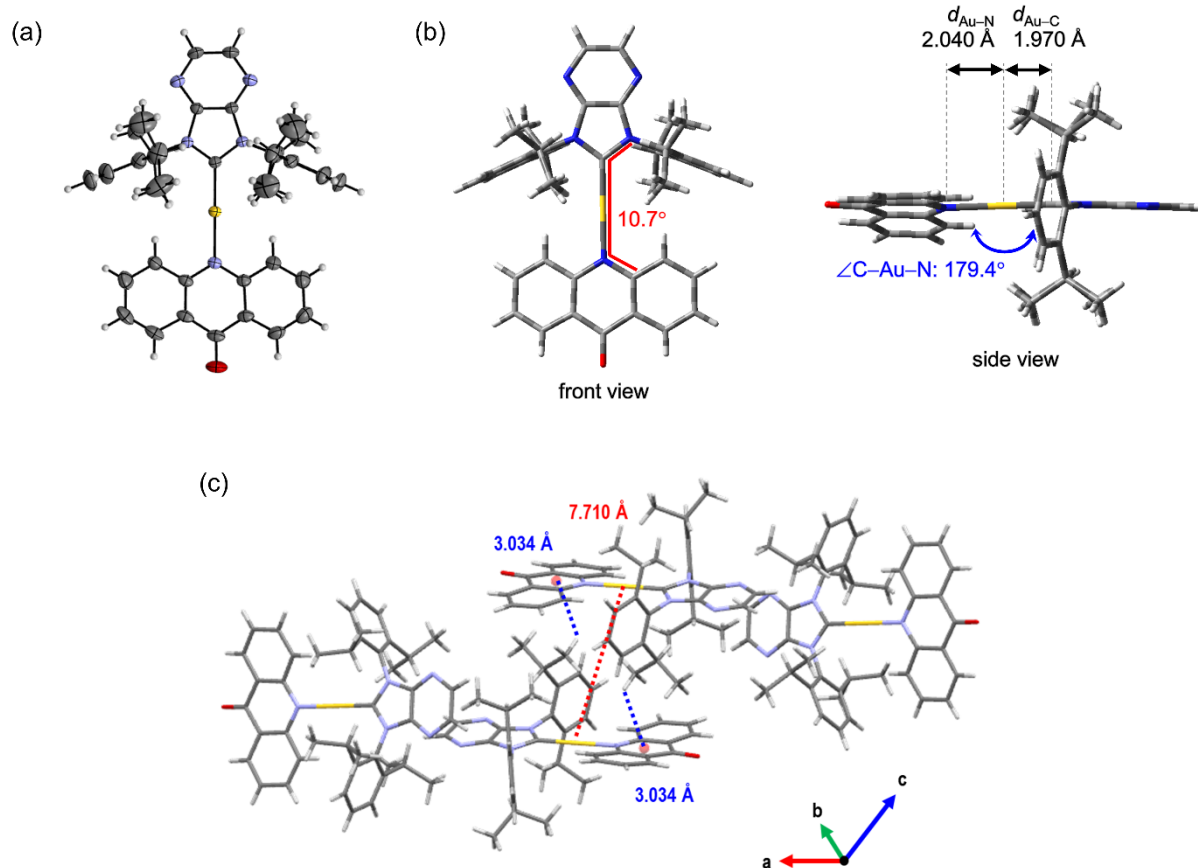

**Figure S1.** Single crystal X-ray structure of  $[\text{Au}^{\text{DippPZI}}(\text{ACD})]$ . (a) Oak Ridge Thermal Ellipsoid Plot (ORTEP) drawing at the 50% probability level. (b) Geometric parameters. See the main text for the definitions of the symbols. (c) Crystallographic packing diagram showing the intermolecular C-H... $\pi$  bonding interaction (blue dotted line) and the Au...Au distance (red dotted line).

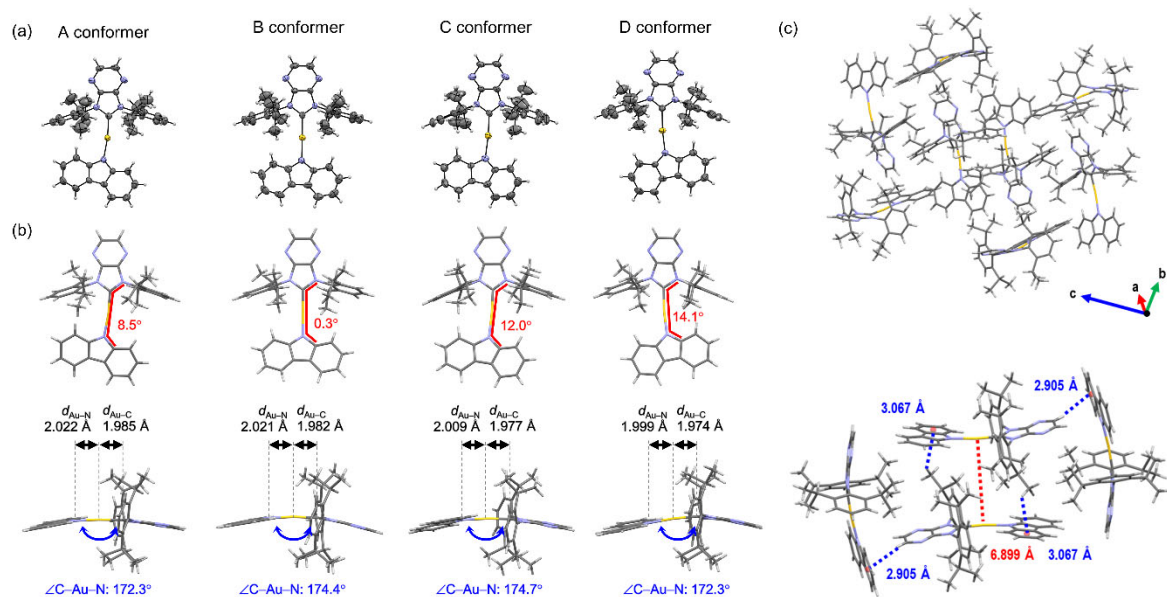

**Figure S2.** Single crystal X-ray structures of four conformers of  $[\text{Au}^{\text{(DippPZI)}}(\text{Cz})]$ . (a) ORTEP drawing at the 50% probability level. (b) Geometric parameters. See the main text for the definitions of the symbols. (c) Crystallographic packing diagram showing the intermolecular C–H $\cdots$  $\pi$  bonding interaction (blue dotted line) and the Au $\cdots$ Au distance (red dotted line).

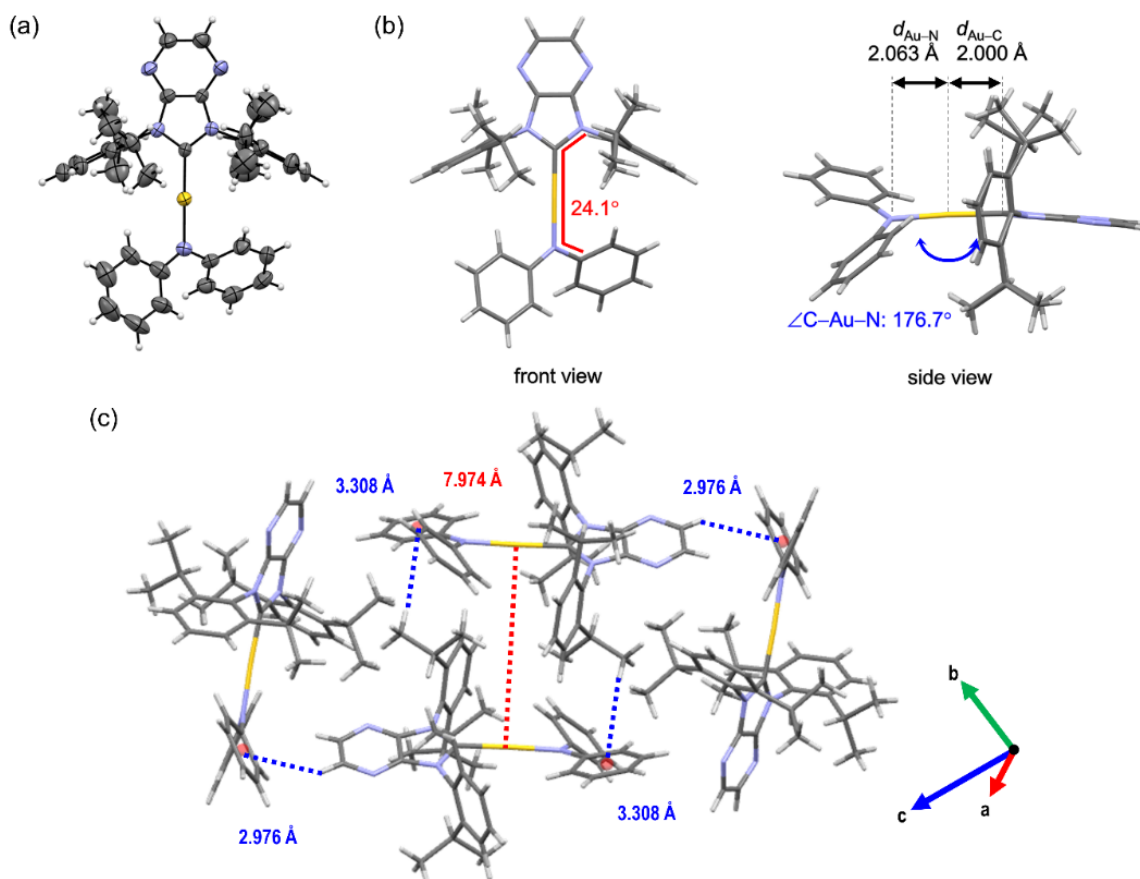

**Figure S3.** Single crystal X-ray structure of  $[\text{Au}(\text{DiPPPI})(\text{DPA})]$ . (a) ORTEP drawing at the 50% probability level. (b) Geometric parameters. See the main text for the definitions of the symbols. (c) Crystallographic packing diagram showing the intermolecular C-H $\cdots$  $\pi$  bonding interaction (blue dotted line) and the Au $\cdots$ Au distance (red dotted line).



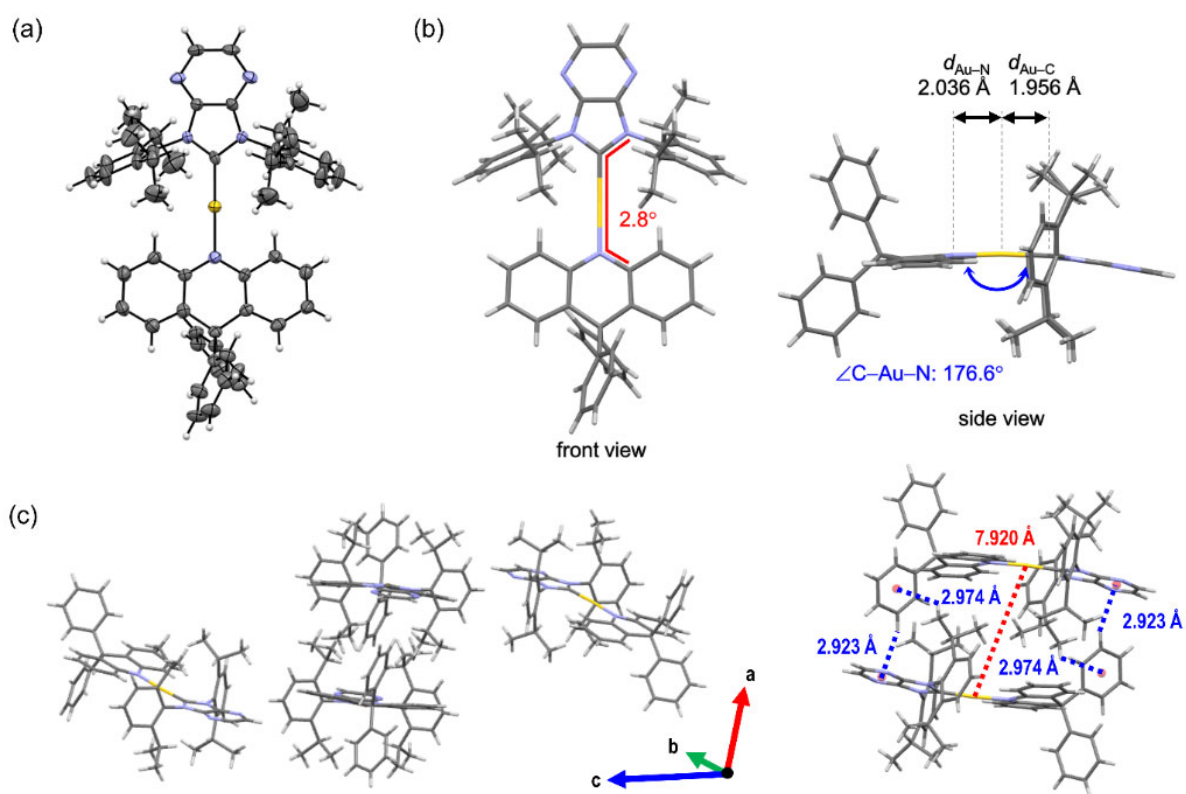

**Figure S4.** Single crystal X-ray structure of [Au(DiPPZl)(DPAC)]. (a) ORTEP drawing at the 50% probability level. (b) Geometric parameters. See the main text for the definitions of the symbols. (c) Crystallographic packing diagram showing the intermolecular C-H $\cdots$  $\pi$  bonding interaction (blue dotted line) and the Au $\cdots$ Au distance (red dotted line).

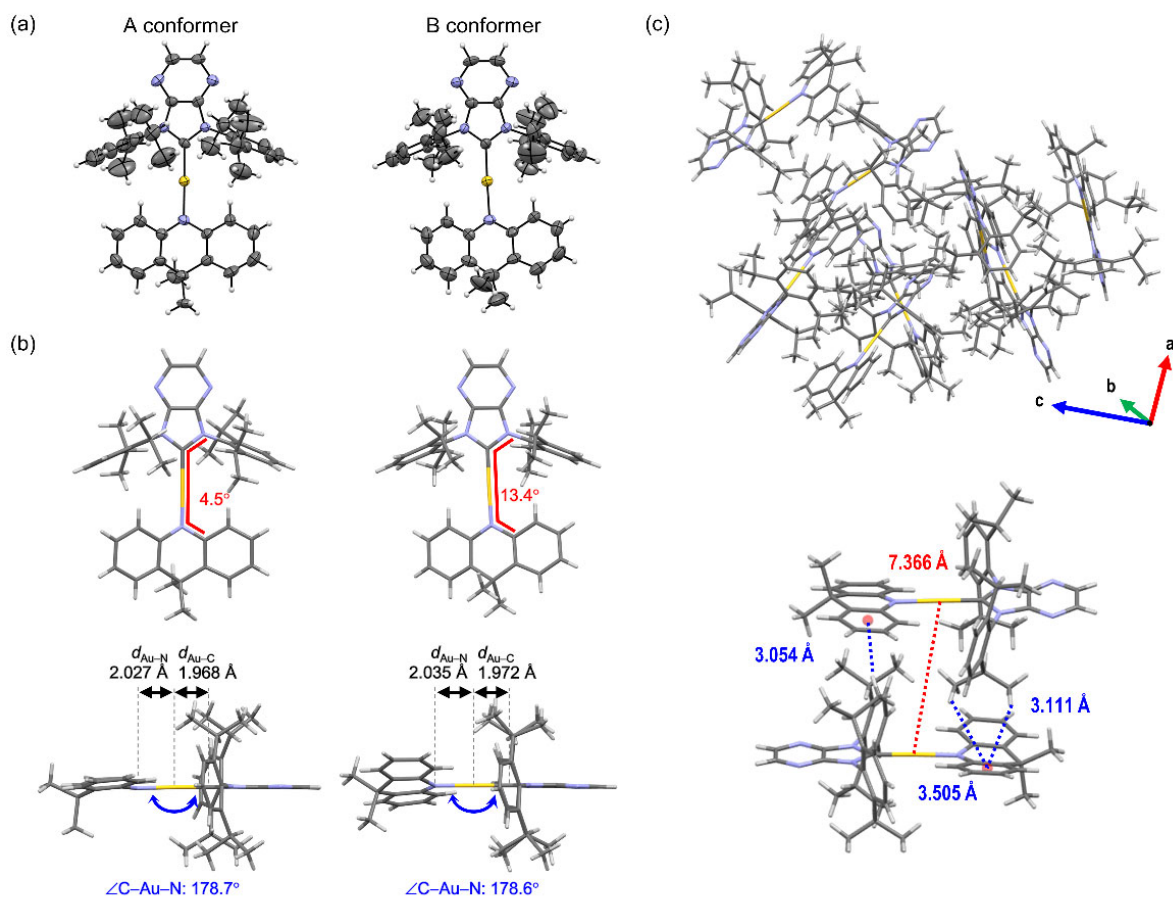

**Figure S5.** Single crystal X-ray structures of two conformers of  $[\text{Au}(\text{DippPZI})(\text{DMAC})]$ . (a) ORTEP drawing at the 50% probability level. (b) Geometric parameters. See the main text for the definitions of the symbols. (c) Crystallographic packing diagram showing the intermolecular  $\text{C-H}\cdots\pi$  bonding interaction (blue dotted line) and the  $\text{Au}\cdots\text{Au}$  distance (red dotted line).

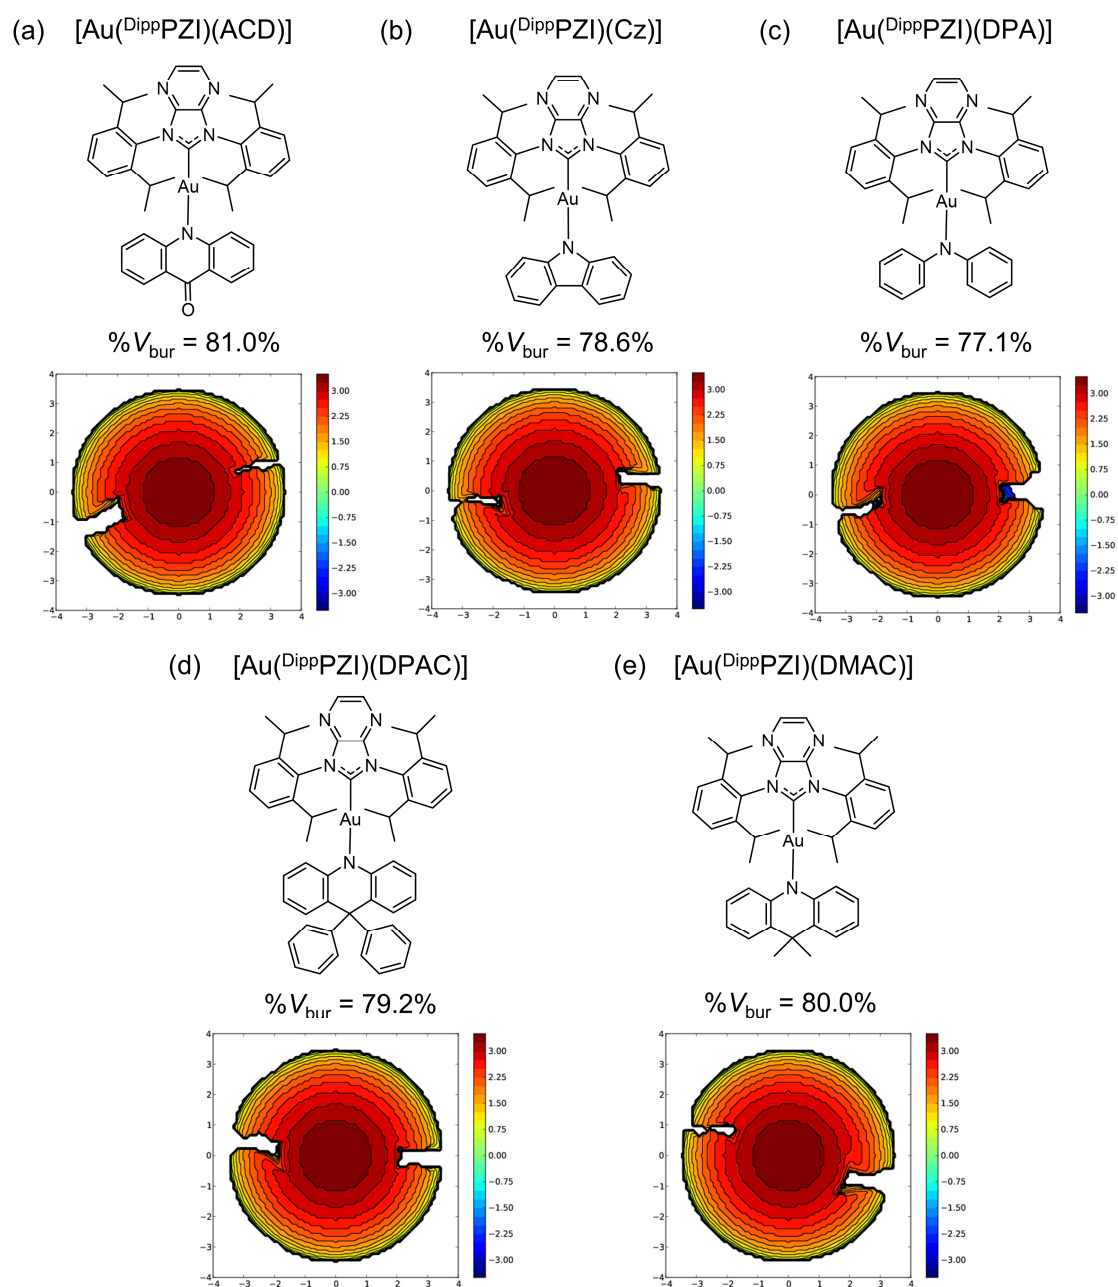

**Figure S6.** Calculated percent buried volumes ( $\%V_{\text{bur}}$ ) and steric maps of the Au(I) complexes (sphere radius = 3.5 Å, Bondi radii scaled by 1.17).

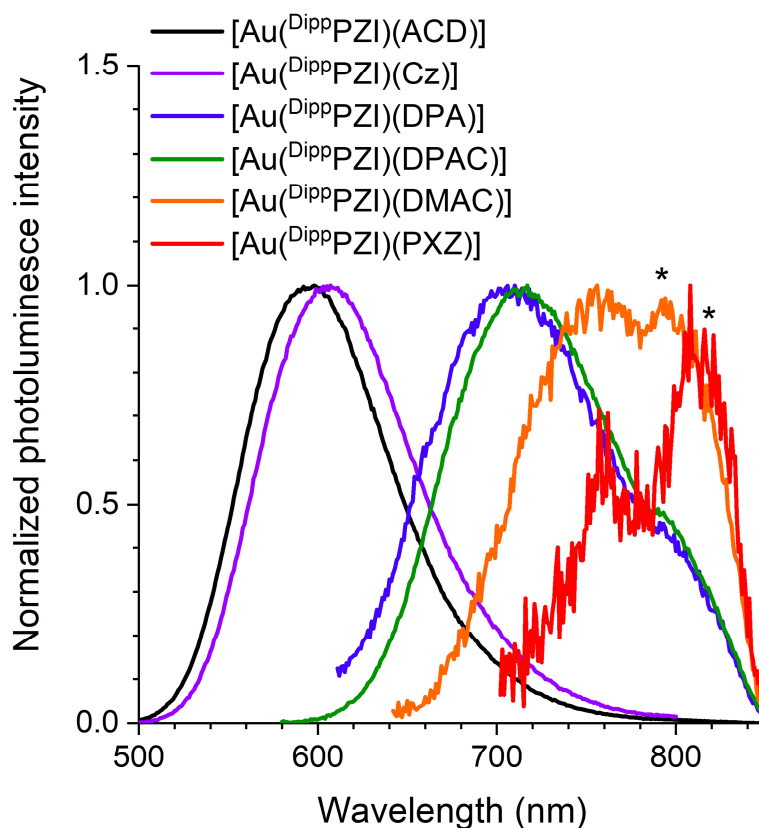

**Figure S7.** Normalized photoluminescence spectra of 10  $\mu$ M Au(I) complex in toluene: photoexcitation wavelength ( $\lambda_{ex}$ ) = [Au(<sup>Dipp</sup>PZI)(ACD)], 462 nm; [Au(<sup>Dipp</sup>PZI)(Cz)], 475 nm; [Au(<sup>Dipp</sup>PZI)(DPA)], 549 nm; [Au(<sup>Dipp</sup>PZI)(DPAC)], 560 nm; [Au(<sup>Dipp</sup>PZI)(DMAC)], 590 nm; [Au(<sup>Dipp</sup>PZI)(PXZ)], 619 nm. Peaks marked with an aesterisk (\*) at wavelengths of 795 and 824 nm are due to instrumental drifts.

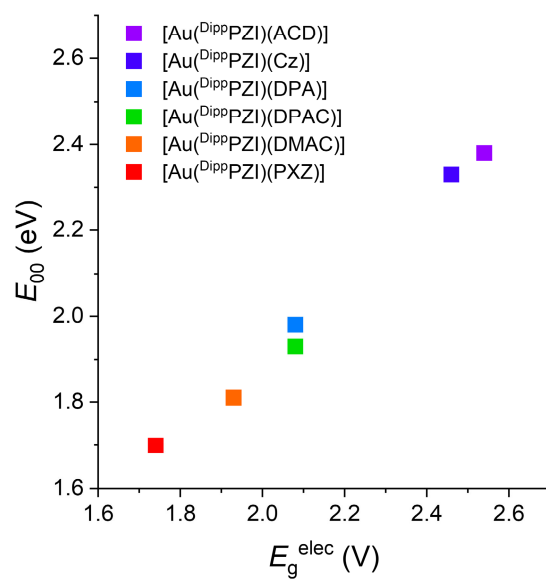

**Figure S8.** Correlation between  $E_{00}$  and the electrochemical bandgap energy ( $E_g^{\text{elec}}$ ) of Au(I) complexes.

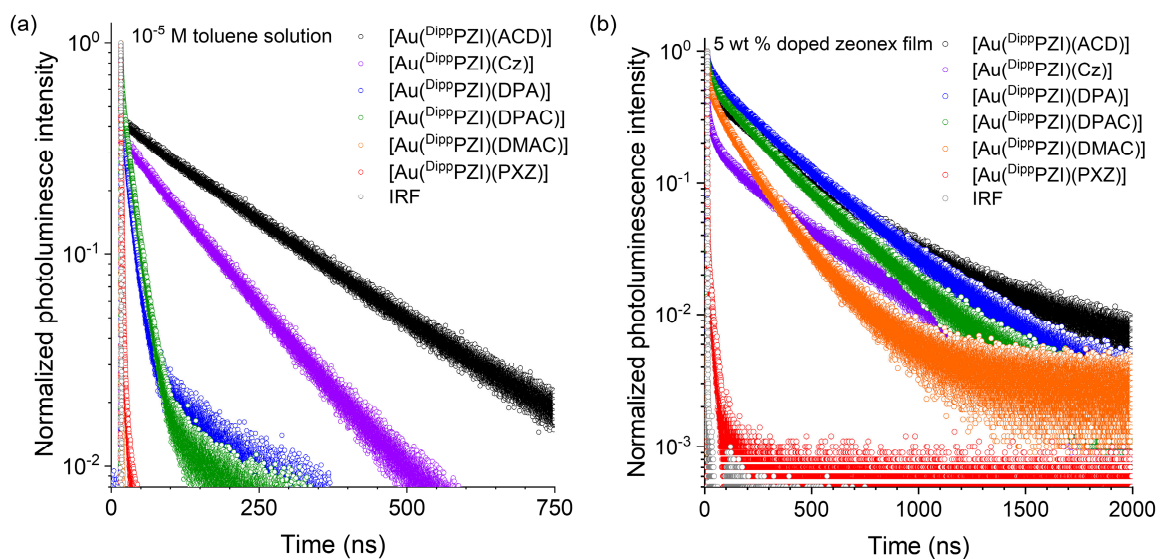

**Figure S9.** Photoluminescence decay traces of (a)  $10 \mu\text{M}$  Au(I) complexes in deaerated toluene and (b) Zeonex films doped with 5 wt % Au(I) complexes, recorded after 377 nm pulsed laser excitation (time resolution: 16 ps for solutions and 32 ps for polymer films). Photoluminescence decay traces were collected at peak emission wavelengths. Instrumental response functions (IRF) were determined at a wavelength of 377 nm.

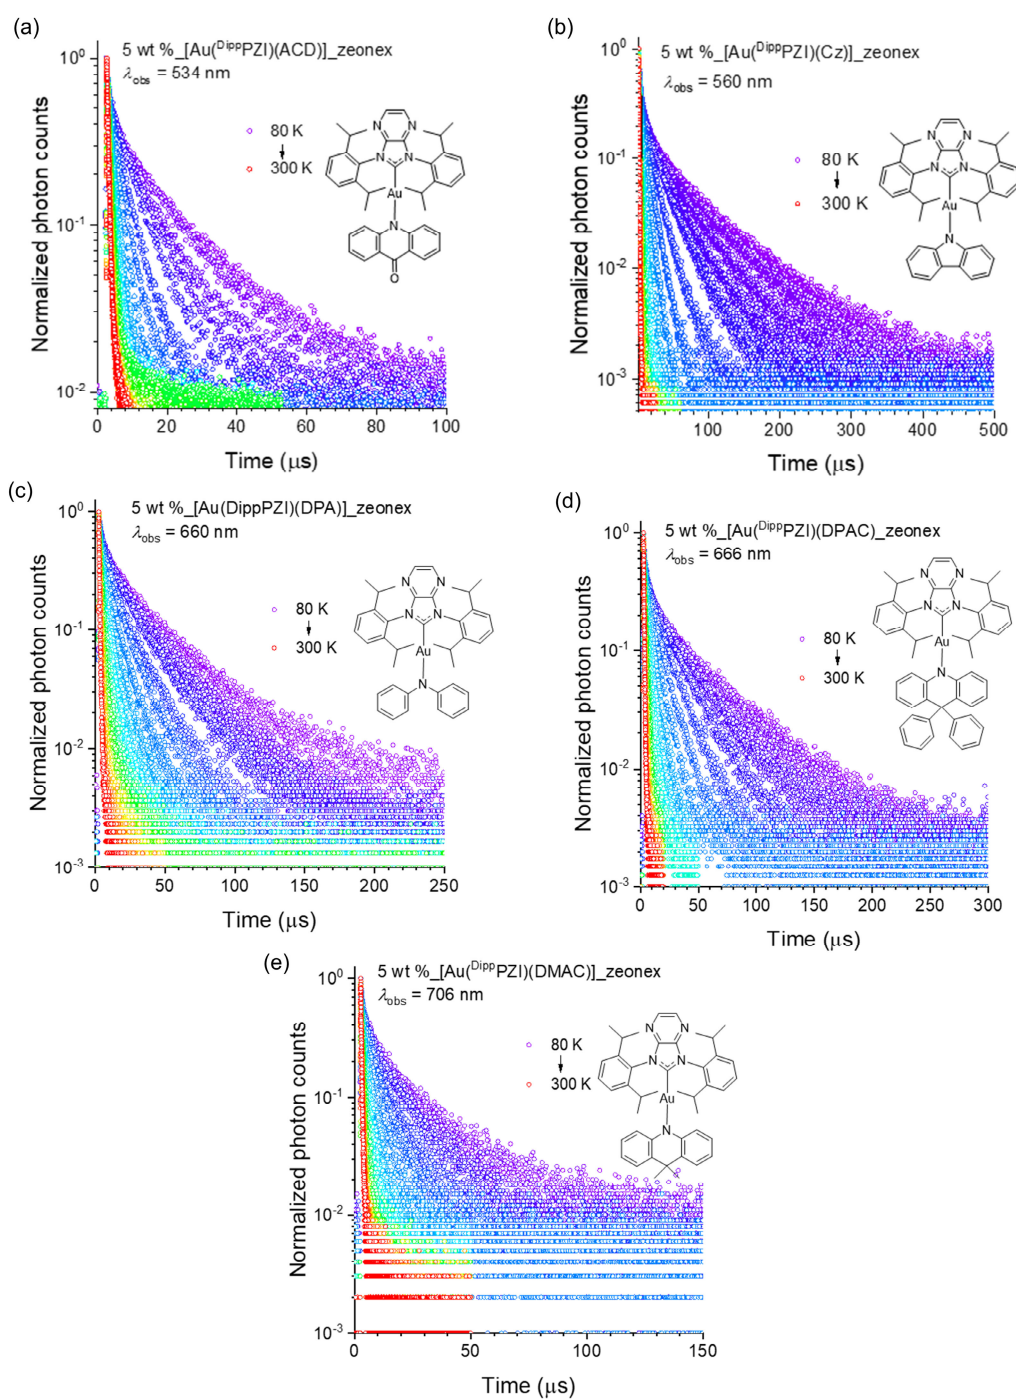

**Figure S10.** Variable-temperature (80–300 K) photoluminescence decay traces of Zeonex films doped with 5 wt % Au(I) complexes: (a)  $[\text{Au}(\text{DippPZI})(\text{ACD})]$  (observation wavelength ( $\lambda_{\text{obs}}$ ) = 534 nm), (b)  $[\text{Au}(\text{DippPZI})(\text{Cz})]$  ( $\lambda_{\text{obs}}$  = 560 nm), (c)  $[\text{Au}(\text{DippPZI})(\text{DPA})]$  ( $\lambda_{\text{obs}}$  = 660 nm), (d)  $[\text{Au}(\text{DippPZI})(\text{DPAC})]$  ( $\lambda_{\text{obs}}$  = 666 nm), and (e)  $[\text{Au}(\text{DippPZI})(\text{DMAC})]$  ( $\lambda_{\text{obs}}$  = 706 nm). The photoluminescence decay curves were fitted to a triexponential decay model to return a weighted average lifetime ( $\tau_{\text{obs}}$ ).

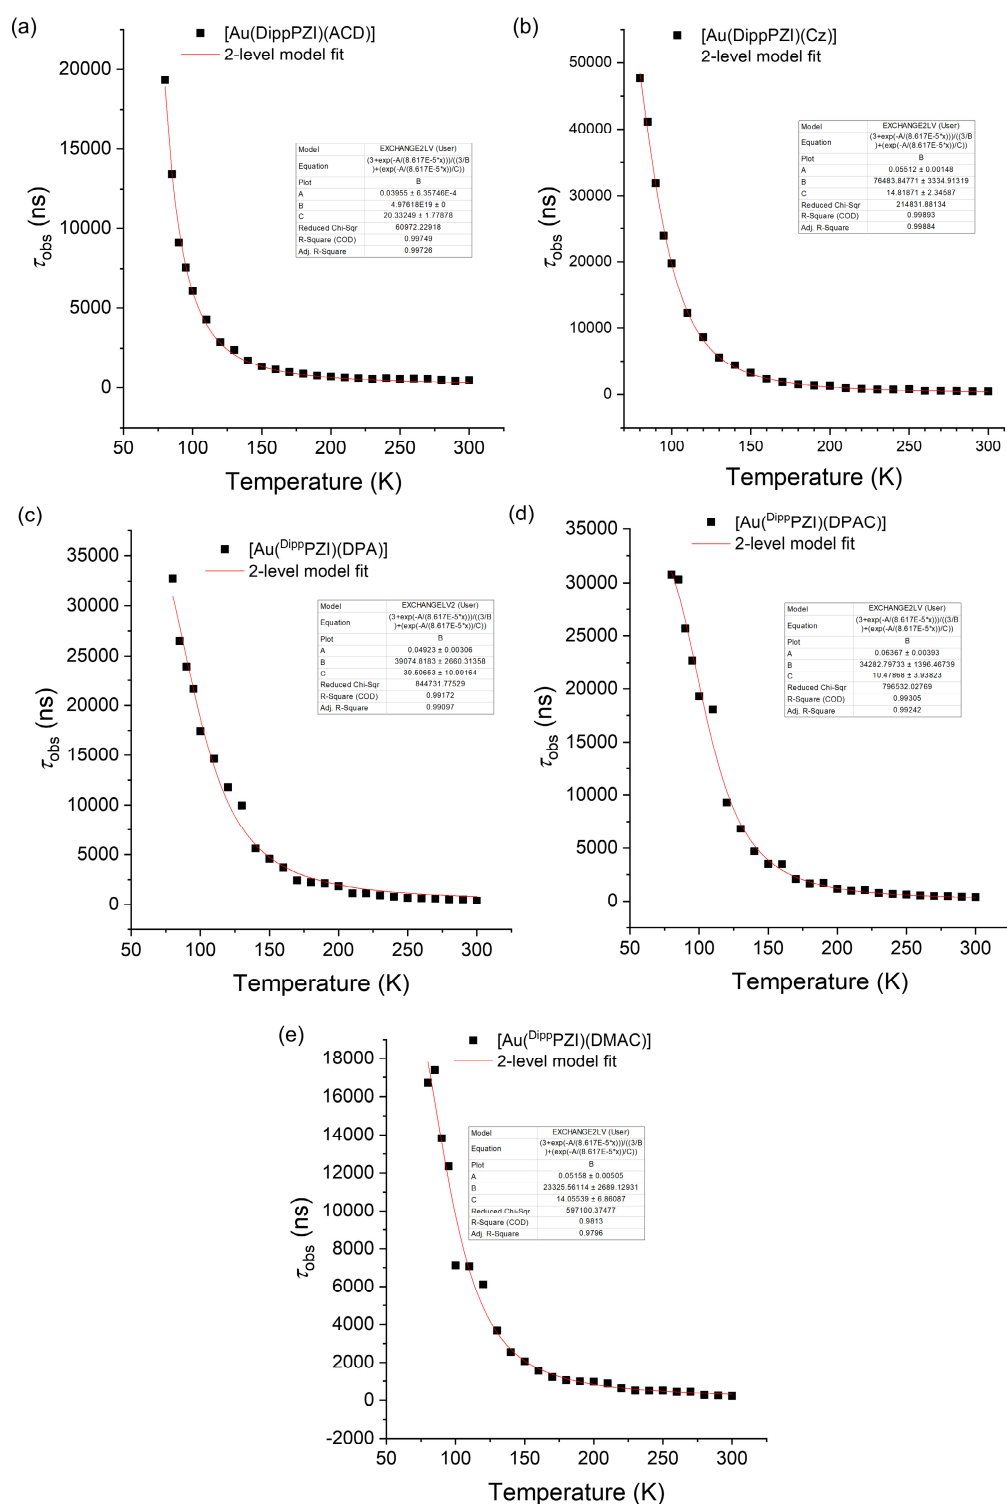

**Figure S11.** Photoluminescence lifetime ( $\tau_{\text{obs}}$ ) of Zeonex films doped with 5 wt % Au(I) complexes as a function of temperature: (a)  $[\text{Au}(\text{DippPZI})(\text{ACD})]$ , (b)  $[\text{Au}(\text{DippPZI})(\text{Cz})]$ , (c)  $[\text{Au}(\text{DippPZI})(\text{DPA})]$ , (d)  $[\text{Au}(\text{DippPZI})(\text{DPAC})]$ , and (e)  $[\text{Au}(\text{DippPZI})(\text{DMAC})]$ . Red curves are nonlinear least-squares fits of the data to eq S1.



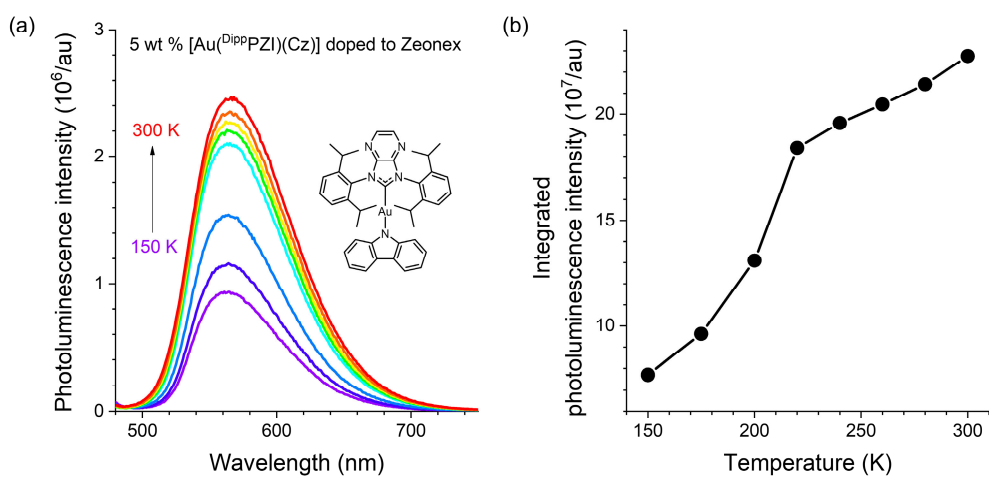

**Figure S12.** Photoluminescence spectra of Zeonex film doped with 5 wt % [Au(DiPPZl)(Cz)] at various temperature (150 to 300 K) and integrated photoluminescence intensities as a function of temperature.

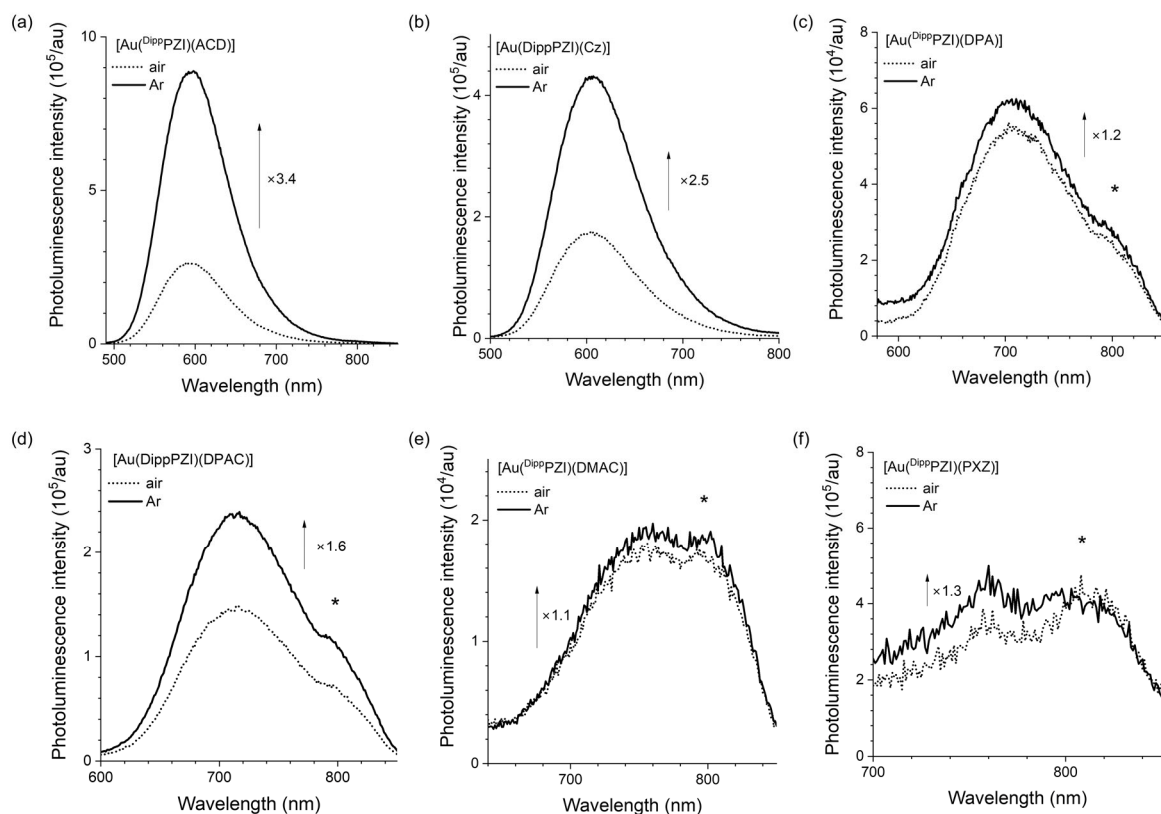

**Figure S13.** Photoluminescence spectra of the Au(I) complexes (10  $\mu$ M in toluene) obtained before (dotted line) and after (solid line) deaeration: (a) [Au(<sup>D</sup>iPPZl)(ACD)], (b) [Au(<sup>D</sup>iPPZl)(Cz)], (c) [Au(<sup>D</sup>iPPZl)(DPA)], (d) [Au(<sup>D</sup>iPPZl)(DPAC)], (e) [Au(<sup>D</sup>iPPZl)(DMAC)], and (f) [Au(<sup>D</sup>iPPZl)(PXZ)]. Peaks marked with an asterisk (\*) at wavelengths of 810 nm are due to instrumental drifts.

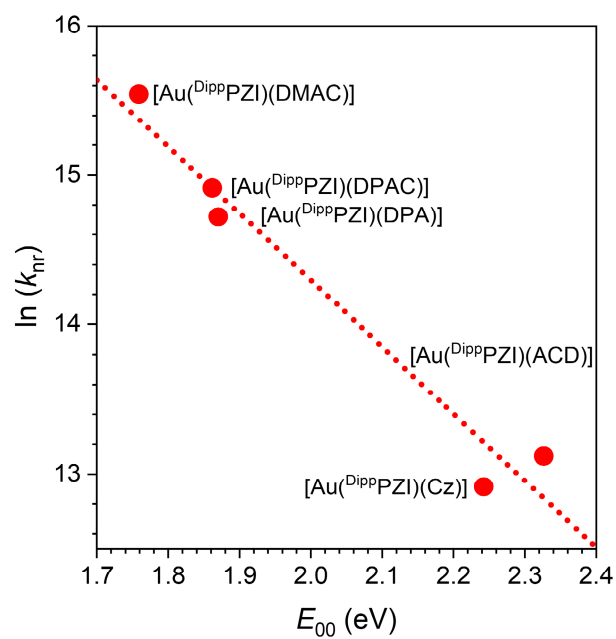

**Figure S14.** Plot of logarithm of  $k_{nr}$  as a function of  $E_{00}$  for Au(I) complexes. See Table 1 for the values of  $k_{nr}$  and  $E_{00}$ . The red dotted line is a visual guidance to the energy gap law of eq 1 in the main text.

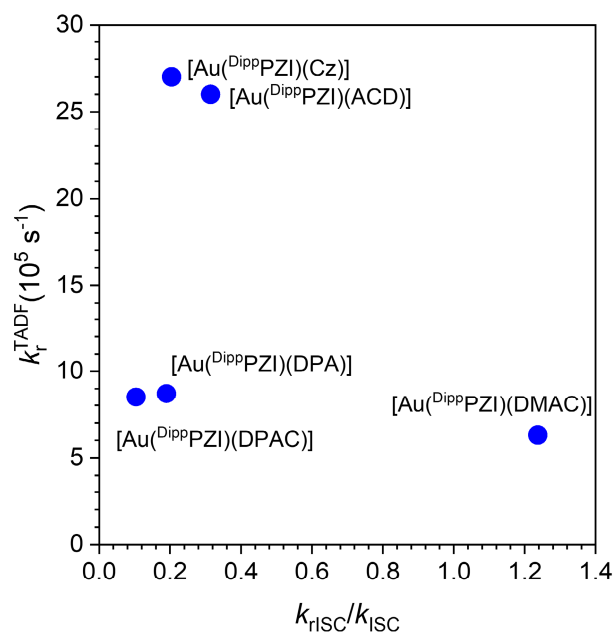

**Figure S15.** Plot of  $k_r^{TADF}$  as a function of the ratio  $k_{rISC}/k_{ISC}$  for Au(I) complexes. See Table 1 for the values of  $k_r^{TADF}$ ,  $k_{rISC}$  and  $k_{ISC}$ .

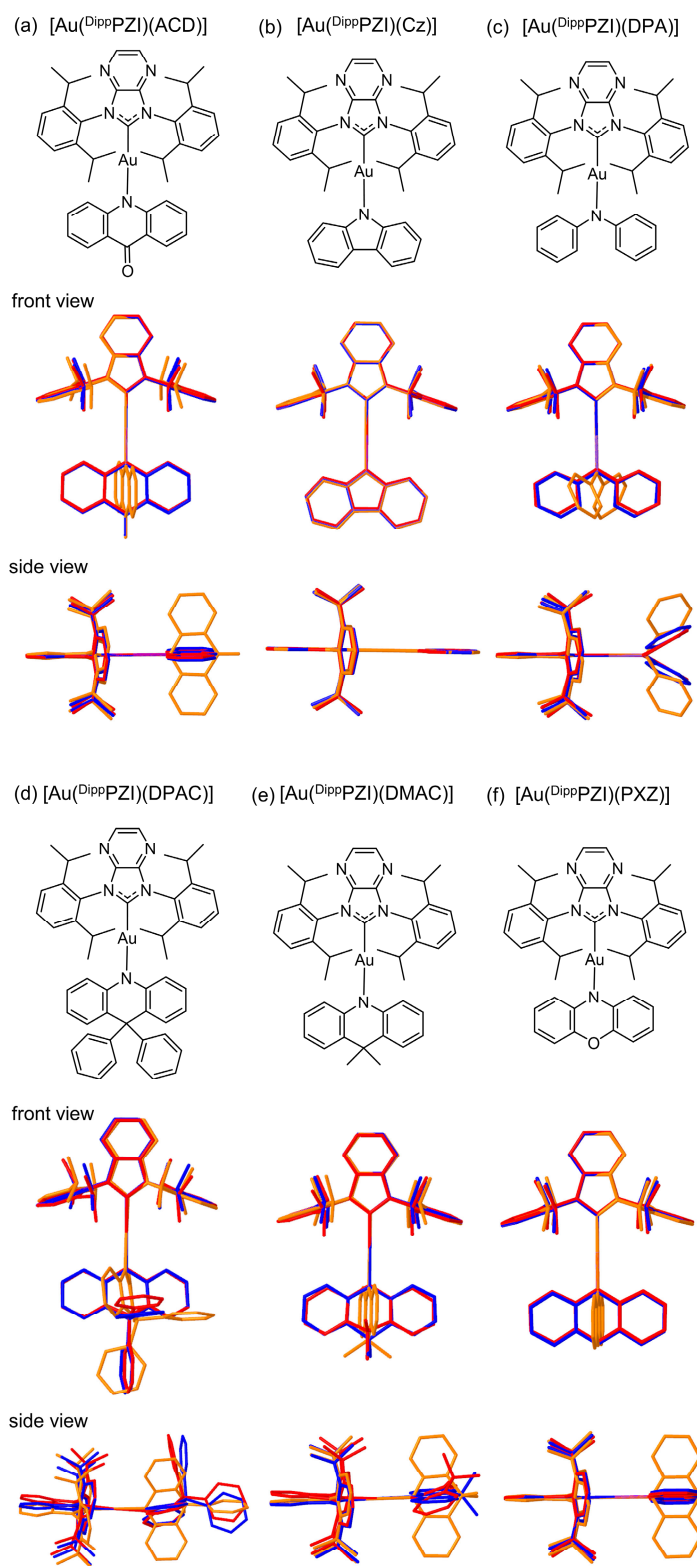

**Figure S16.** Overlays of the optimized geometries of the  $S_0$  (red),  $S_1$  (orange), and  $T_1$  (blue) states of (a)  $[\text{Au}^{\text{DippPZI}}(\text{ACD})]$ , (b)  $[\text{Au}^{\text{DippPZI}}(\text{Cz})]$ , (c)  $[\text{Au}^{\text{DippPZI}}(\text{DPA})]$ , (d)  $[\text{Au}^{\text{DippPZI}}(\text{DPAC})]$ , (e)  $[\text{Au}^{\text{DippPZI}}(\text{DMAC})]$ , and (f)  $[\text{Au}^{\text{DippPZI}}(\text{PXZ})]$ .

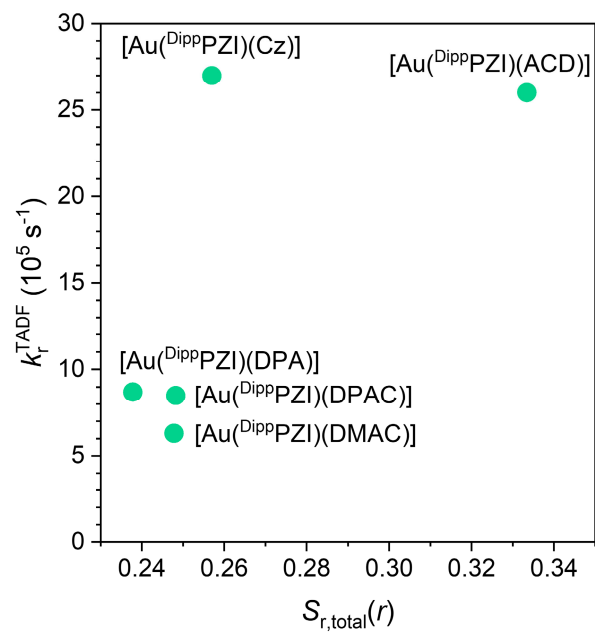

**Figure S17.** Correlation between  $k_r^{\text{TADF}}$  and  $S_{r,\text{total}}(r)$ .  $k_r^{\text{TADF}}$  increases with  $S_r(r)$ , and then reaches to a plateau.

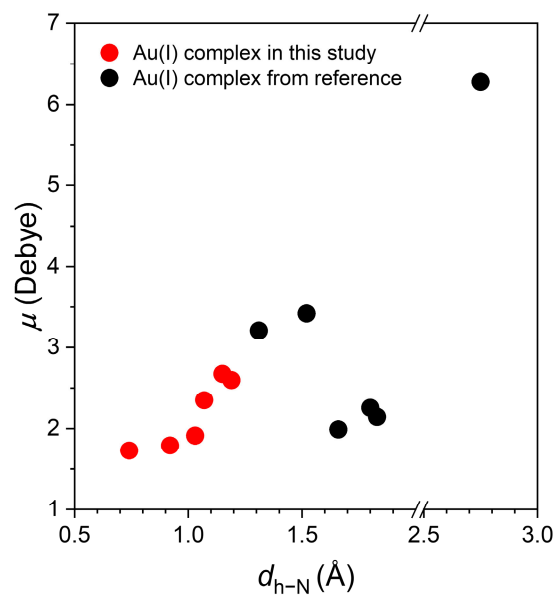

**Figure S18.** The relation between the transition dipole moment ( $\mu$ ) and  $d_{h-N}$  of the Au(I) complexes in this study (red circle) and previous Au(I) complexes (black circles).<sup>[2,12,13]</sup>

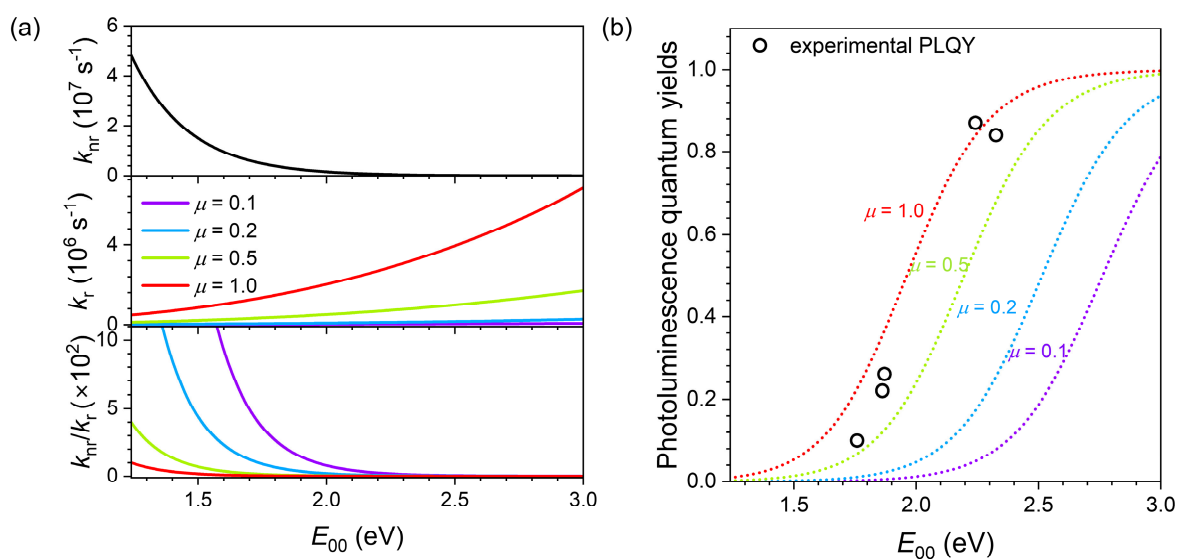

**Figure S19.** (a) The theoretical plots of predicted  $k_{nr}$ ,  $k_r$ , and  $k_{nr}/k_r$  as functions of  $E_{00}$ .  $k_{nr}$  values were calculated using eq 2 in the main text.  $k_r$  values were computed using the equation  $k_r/\mu^2 = K_\mu \cdot (n / 3\pi\epsilon_0\hbar^4c^3) \cdot E_{00}^3$  at various  $\mu$ , where  $\mu$  is the transition dipole moment,  $K_\mu$  is a conversion factor to express the transition dipole moment in Debye ( $1.11 \times 10^{-59} \text{ C}^2 \text{ m}^2 \text{ D}^{-2}$ ),  $n$  is the refractive index for the Zeonex host (1.53),  $\epsilon_0$  is the vacuum permittivity, and  $c$  is the speed of light. (b) The predicted photoluminescence quantum yields as functions of  $E_{00}$  with different transition dipole moments ( $\mu_s$ ) (dotted curves), and experimental photoluminescence quantum yields of Au(I) complexes (empty circles).



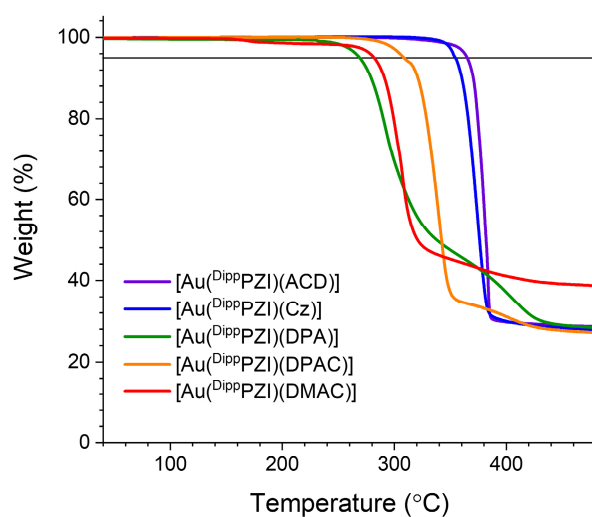

**Figure S20.** Thermogravimetric analyses of the Au(I) complexes performed at a heating rate of  $10\text{ }^{\circ}\text{C min}^{-1}$ . The horizontal line indicates a 5 wt % loss.

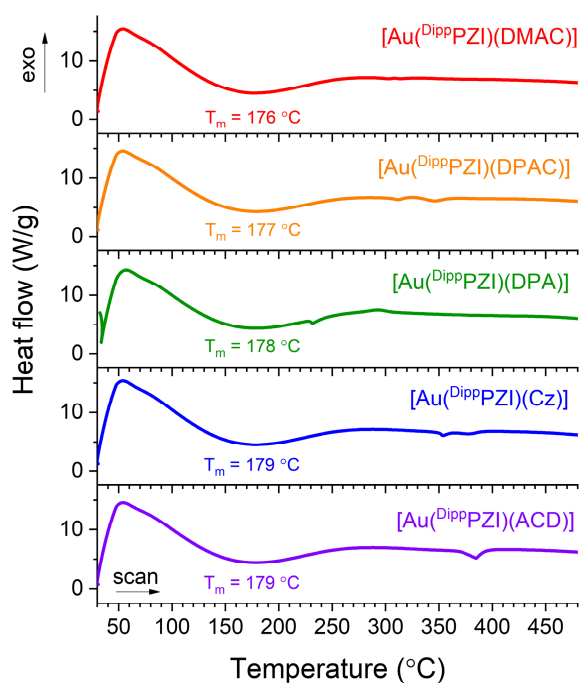

**Figure S21.** Differential scanning calorimetry results for Au(I) complexes.

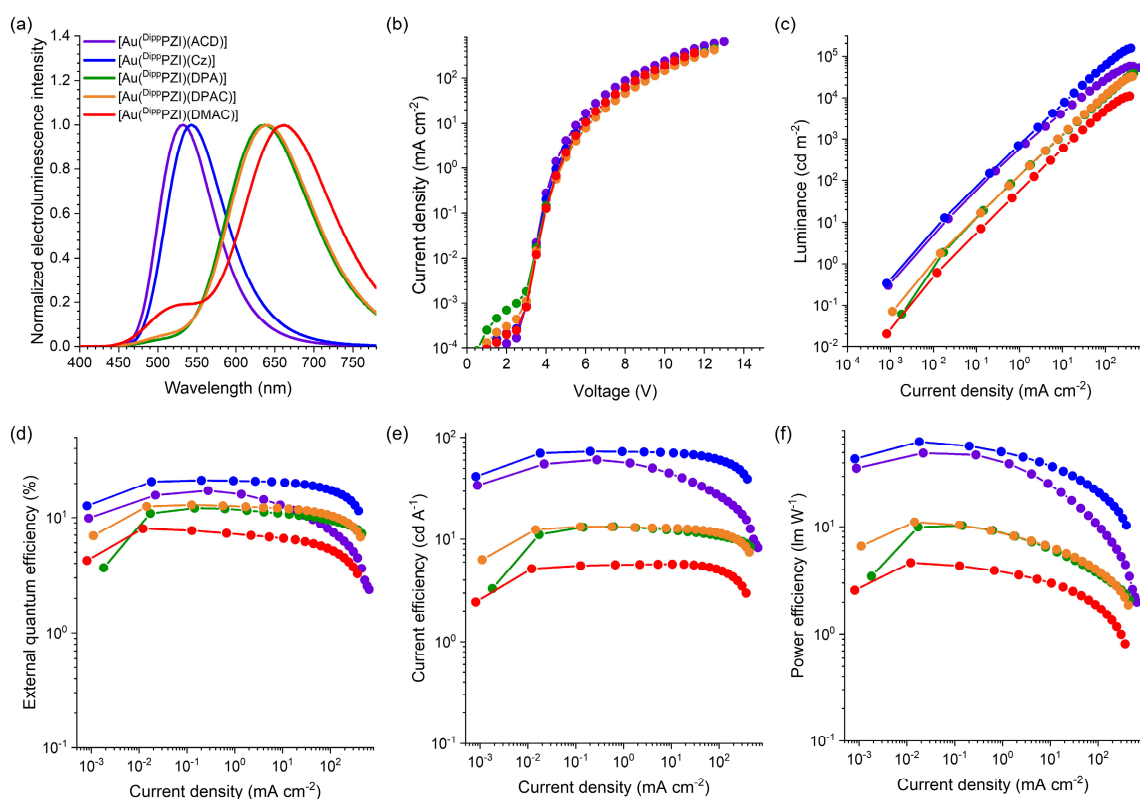

**Figure S22.** Electroluminescence behaviors of devices involving emitting layers doped with 1% Au(I) complex dopants. (a) Normalized electroluminescence spectra. (b) Current density–voltage curves. (c) Luminance–current density curves. (d) External quantum efficiencies–current density curves. (e) Current efficiency–current density curves. (f) Power efficiency–current density curves.

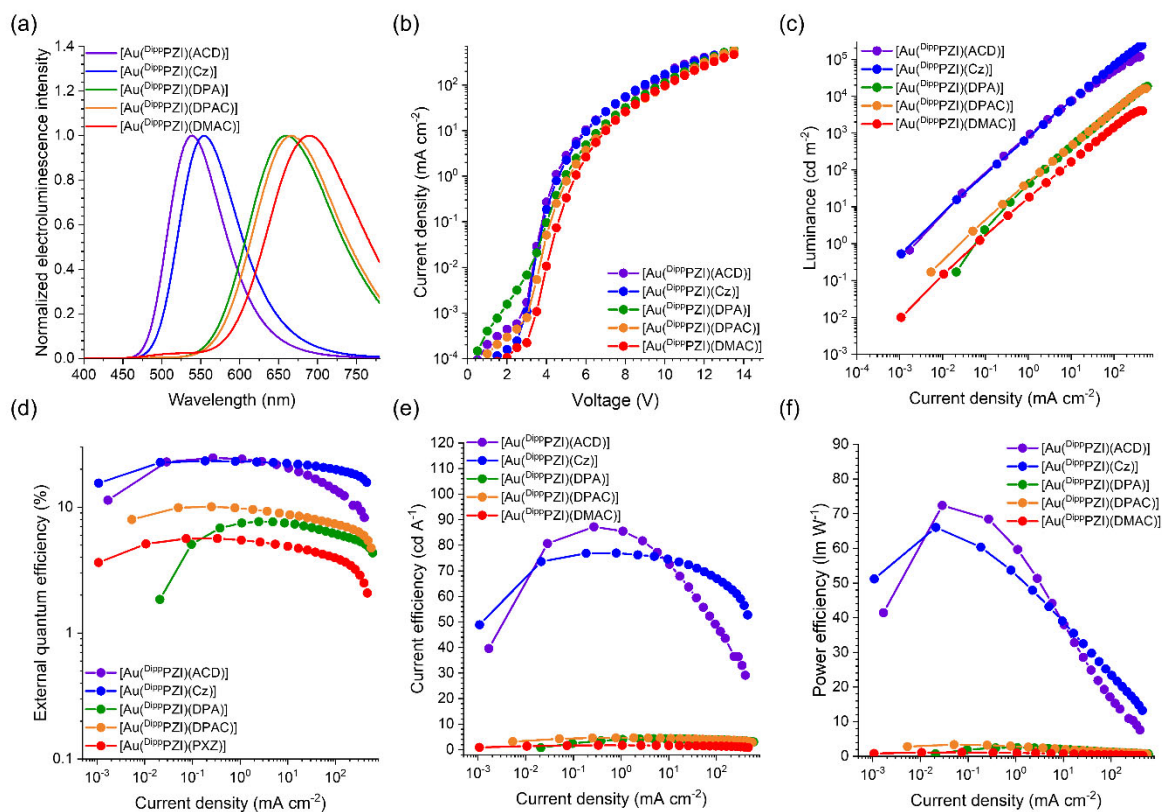

**Figure S23.** Electroluminescence behaviors of devices involving emitting layers doped with 5% Au(I) complex dopants. (a) Normalized electroluminescence spectra. (b) Current density–voltage curves. (c) Luminance–current density curves. (d) External quantum efficiencies–current density curves. (e) Current efficiency–current density curves. (f) Power efficiency–current density curves.

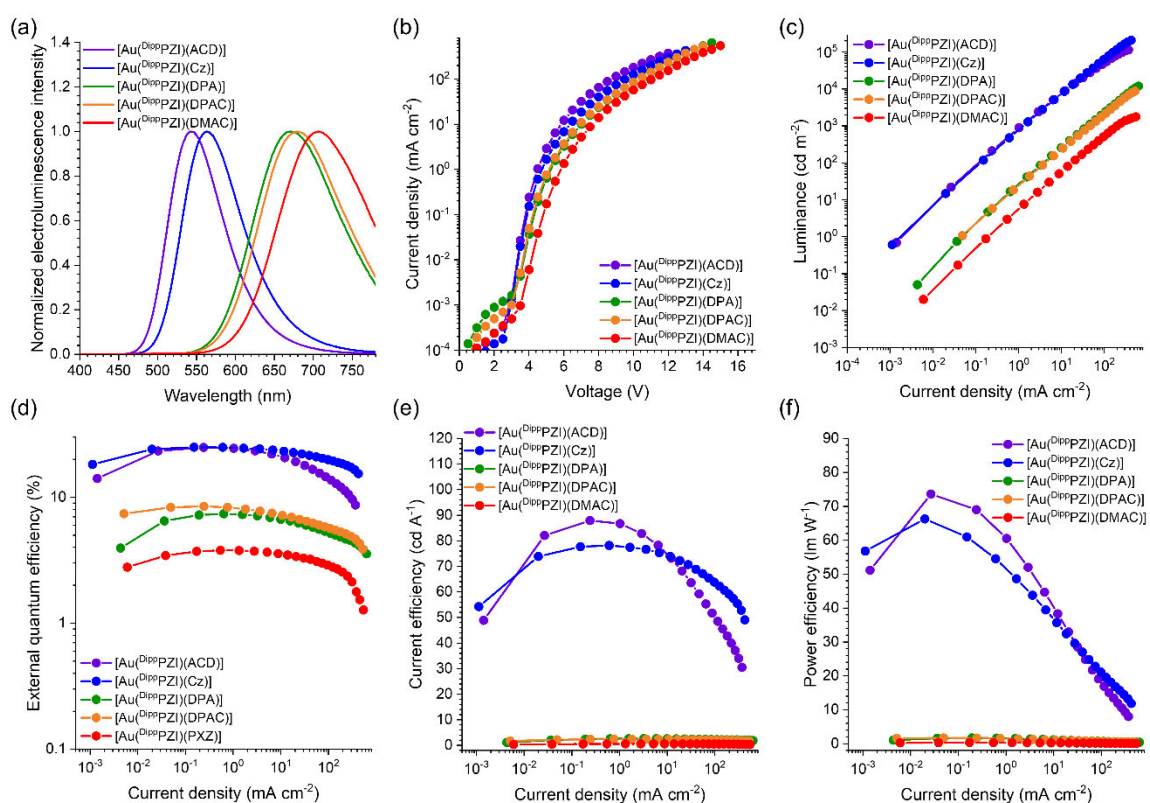

**Figure S24.** Electroluminescence behaviors of devices involving emitting layers doped with 10% Au(I) complex dopants. (a) Normalized electroluminescence spectra. (b) Current density–voltage curves. (c) Luminance–current density curves. (d) External quantum efficiencies–current density curves. (e) Current efficiency–current density curves. (f) Power efficiency–current density curves.

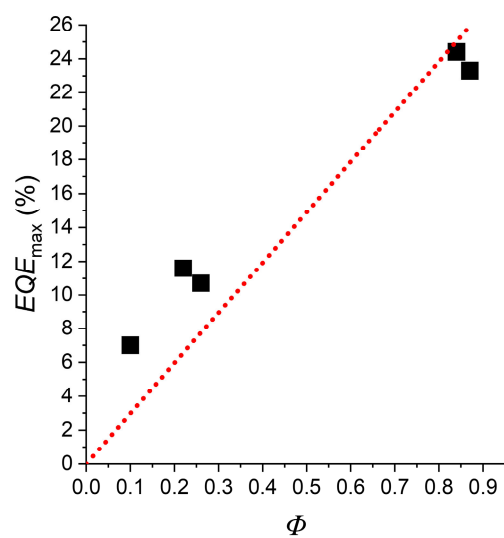

**Figure S25.** Correlation between  $EQE_{\max}$  recorded for the devices involving 3% Au(I) complex dopants and  $\Phi$  of Zeonex films doped with 5 wt % Au(I) complexes.

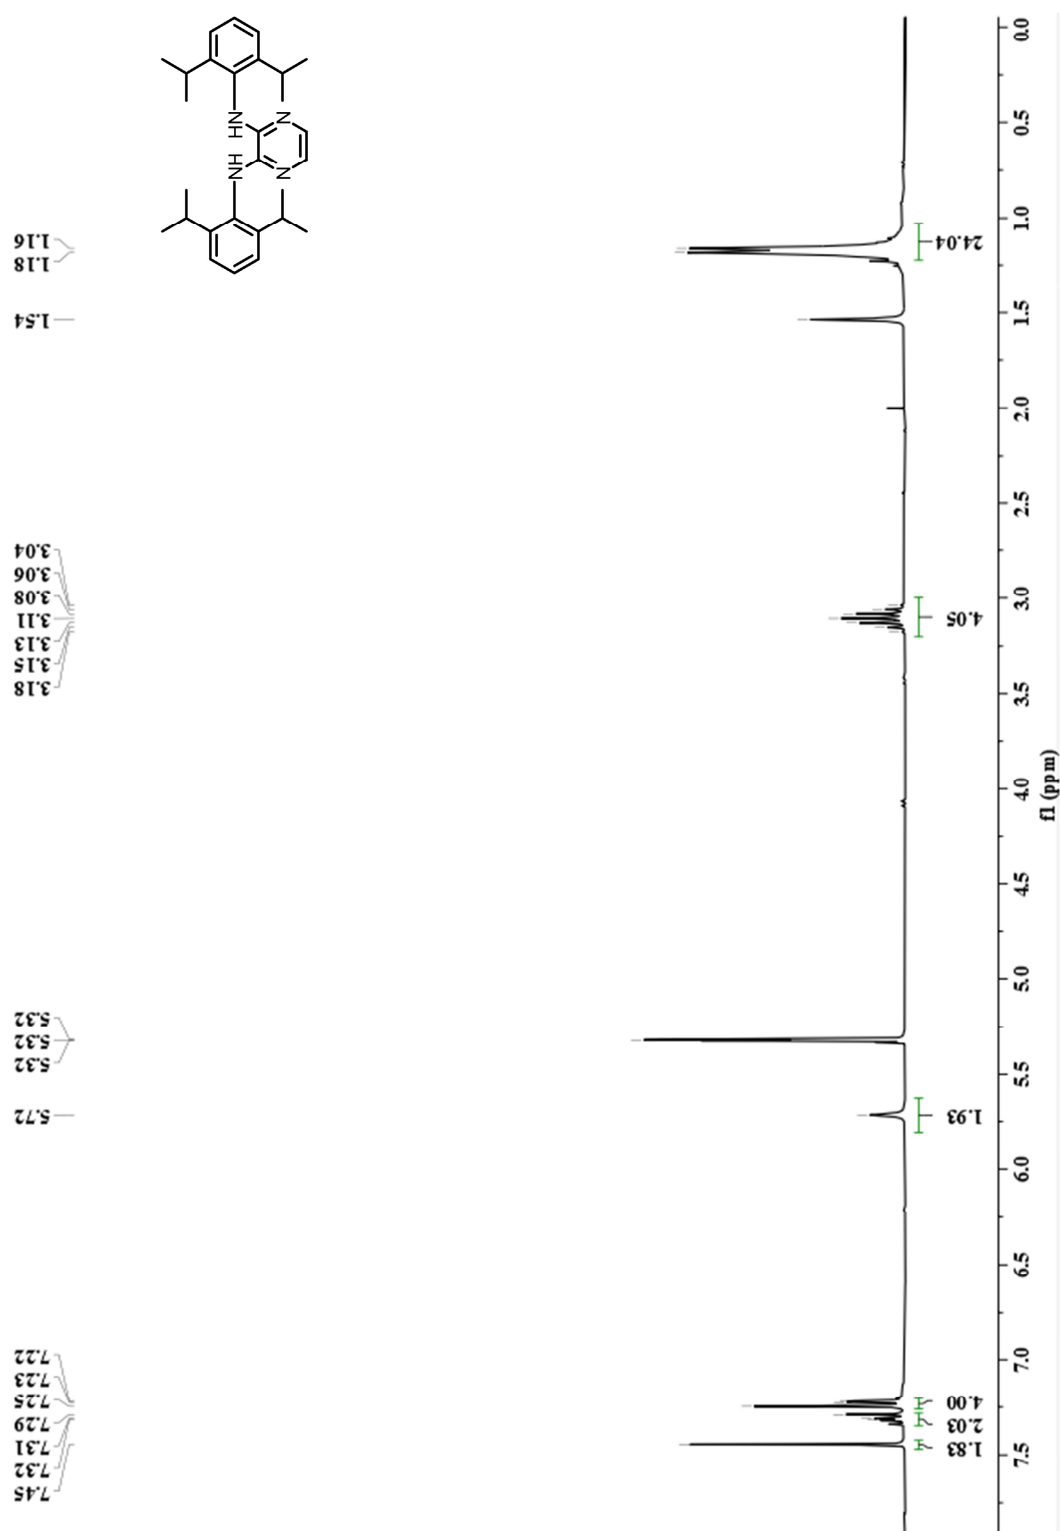

**Figure S26.**  $^1\text{H}$  NMR (300 MHz,  $\text{CD}_2\text{Cl}_2$ ) spectrum of  $N^2,N^3$ -bis(2,6-diisopropylphenyl)pyrazine-2,3-diamine.

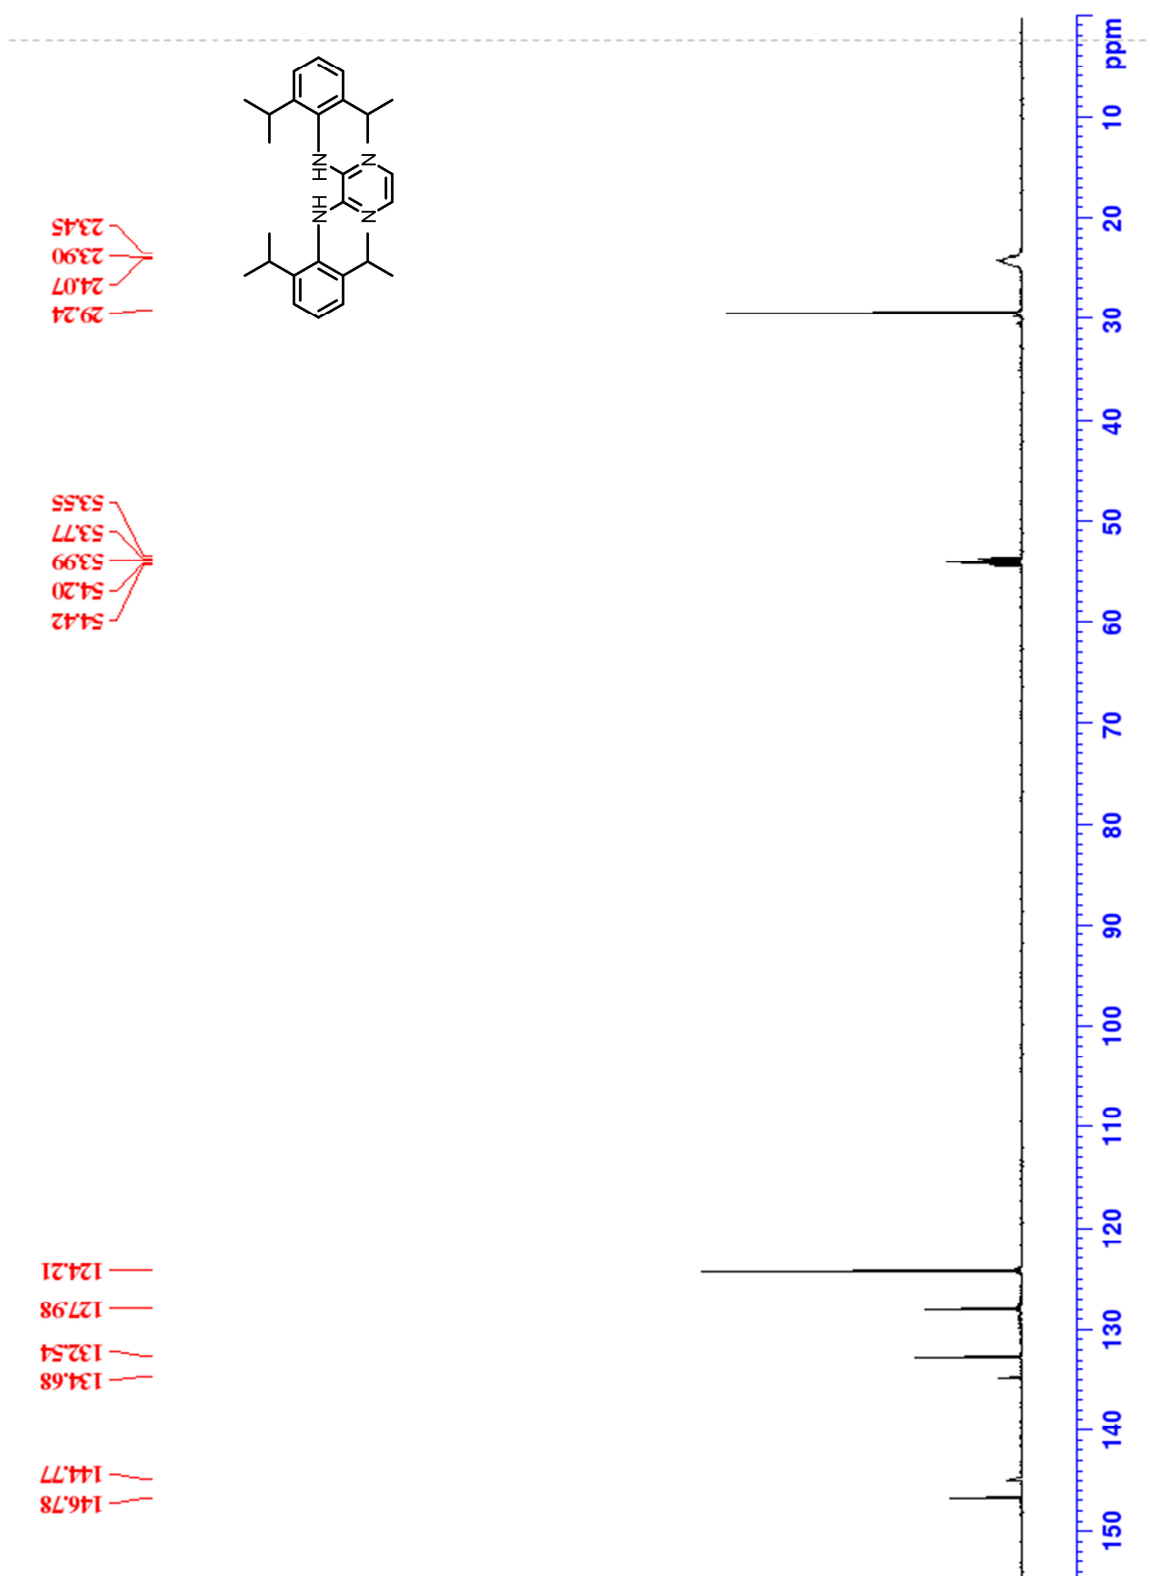

**Figure S27.**  $^{13}\text{C}\{^1\text{H}\}$  NMR (126 MHz,  $\text{CD}_2\text{Cl}_2$ ) spectrum of  $N^2,N^3$ -bis(2,6-diisopropylphenyl)pyrazine-2,3-diamine.



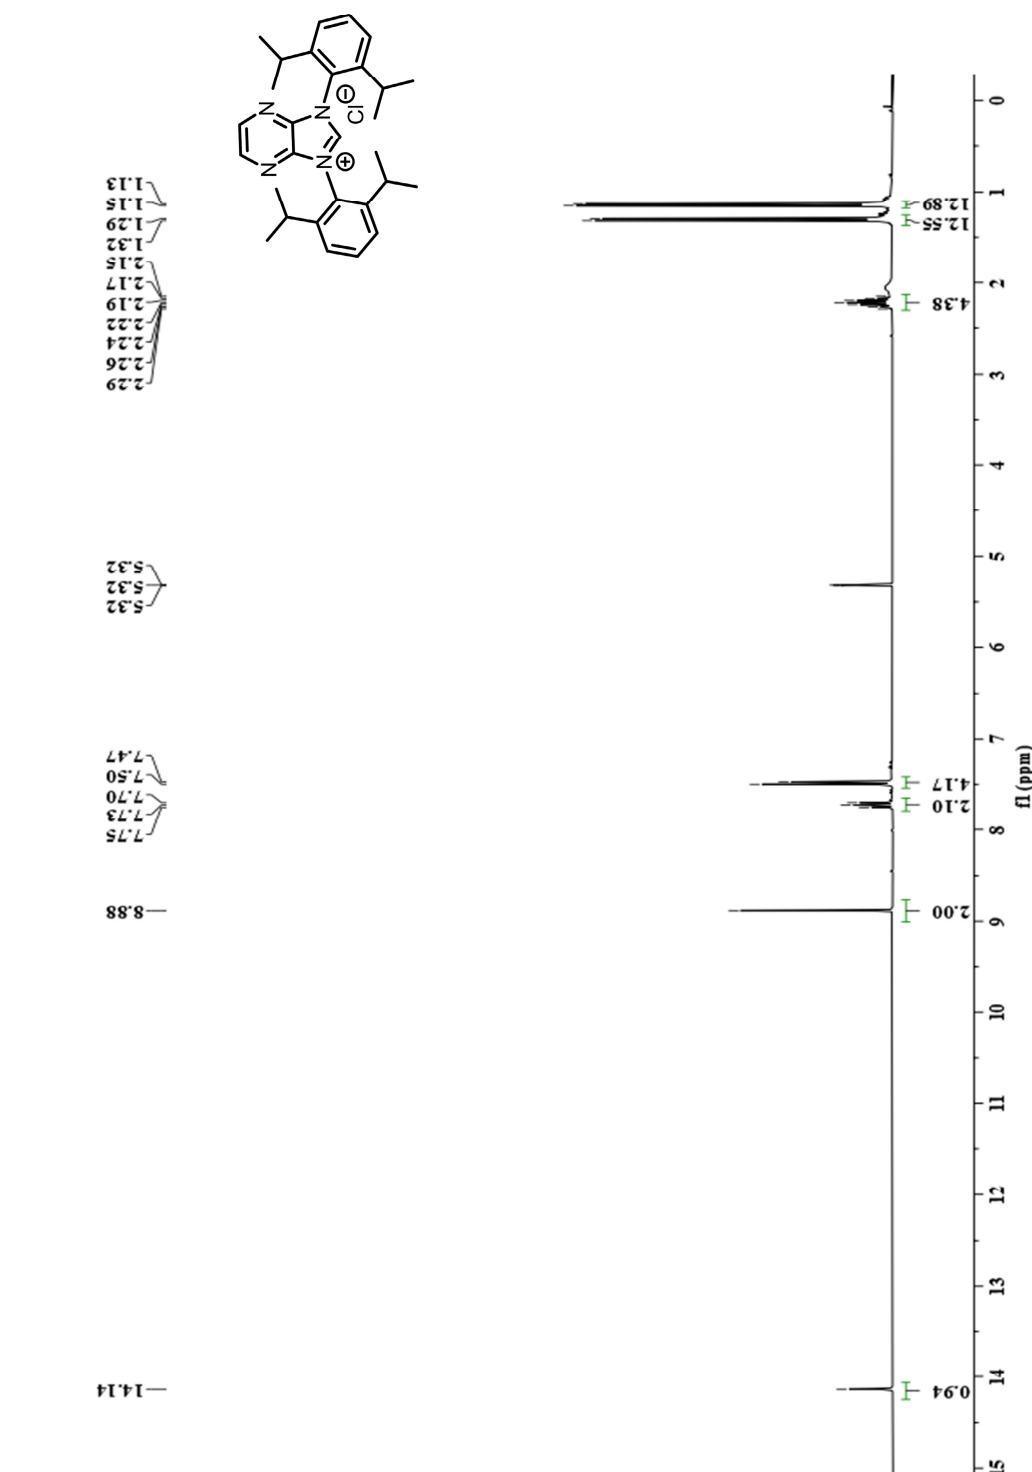

**Figure S28.** <sup>1</sup>H NMR (300 MHz, CD<sub>2</sub>Cl<sub>2</sub>) spectrum of 1,3-bis(2,6-diisopropylphenyl)-1H-imidazo[4,5-b]pyrazine-3-ium chloride.

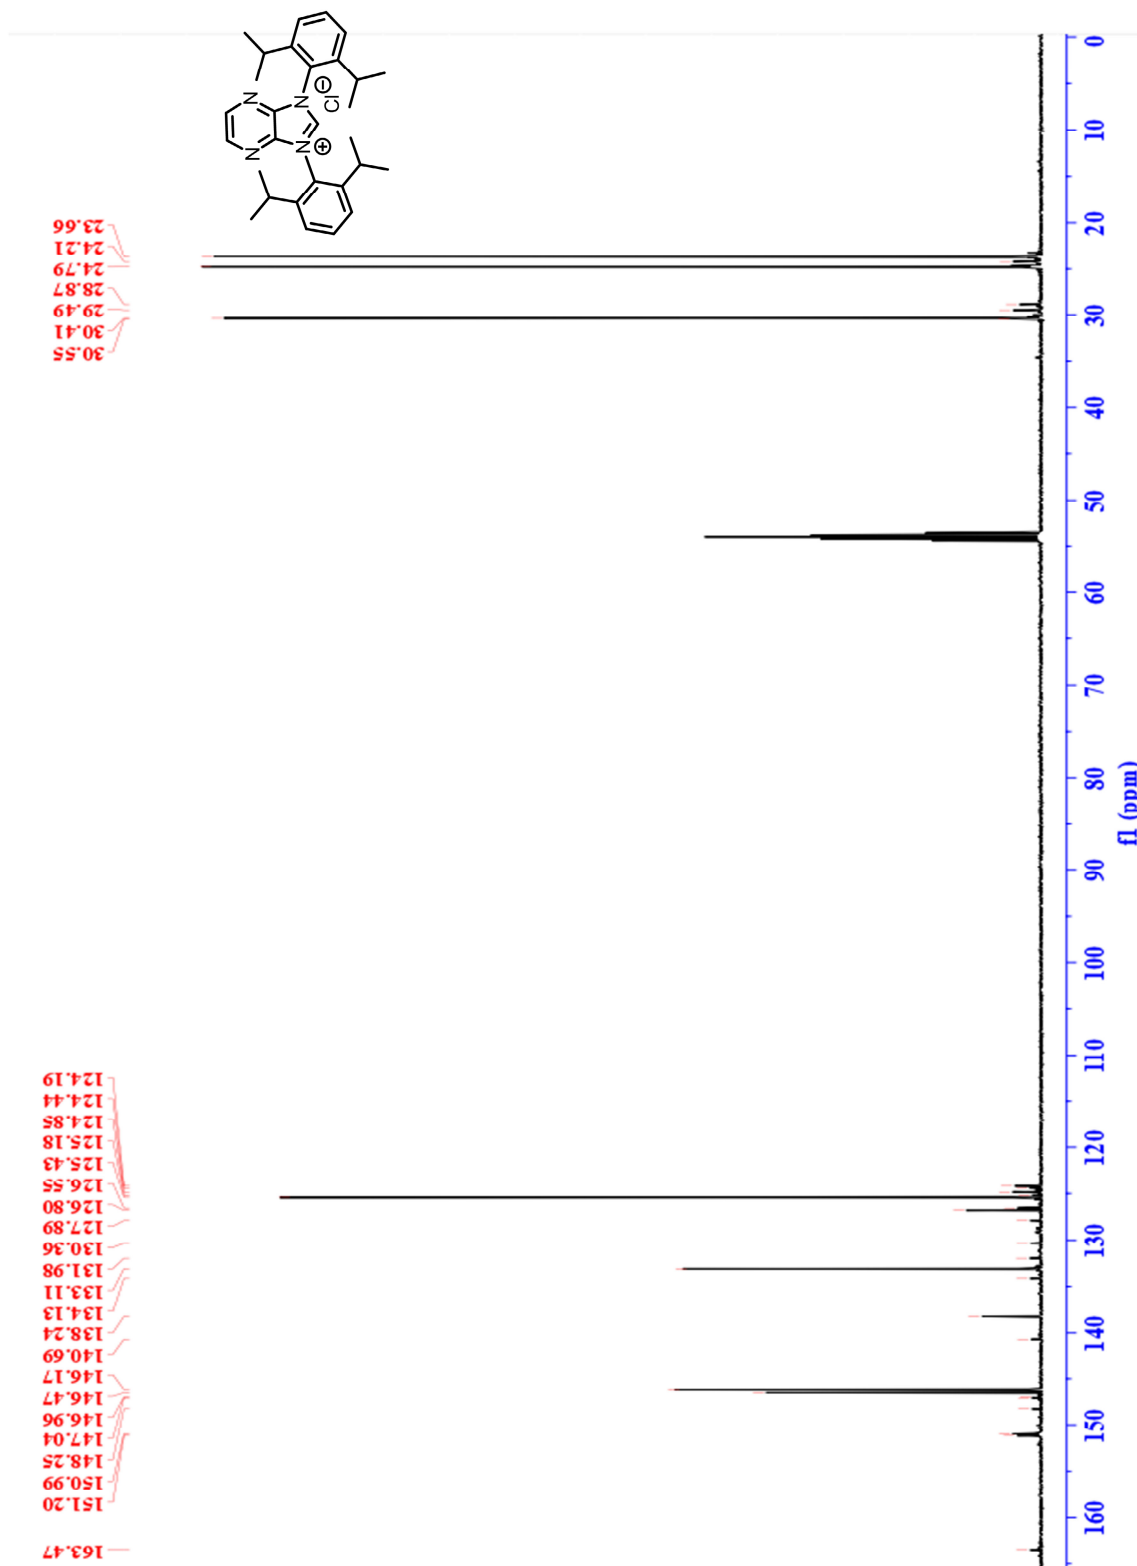

**Figure S29.**  $^{13}\text{C}\{^1\text{H}\}$  NMR (126 MHz,  $\text{CD}_2\text{Cl}_2$ ) spectrum of 1,3-bis(2,6-diisopropylphenyl)-1*H*-imidazo[4,5-*b*]pyrazine-3-ium chloride.

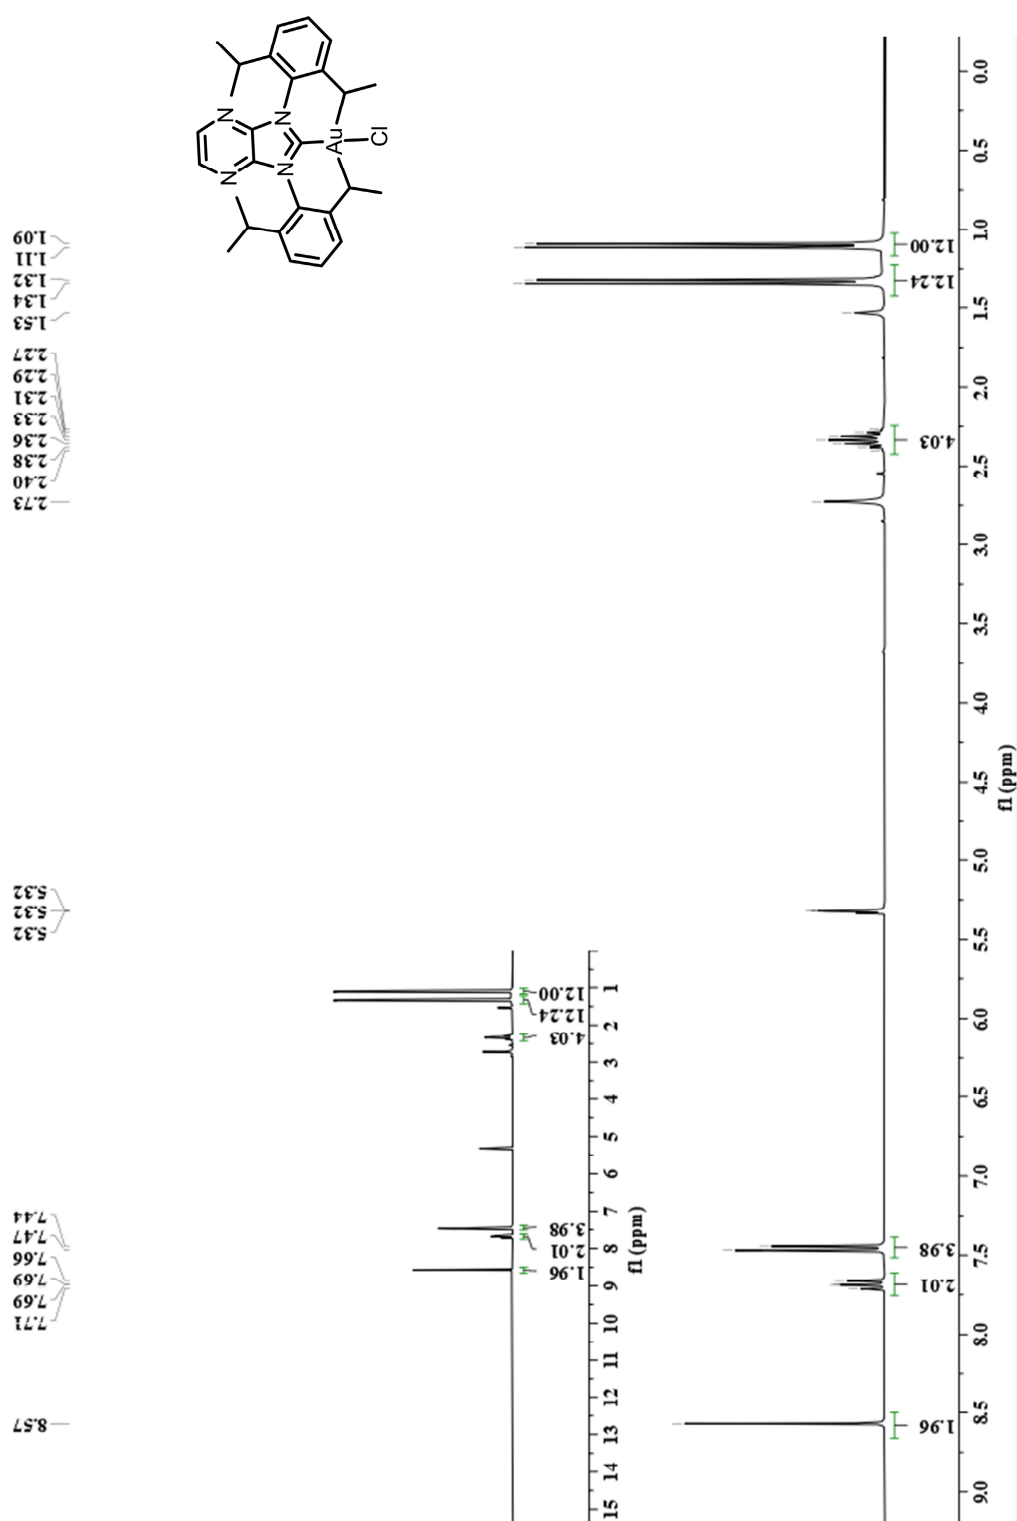

Figure S30.  $^1\text{H}$  NMR (300 MHz,  $\text{CD}_2\text{Cl}_2$ ) spectrum of  $[\text{Au}(\text{DippPZI})(\text{Cl})]$ .

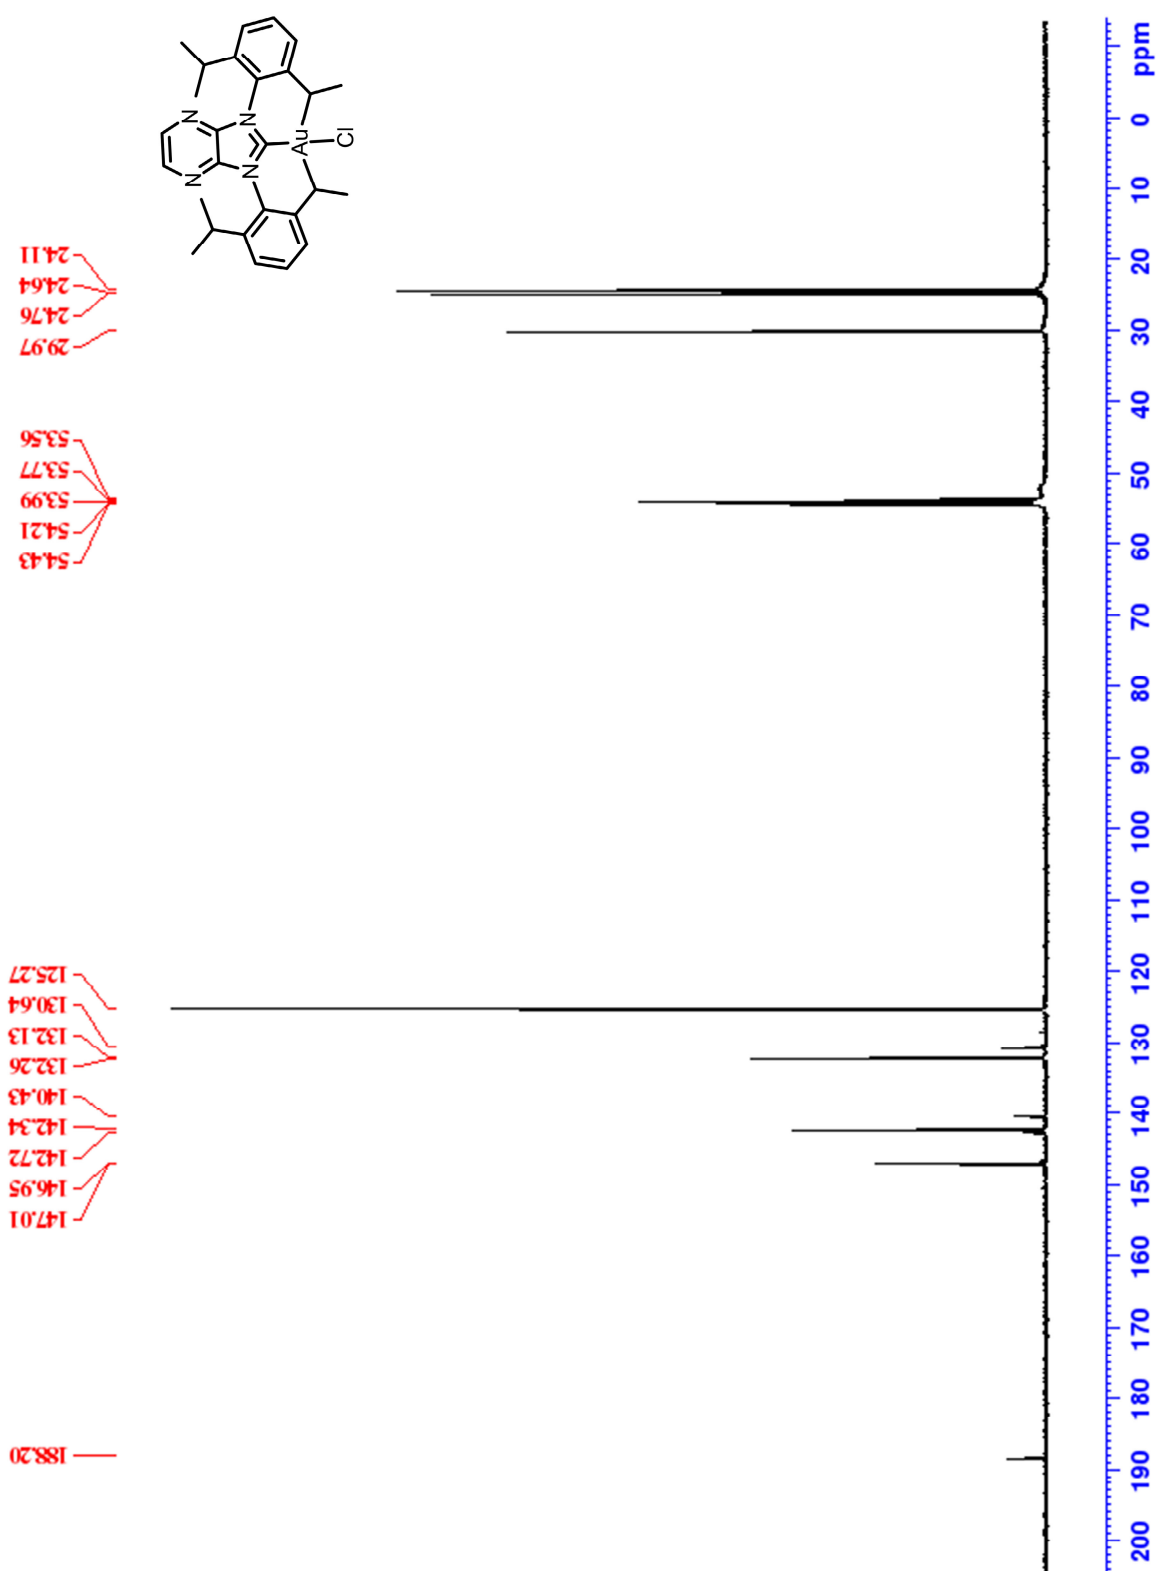

Figure S31.  $^{13}\text{C}\{^1\text{H}\}$  NMR (126 MHz,  $\text{CD}_2\text{Cl}_2$ ) spectrum of  $[\text{Au}(\text{DippPZl})(\text{Cl})]$ .

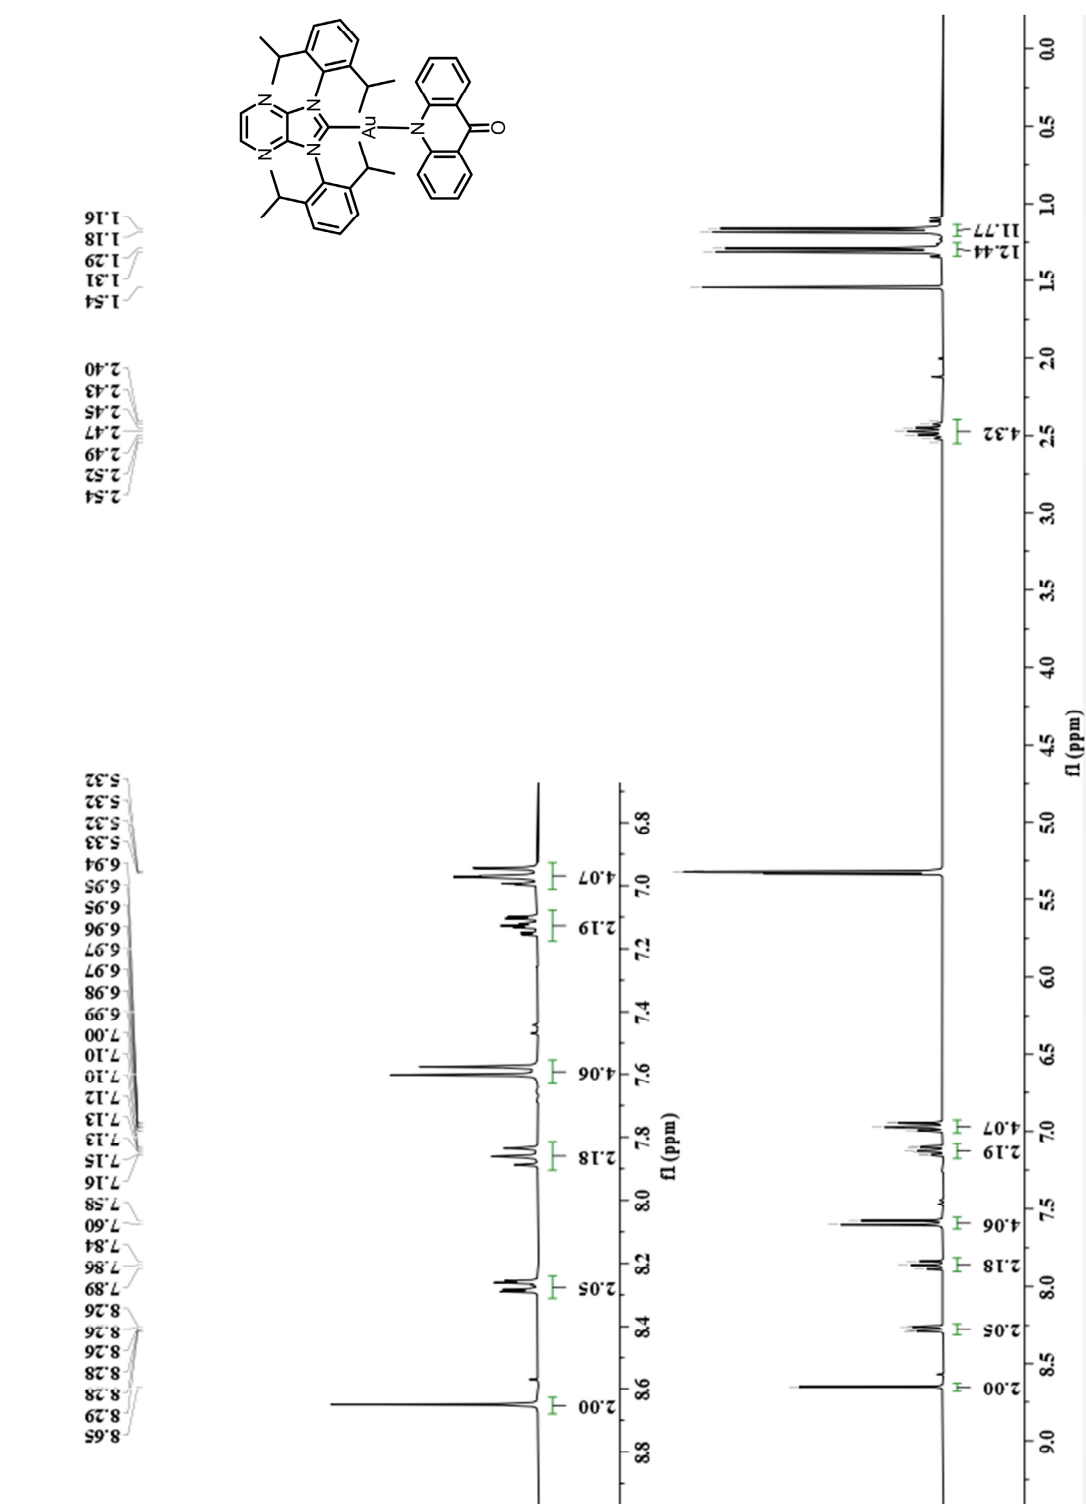

Figure S32.  $^1\text{H}$  NMR (300 MHz,  $\text{CD}_2\text{Cl}_2$ ) spectrum of  $[\text{Au}(\text{DippPZI})(\text{ACD})]$ .

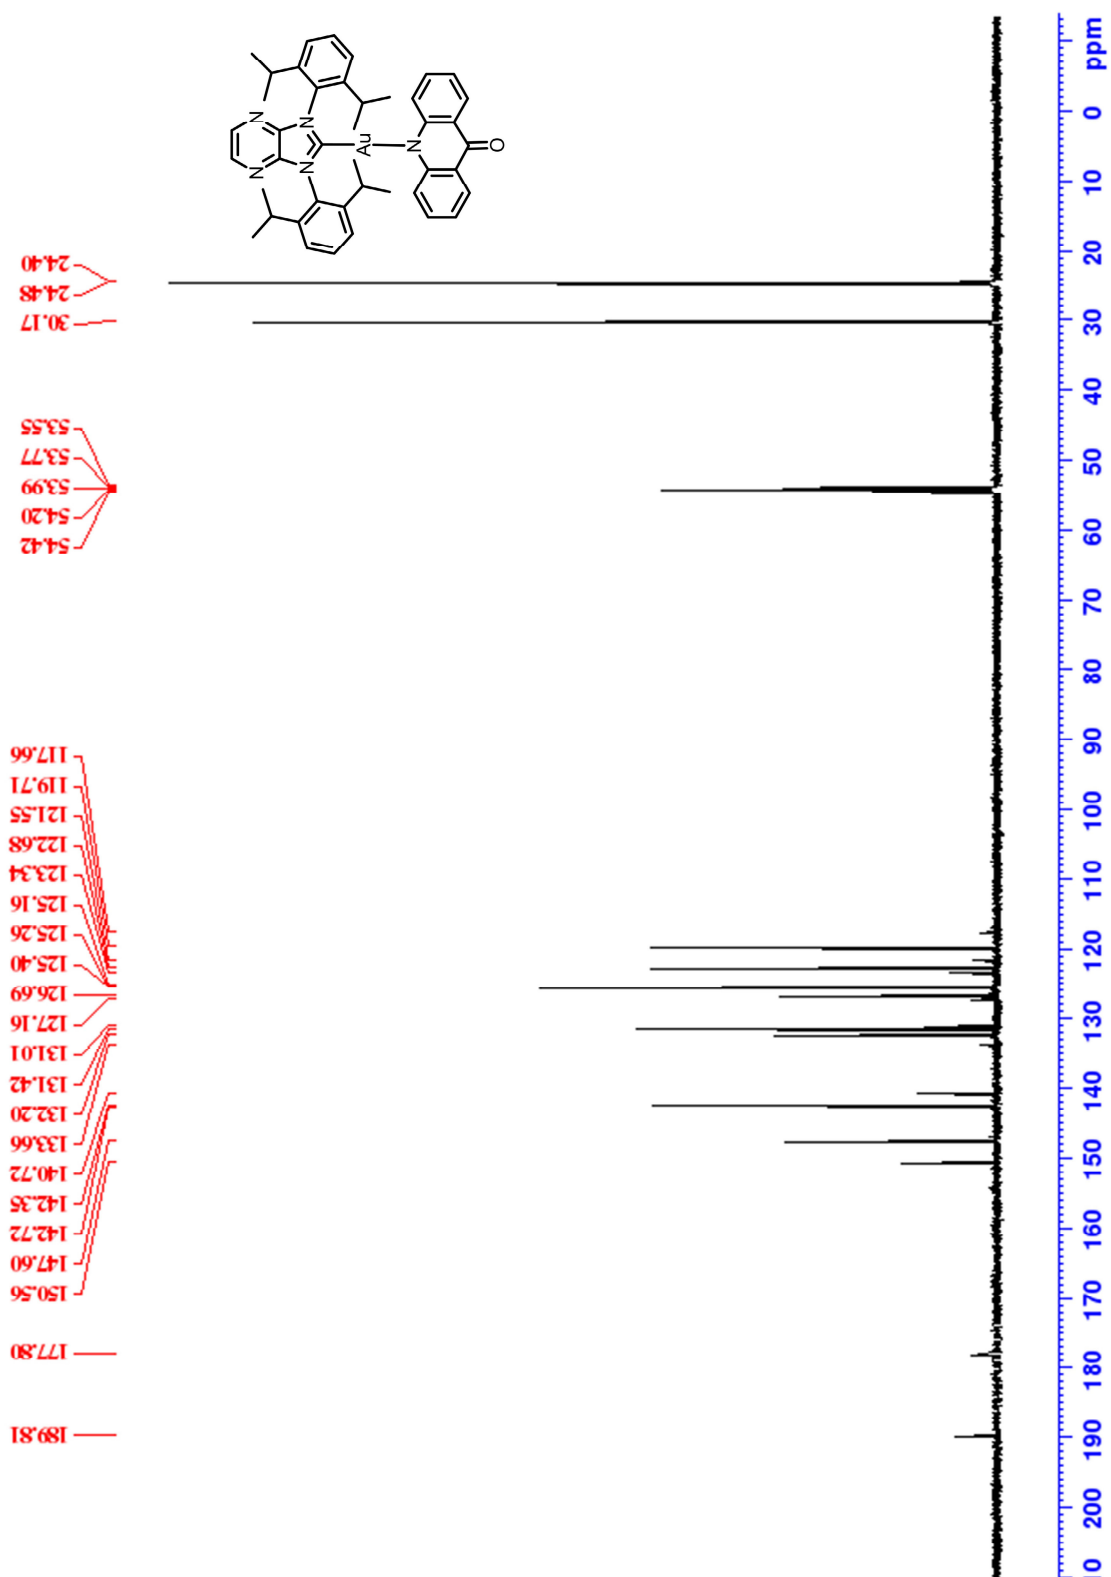

**Figure S33.**  $^{13}\text{C}\{^1\text{H}\}$  NMR (126 MHz,  $\text{CD}_2\text{Cl}_2$ ) spectrum of  $[\text{Au}(\text{DippPZI})(\text{ACD})]$ .

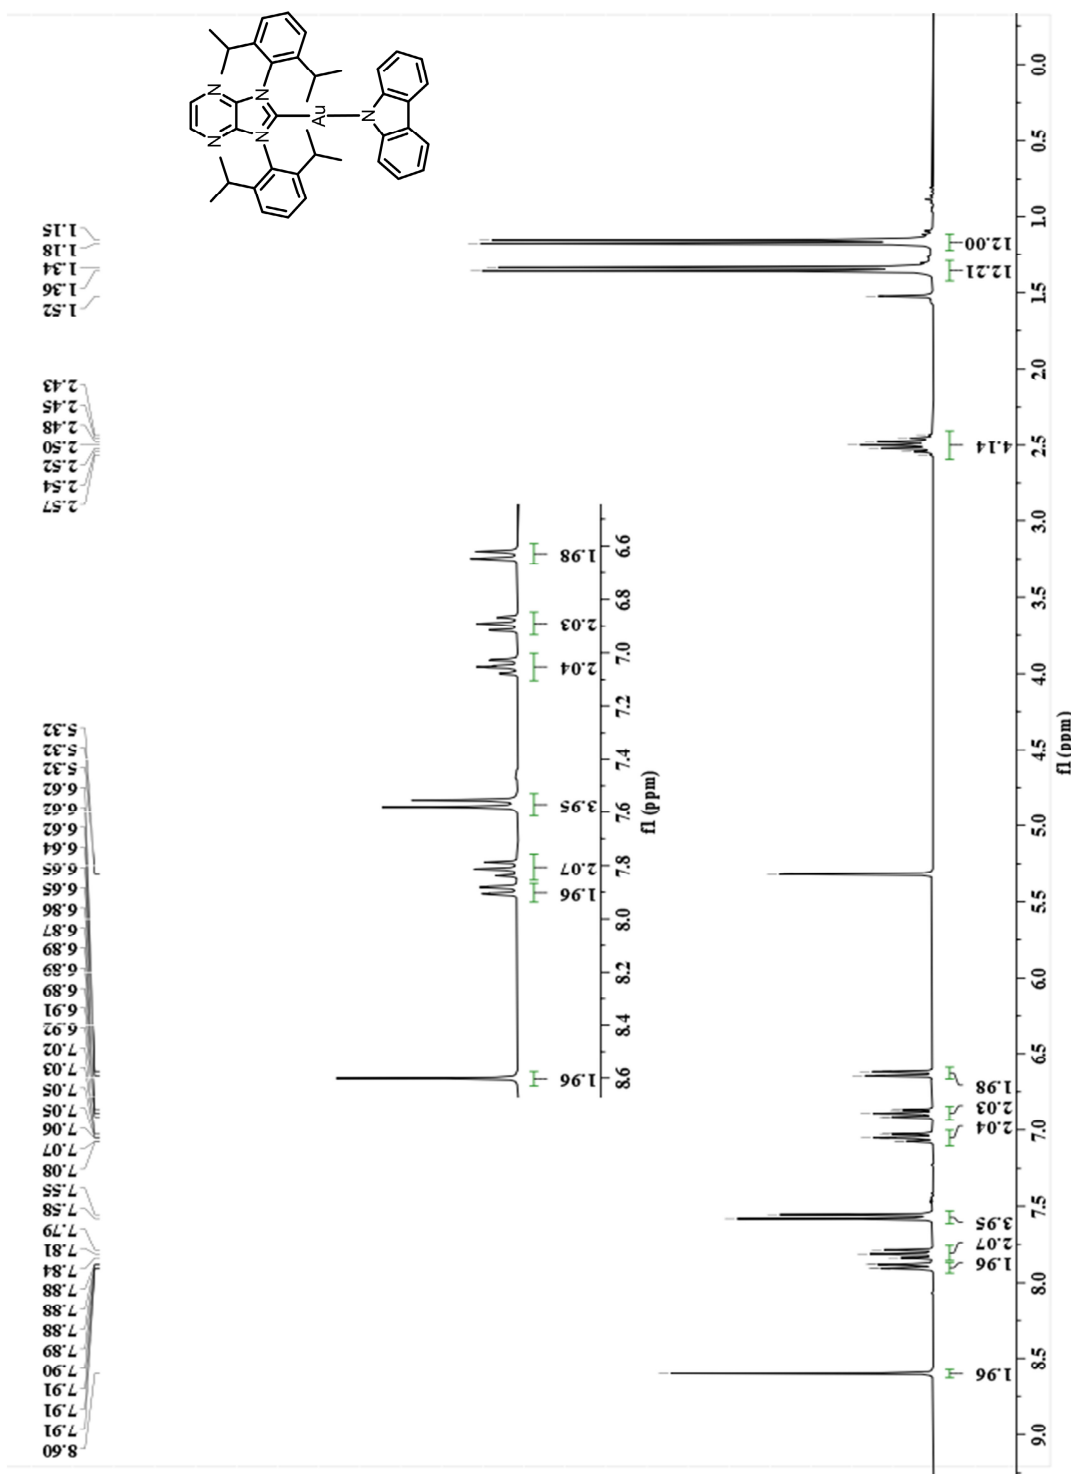

Figure S34.  $^1\text{H}$  NMR (300 MHz,  $\text{CD}_2\text{Cl}_2$ ) spectrum of  $[\text{Au}(\text{DippPZI})(\text{Cz})]$ .

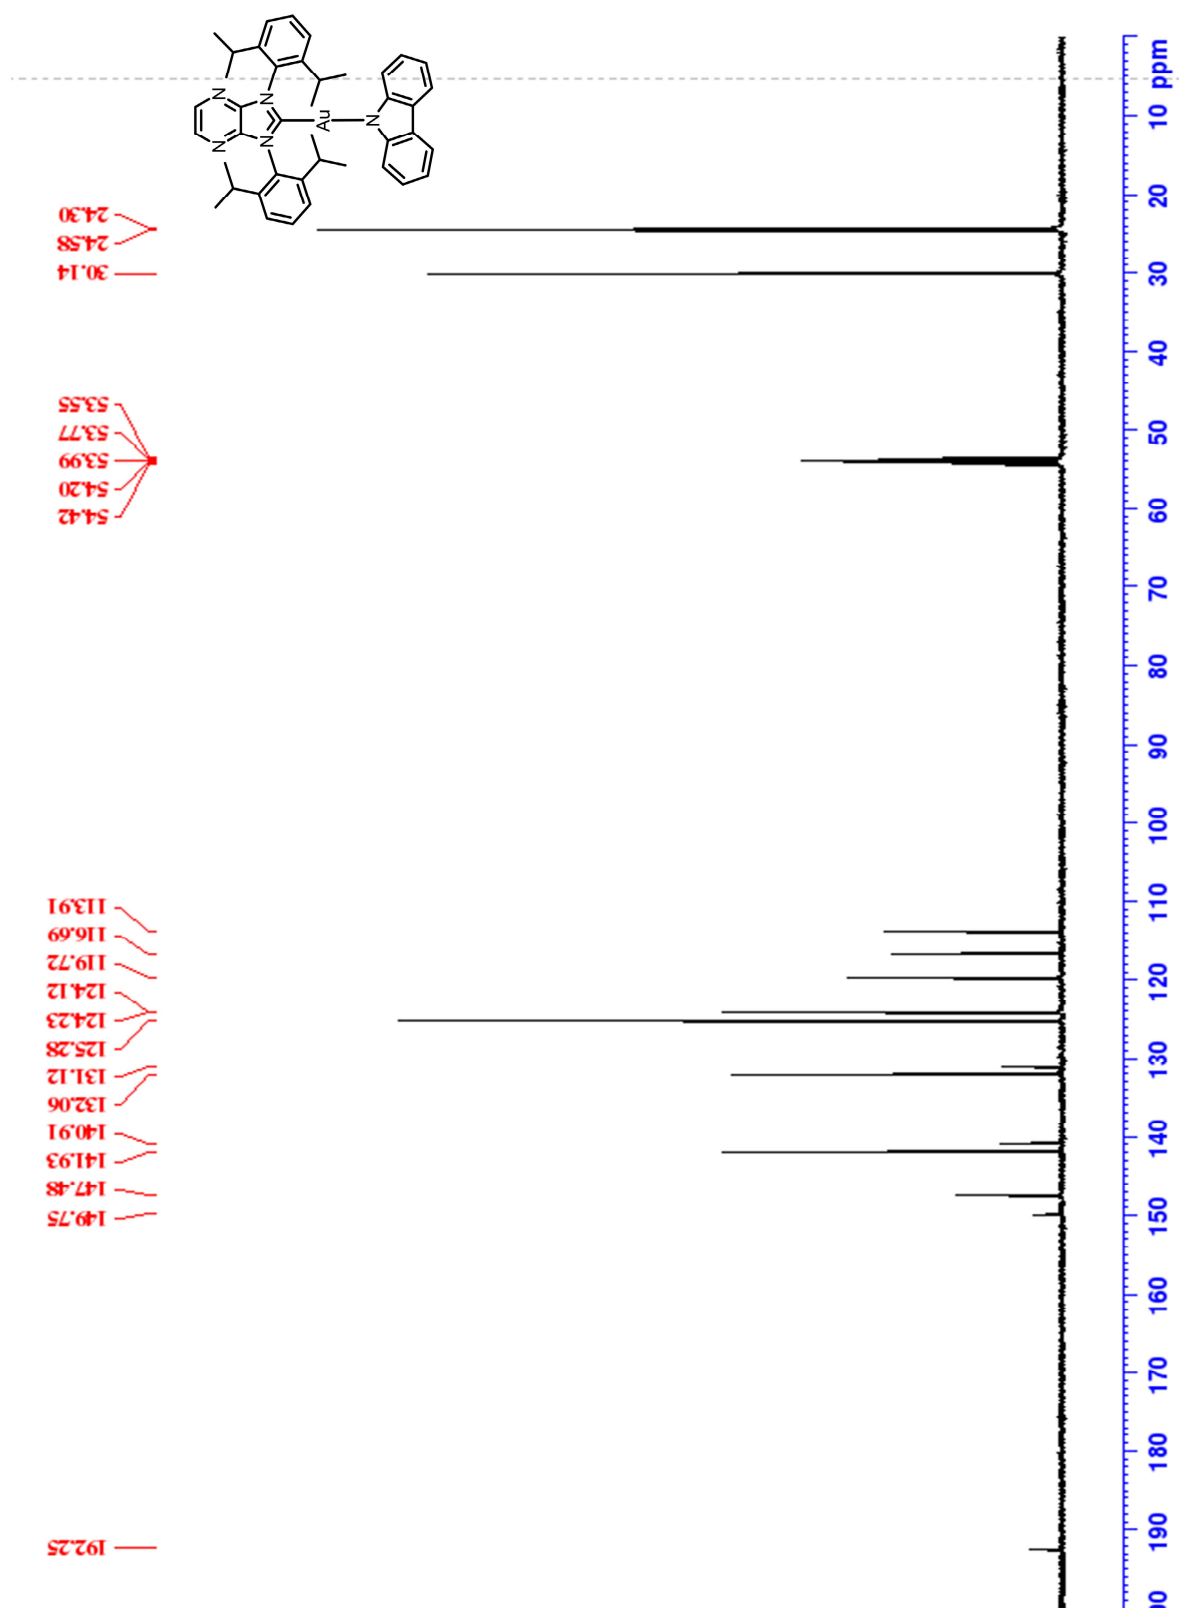

Figure S35.  $^{13}\text{C}\{^1\text{H}\}$  NMR (126 MHz,  $\text{CD}_2\text{Cl}_2$ ) spectrum of  $[\text{Au}(\text{DippPZI})(\text{Cz})]$ .



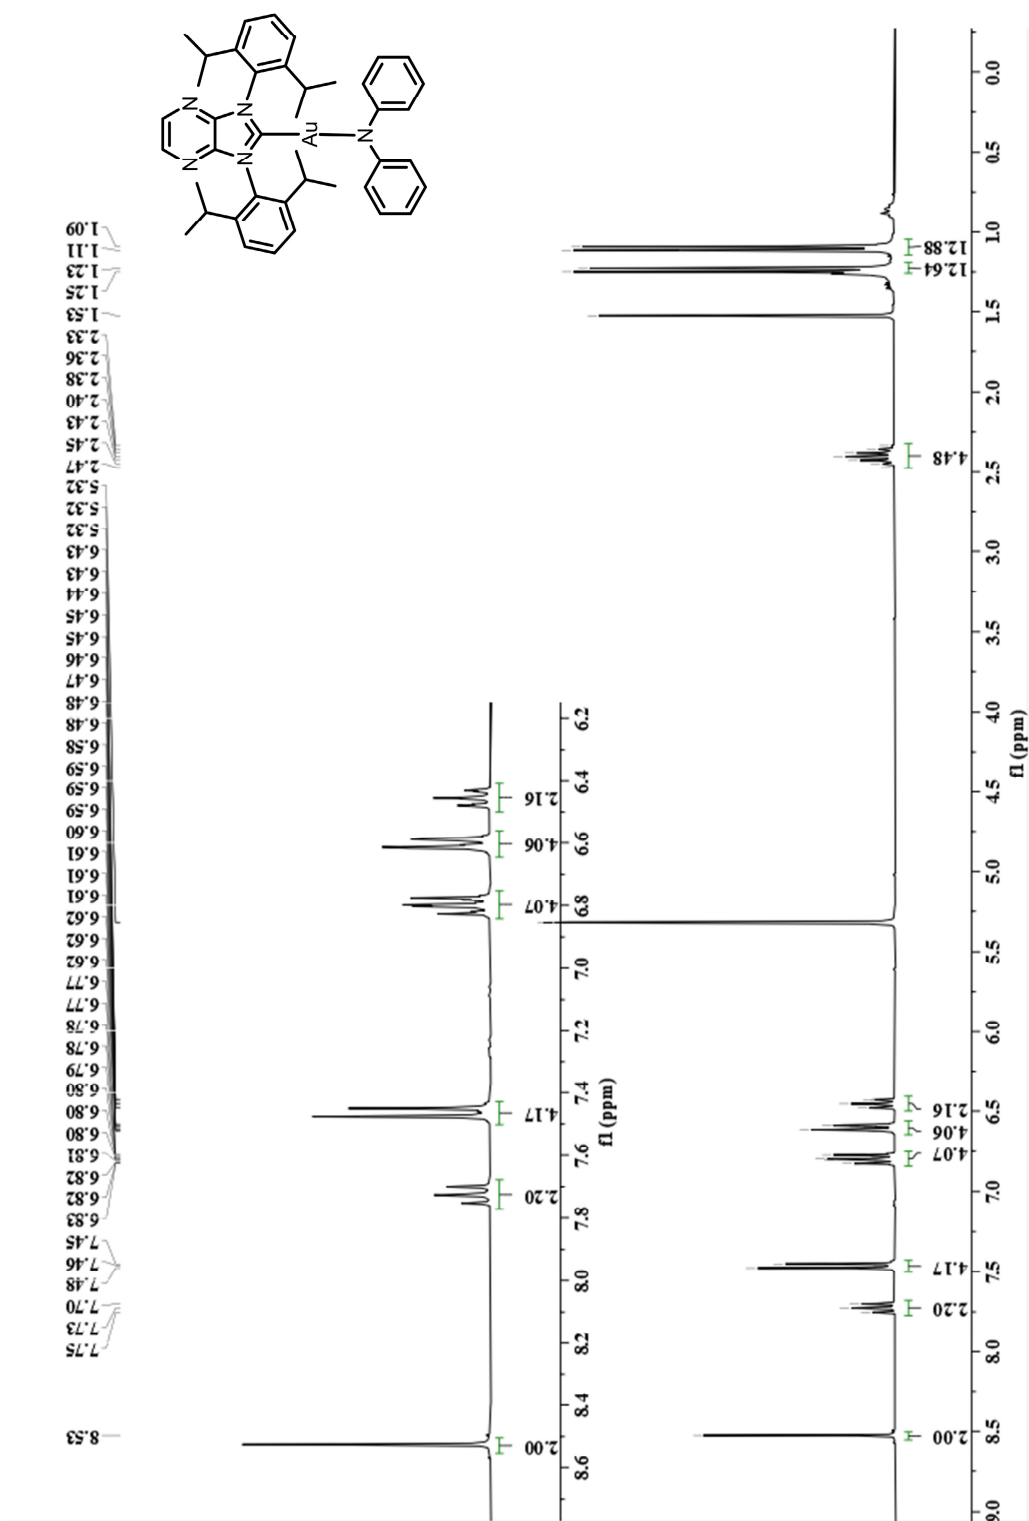

Figure S36.  $^1\text{H}$  NMR (300 MHz,  $\text{CD}_2\text{Cl}_2$ ) spectrum of  $[\text{Au}(\text{DippPZI})(\text{DPA})]$ .

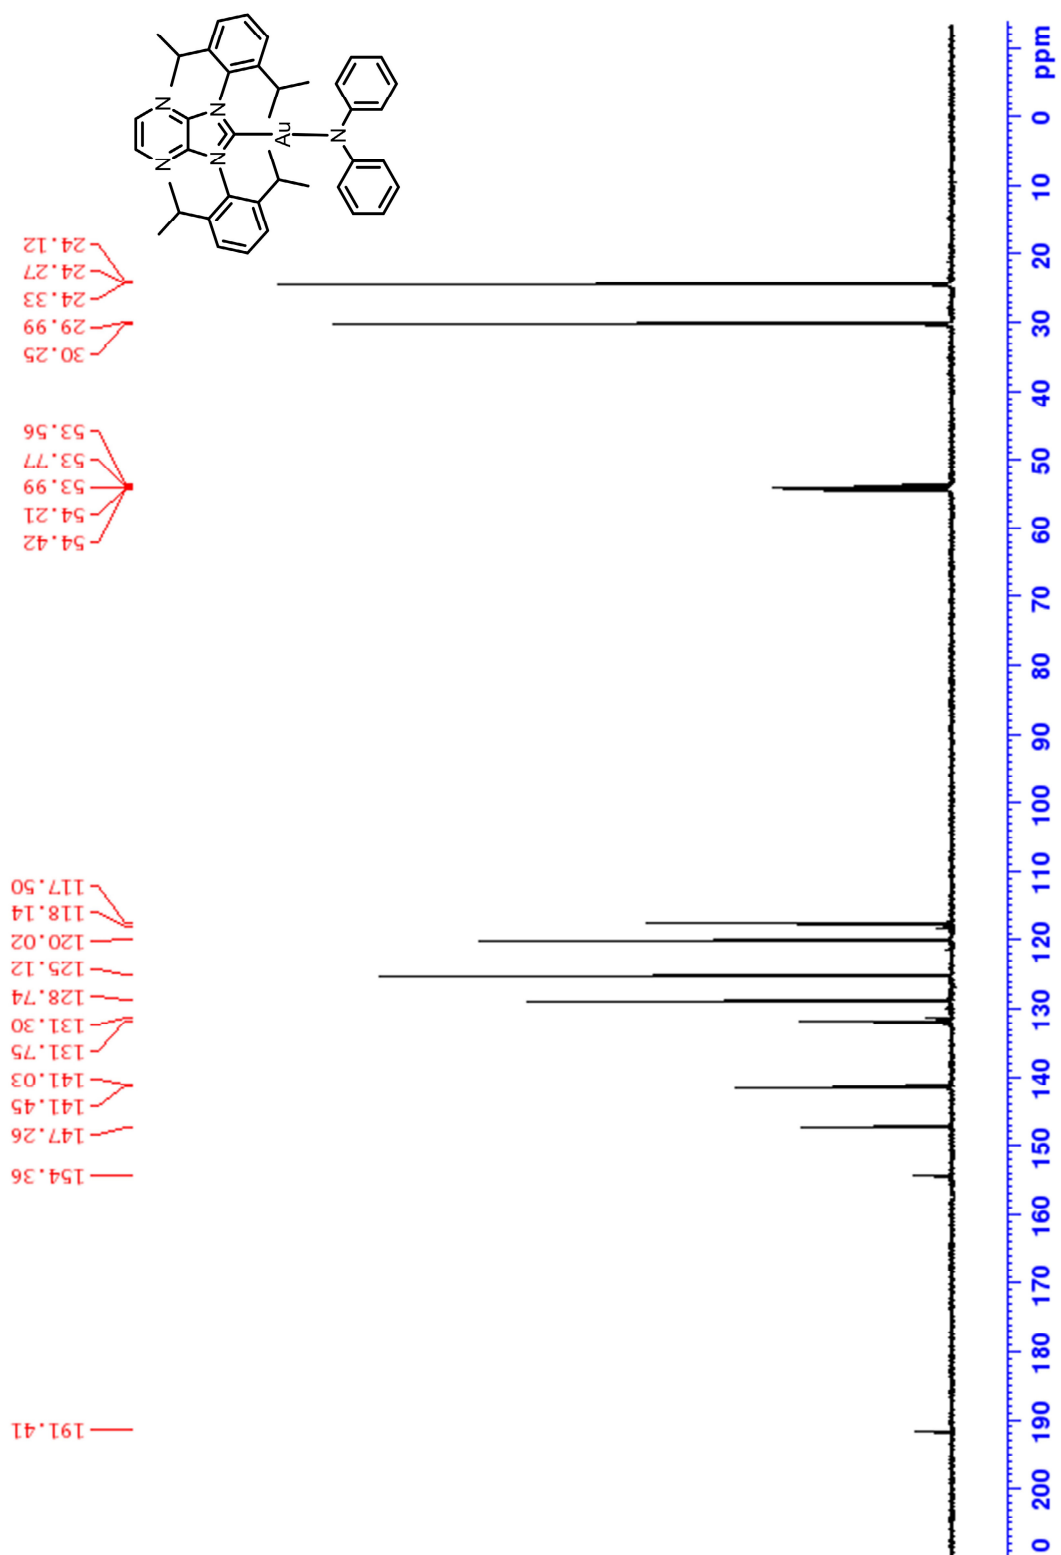

**Figure S37.**  $^{13}\text{C}\{^1\text{H}\}$  NMR (126 MHz,  $\text{CD}_2\text{Cl}_2$ ) spectrum of  $[\text{Au}(\text{DippPZI})(\text{DPA})]$ .

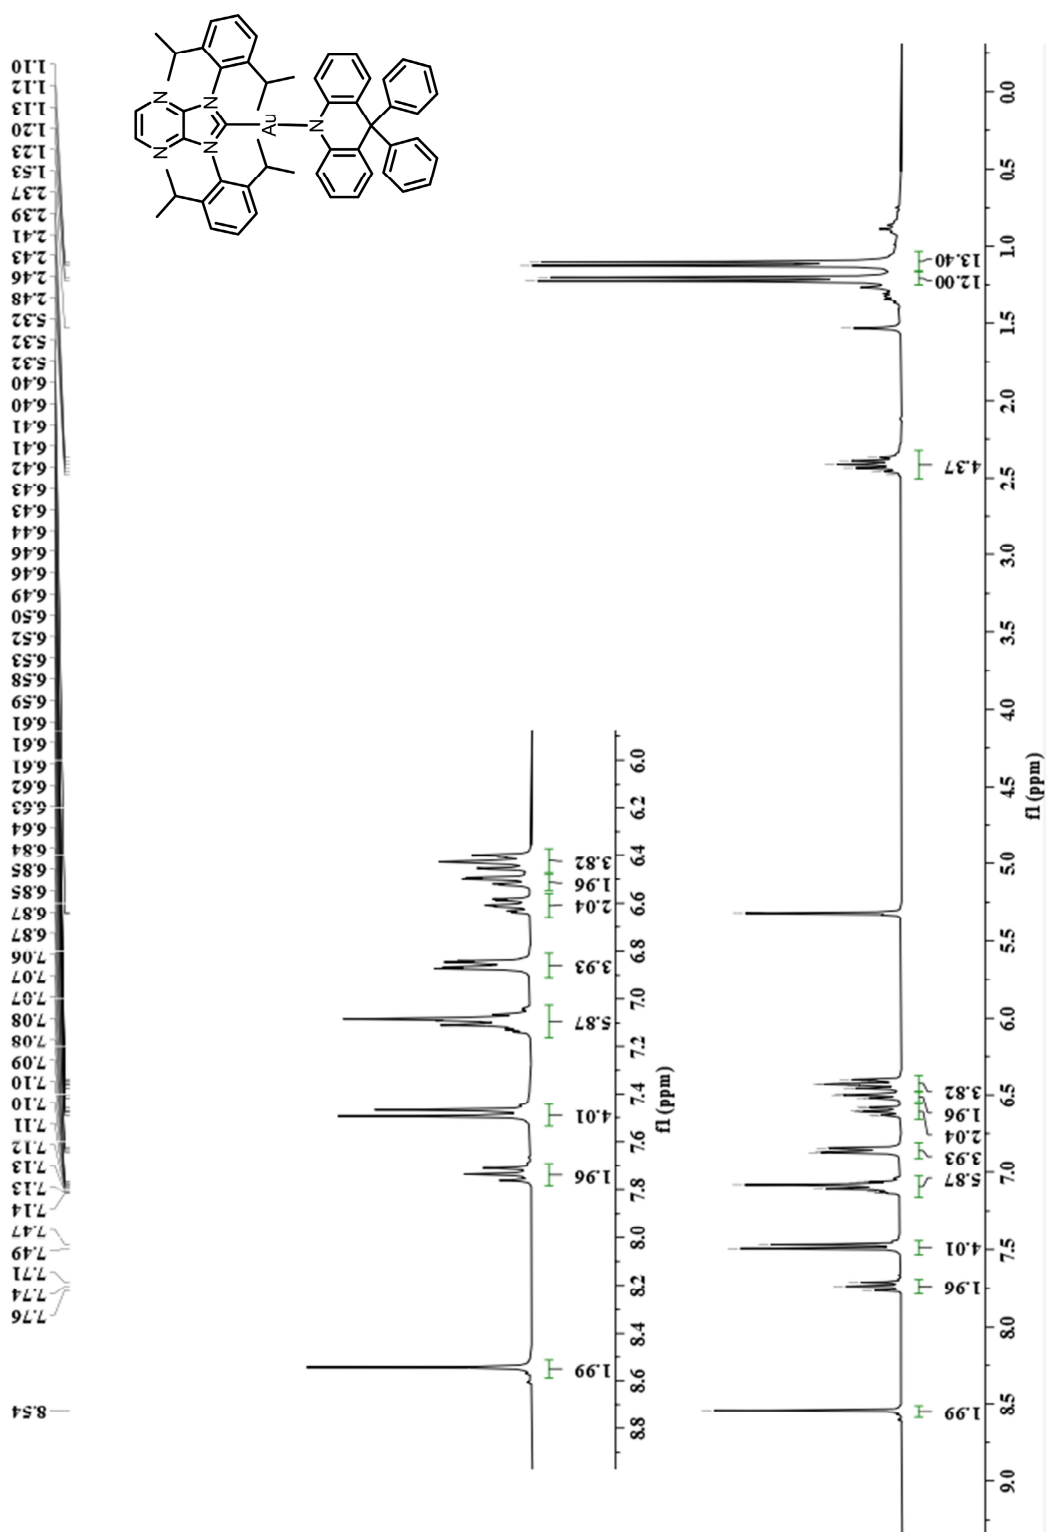

Figure S38.  $^1\text{H}$  NMR (300 MHz,  $\text{CD}_2\text{Cl}_2$ ) spectrum of  $[\text{Au}(\text{DippPZI})(\text{DPAC})]$ .

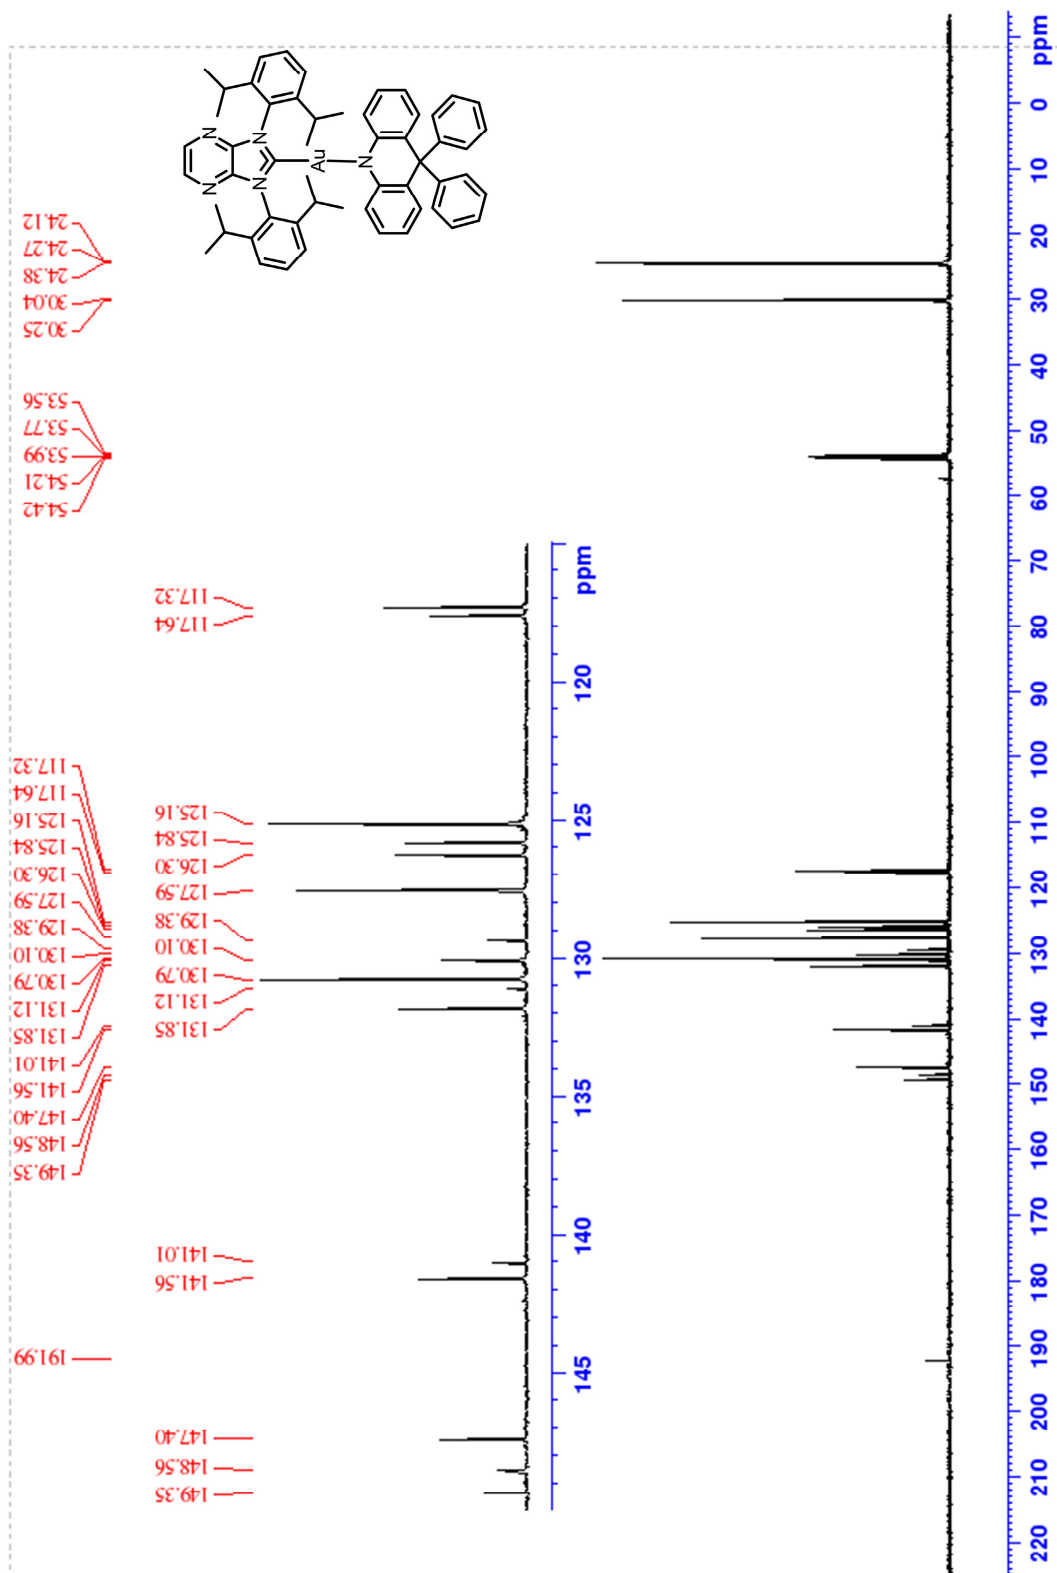

**Figure S39.**  $^{13}\text{C}\{^1\text{H}\}$  NMR (126 MHz,  $\text{CD}_2\text{Cl}_2$ ) spectrum of  $[\text{Au}(\text{DippPZI})(\text{DPAC})]$ .

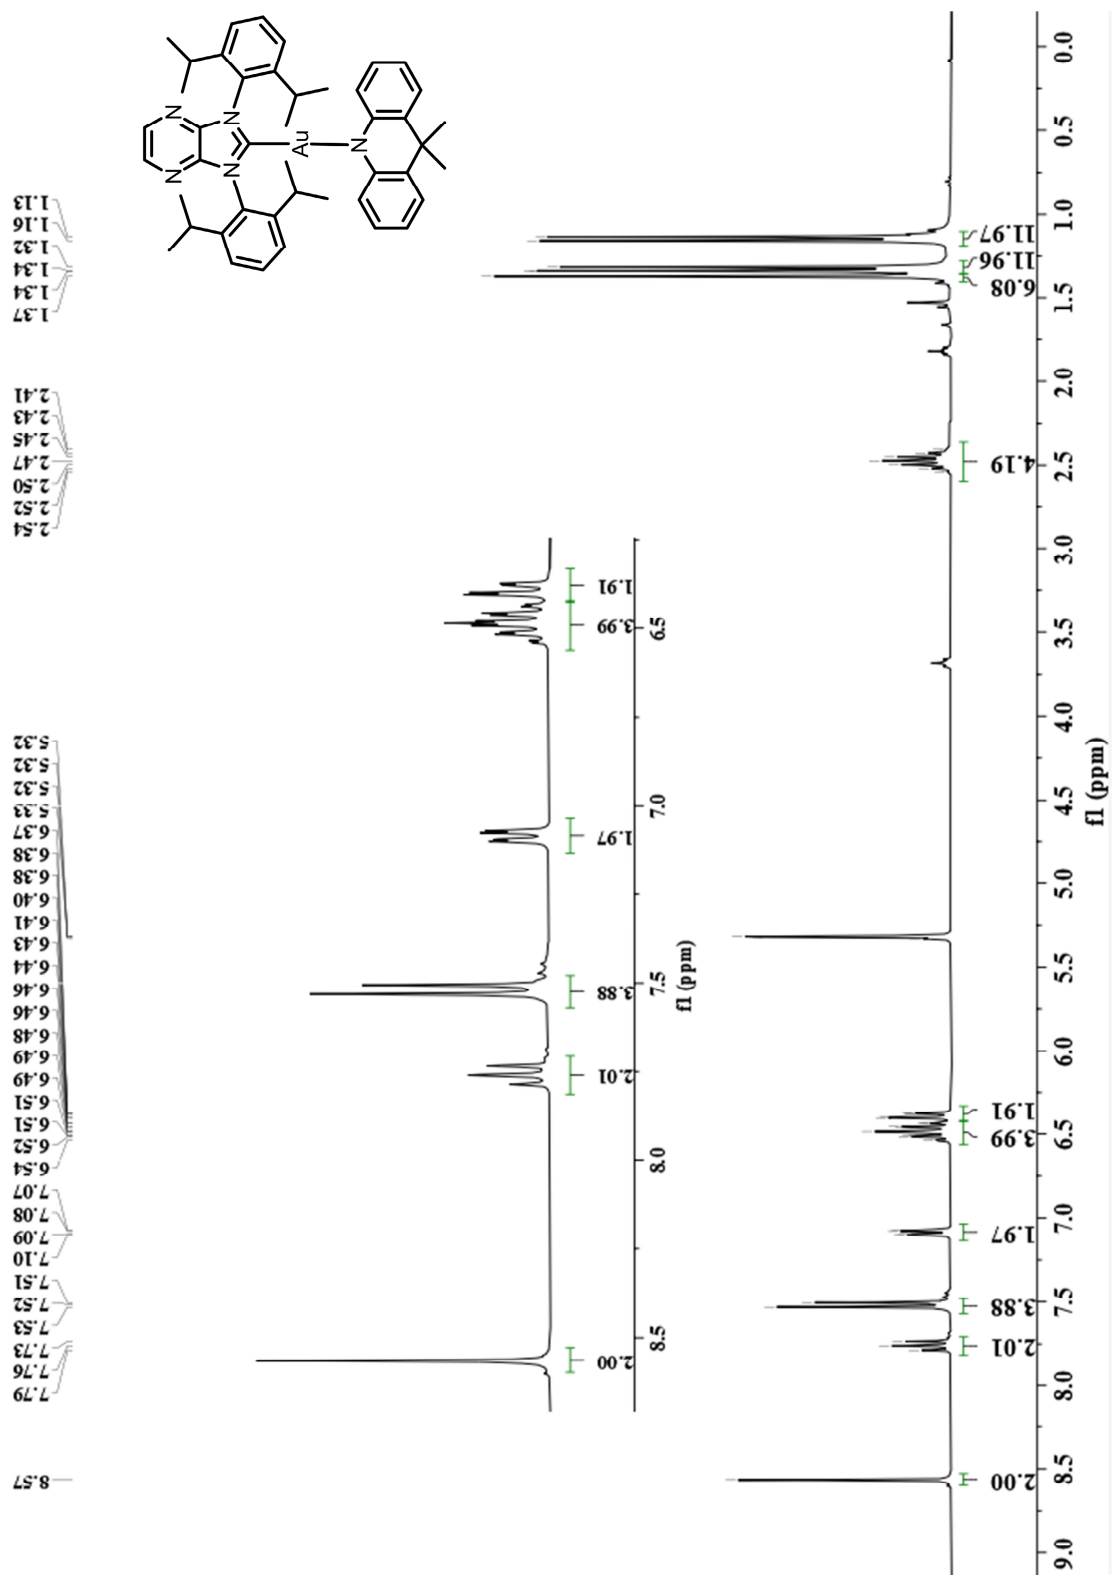

Figure S40.  $^1\text{H}$  NMR (300 MHz,  $\text{CD}_2\text{Cl}_2$ ) spectrum of  $[\text{Au}(\text{DippPZI})(\text{DMAC})]$ .

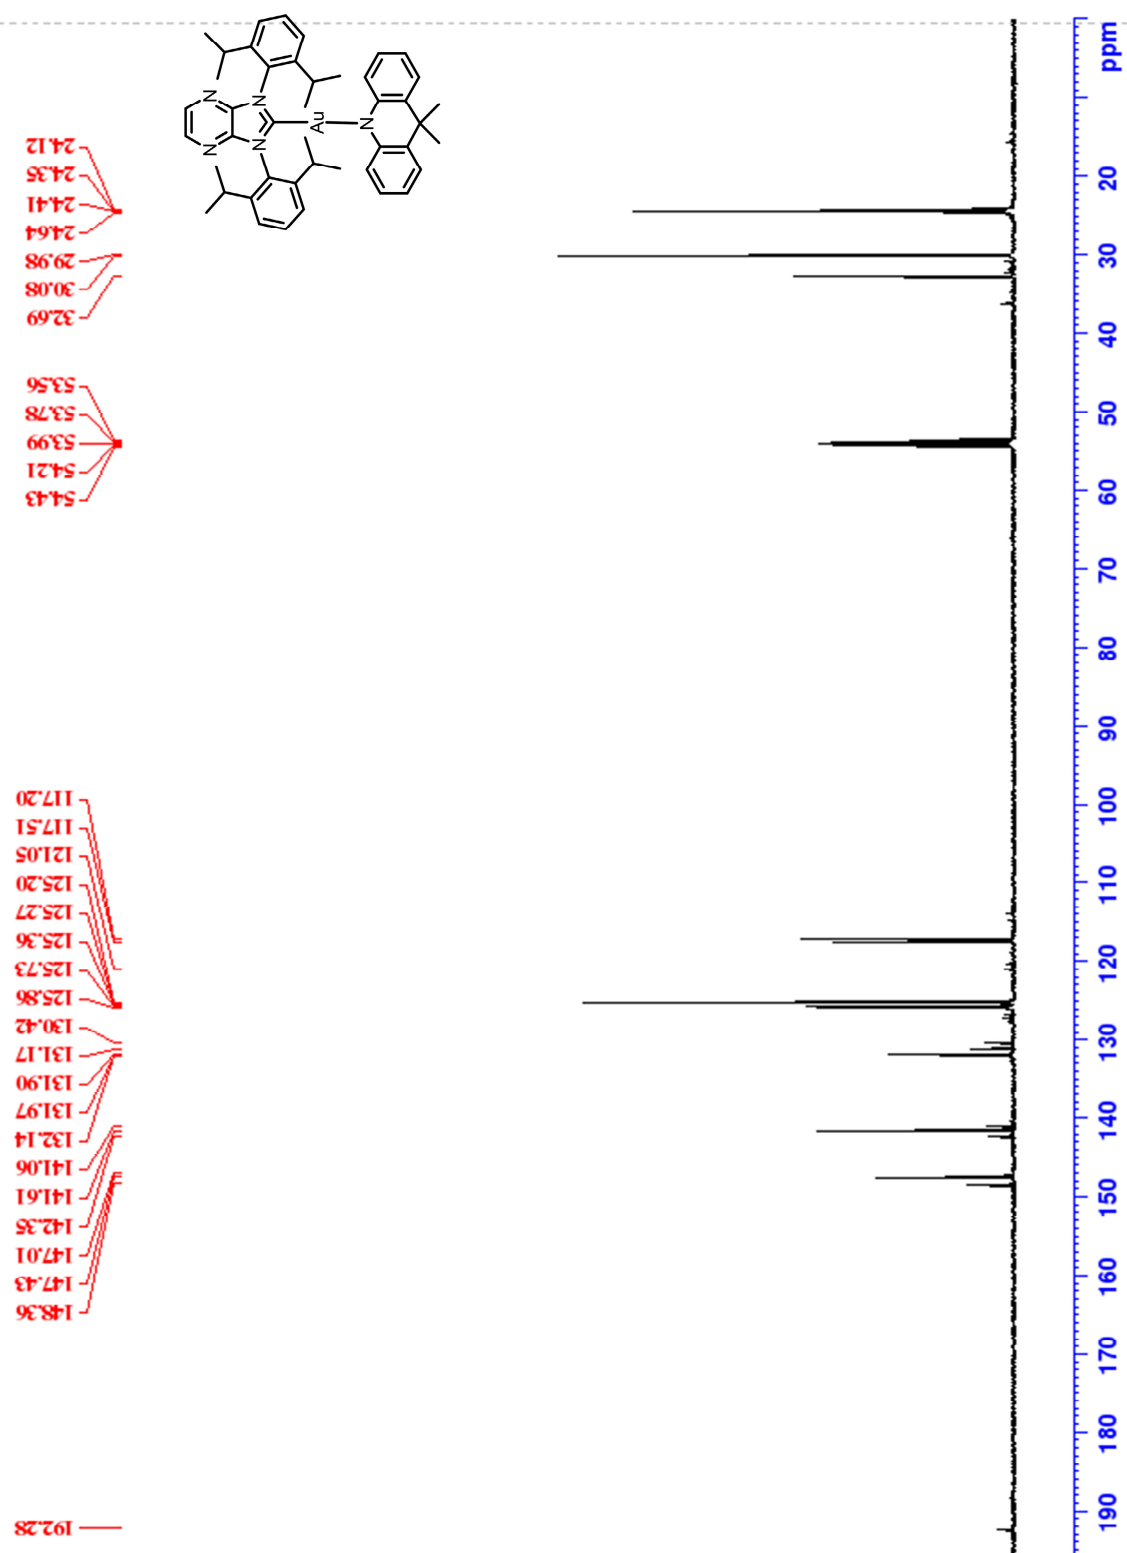

**Figure S41.**  $^{13}\text{C}\{^1\text{H}\}$  NMR (126 MHz,  $\text{CD}_2\text{Cl}_2$ ) spectrum of  $[\text{Au}(\text{DippPZI})(\text{DMAC})]$ .

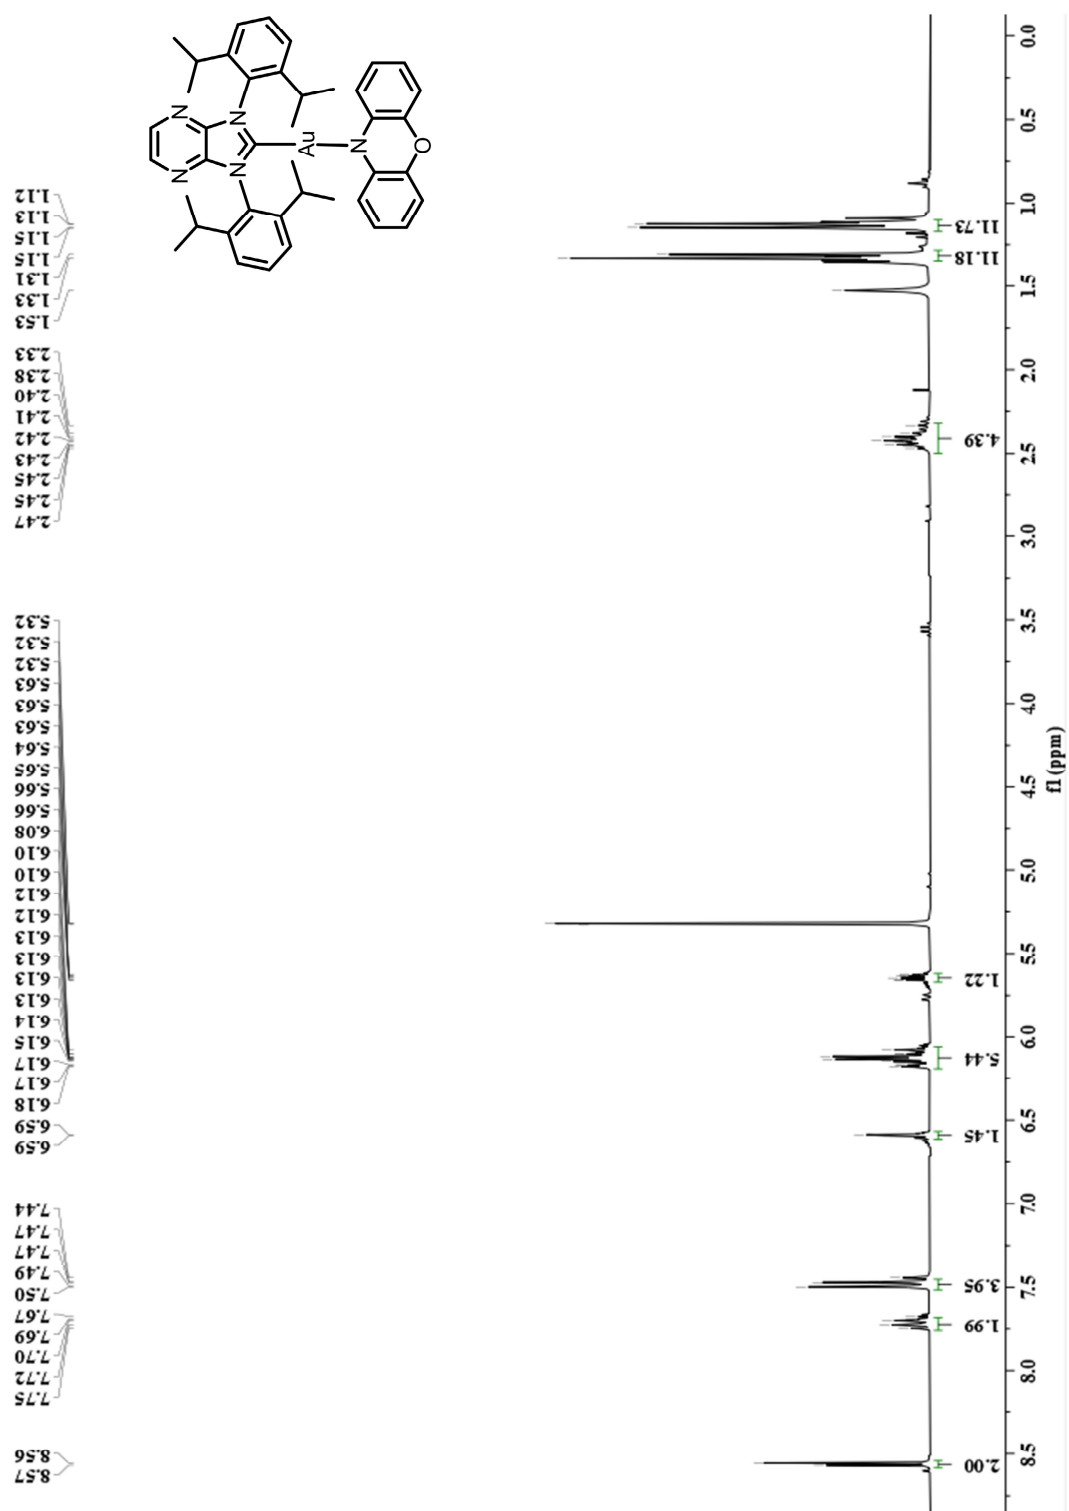

Figure S42.  $^1\text{H}$  NMR (300 MHz,  $\text{CD}_2\text{Cl}_2$ ) spectrum of  $[\text{Au}(\text{DippPZI})(\text{PXZ})]$ .

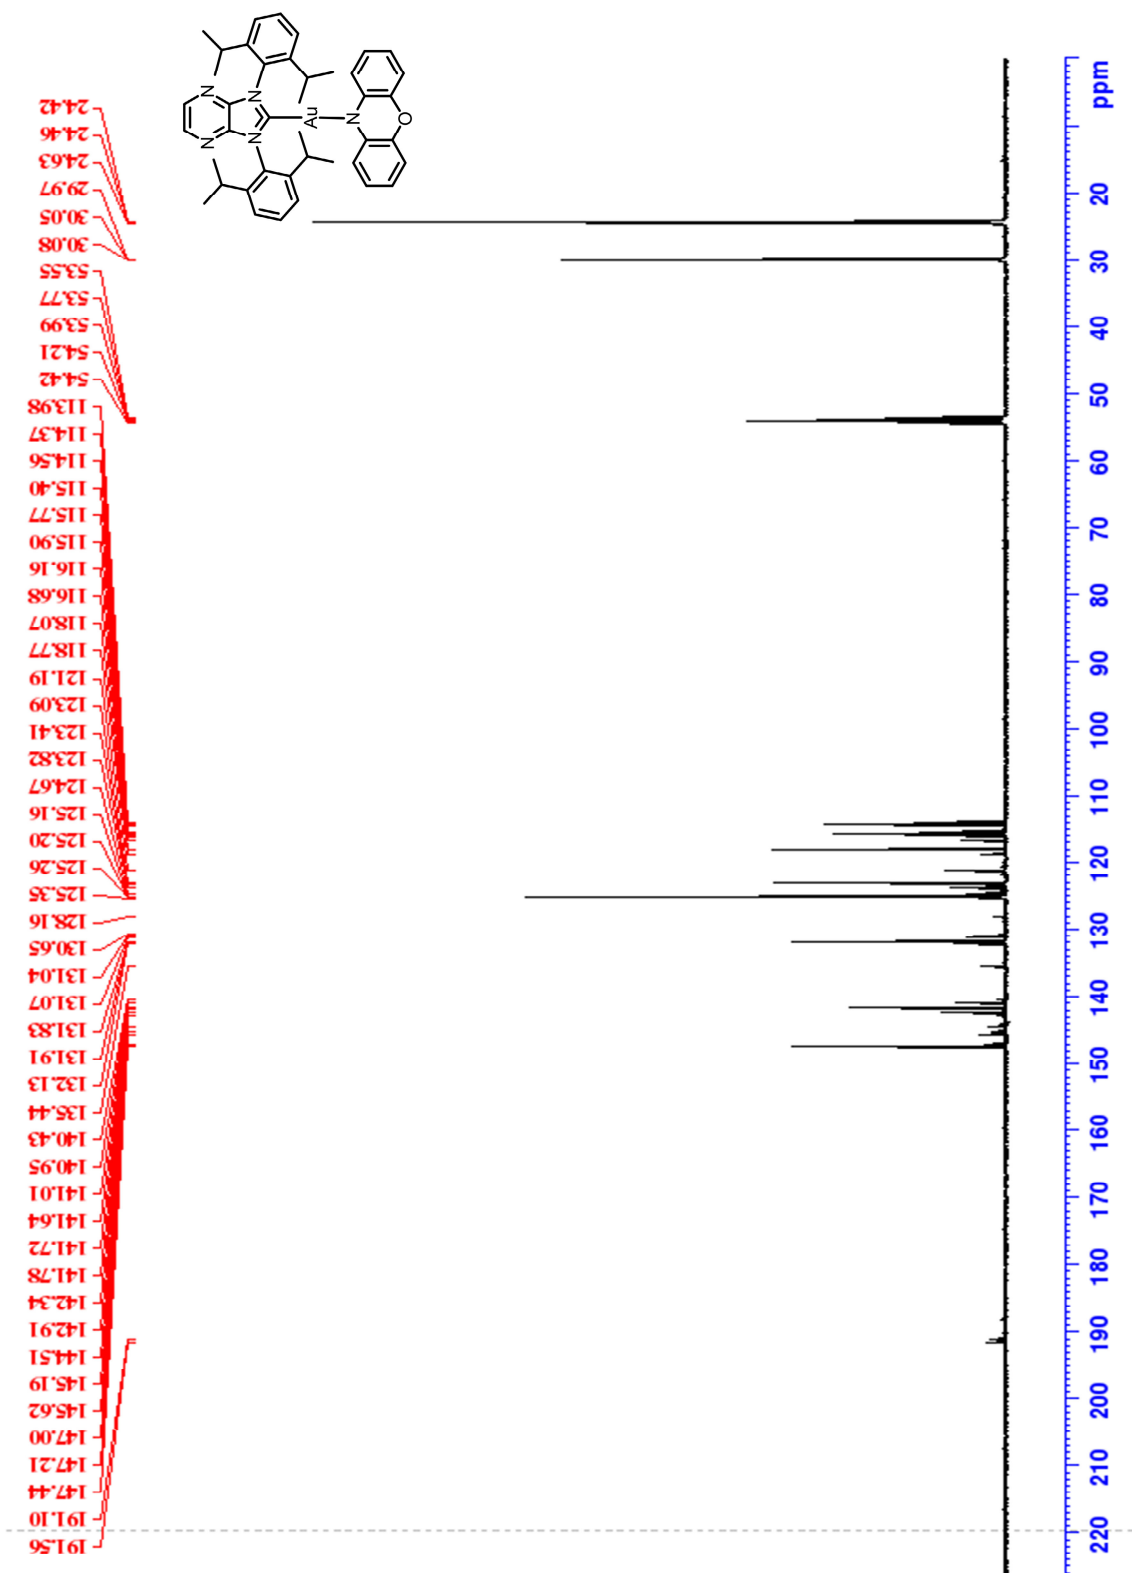

Figure S43.  $^{13}\text{C}\{^1\text{H}\}$  NMR (126 MHz,  $\text{CD}_2\text{Cl}_2$ ) spectrum of  $[\text{Au}(\text{DippPZI})(\text{PXZ})]$ .



## References

- [1] R. Hamze, M. Idris, D. S. M. Ravinson, M. C. Jung, R. Haiges, P. I. Djurovich, M. E. Thompson, *Front. Chem.* **2020**, *8*, 401.
- [2] C. N. Muniz, J. Schaab, A. Razgoniaev, P. I. Djurovich, M. E. Thompson, *J. Am. Chem. Soc.* **2022**, *144*, 17916.
- [3] G. M. Sheldrick, *Acta Cryst. A* **2008**, *64*, 112.
- [4] G. Heinrich, S. Schoof, H. Gusten, *J. Photochem.* **1974**, *3*, 315.
- [5] T. Hofbeck, U. Monkowius, H. Yersin, *J. Am. Chem. Soc.* **2015**, *137*, 399.
- [6] A. Ying, Y.-H. Huang, C.-H. Lu, Z. Chen, W.-K. Lee, X. Zeng, T. Chen, X. Cao, C.-C. Wu, S. Gong, C. Yang, *ACS Appl. Mater. Interfaces* **2021**, *13*, 13478.
- [7] T. Lu, F. Chen, *J. Comput. Chem.* **2011**, *33*, 580.
- [8] Z. Liu, T. Lu, Q. Chen, *Carbon* **2020**, *165*, 461.
- [9] Y. Li, L. Yang, H. He, L. Sun, H. Wang, X. Fang, Y. Zhao, D. Zheng, Y. Qi, Z. Li, W. Deng, *Nat. Commun.* **2022**, *13*, 1355.
- [10] S. Jin, X. Sui, G. C. Haug, V. D. Nguyen, H. T. Dang, H. D. Arman, O. V. Larionov, *ACS Catal.* **2022**, *12*, 285.
- [11] W. Song, J. Y. Lee, *Org. Electron.* **2017**, *51*, 1.
- [12] R. Hamze, S. Shi, S. C. Kapper, D. S. M. Ravinson, L. Estergreen, M.-C. Jung, A. C. Tadel, R. Haiges, P. I. Djurovich, J. L. Peltier, R. Jazzar, G. Bertrand, S. E. Bradforth, and M. E. Thompson, *J. Am. Chem. Soc.* **2019**, *141*, 8616.
- [13] X. Feng, J.-G. Yang, J. Miao, C. Zhong, X. Yin, N. Li, C. Wu, Q. Zhang, Y. Chen, K. Li, C. Yang, *Angew. Chem., Int. Ed.* **2022**, *61*, e202209451.
